# Supplementary material
Source: PubMed Central journal article supplement (PMC9904088)
Supplement: mmc1.pdf [file mmc1.pdf]

**Supplementary material to “Patterns and descriptors of COVID-19 testing and lab-confirmed COVID-19 incidence in Manitoba, Canada, March 2020-May 2021: A population-based study” by Christiaan H. Righolt, Geng Zhang, Emrah Sever, Krista Wilkinson, Salaheddin M. Mahmud**

**Supplementary figures**

**Supplementary figure 1: Daily effective reproduction number  $R_t$ .**

Daily effective reproduction number

5  
4  
3  
2  
1

—  $R_t$   
- - - CI of  $R_t$

Mar 08 Mar 15 Mar 22 Mar 29 Apr 05 Apr 12 Apr 19 Apr 26 May 03 May 10 May 17 May 24 May 31 Jun 07 Jun 14 Jun 21 Jun 28 Jul 05 Jul 12 Jul 19 Jul 26 Aug 02 Aug 09 Aug 16 Aug 23 Aug 30 Sep 06 Sep 13 Sep 20 Sep 27 Oct 04 Oct 11 Oct 18 Oct 25 Nov 01 Nov 08 Nov 15 Nov 22 Nov 29 Dec 06 Dec 13 Dec 20 Dec 27 Jan 03 Jan 10 Jan 17 Jan 24 Jan 31 Feb 07 Feb 14 Feb 21 Feb 28 Mar 07 Mar 14 Mar 21 Mar 28 Apr 04 Apr 11 Apr 18 Apr 25 May 02 May 09 May 16 May 23

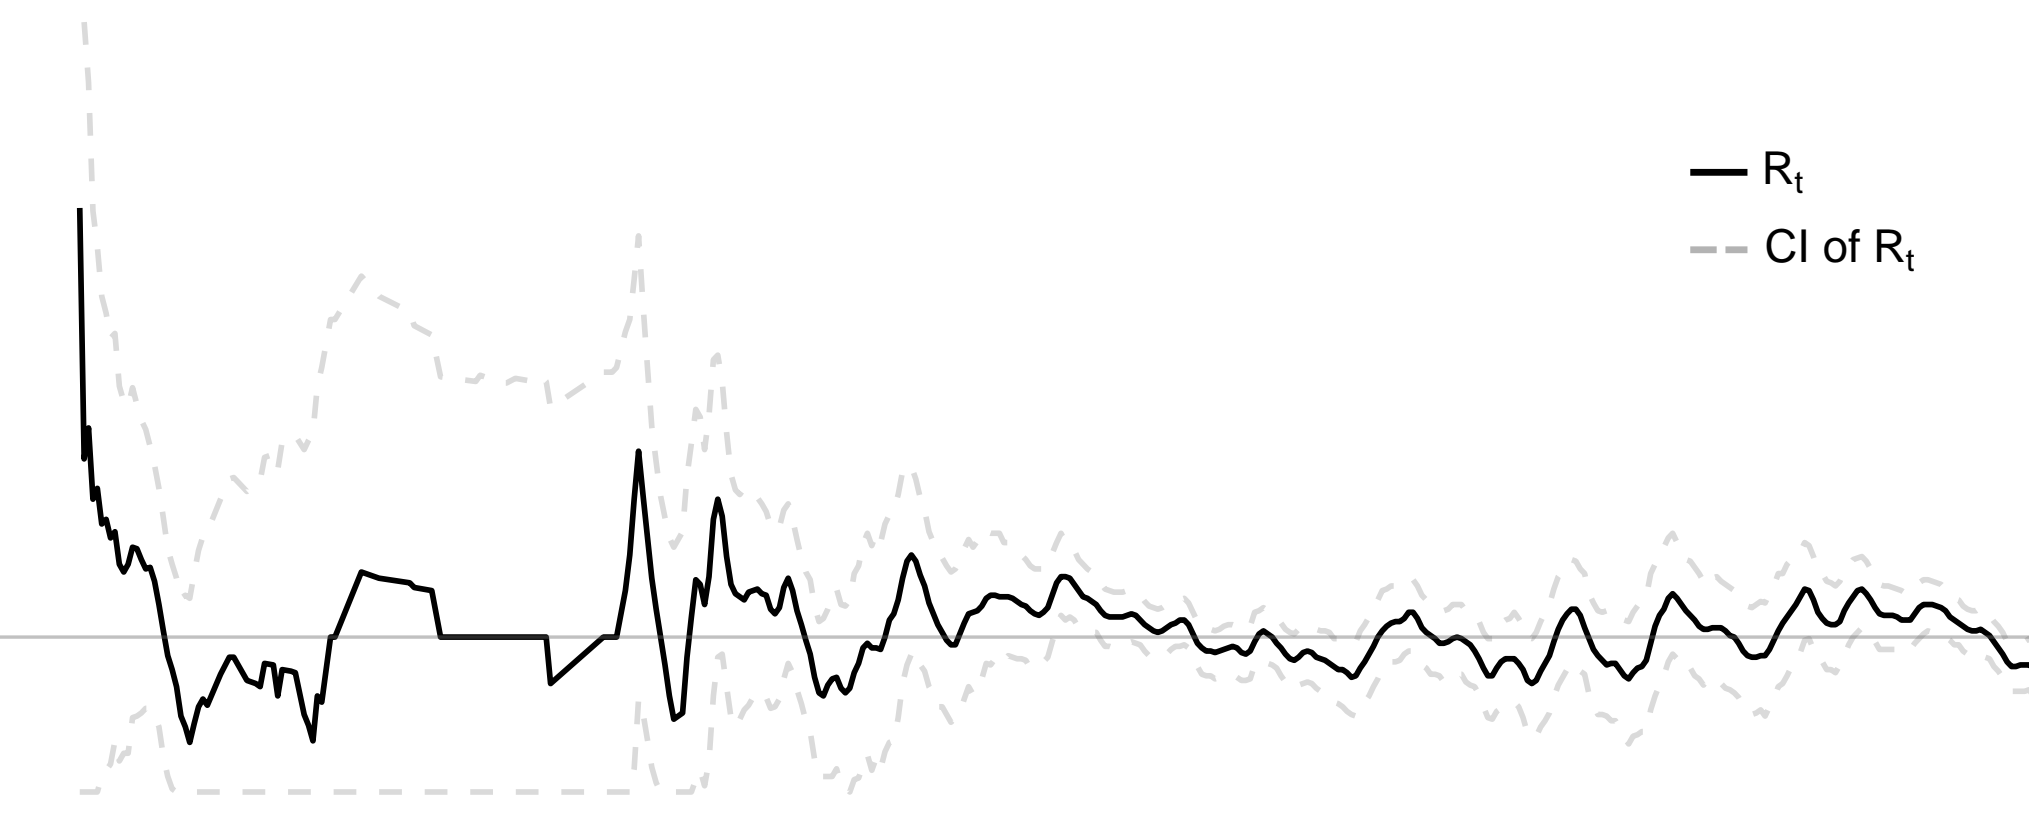

**Supplementary figure 2: Weekly COVID-19 laboratory testing rate according to age, gender, region of residence, and neighborhood income quintile**

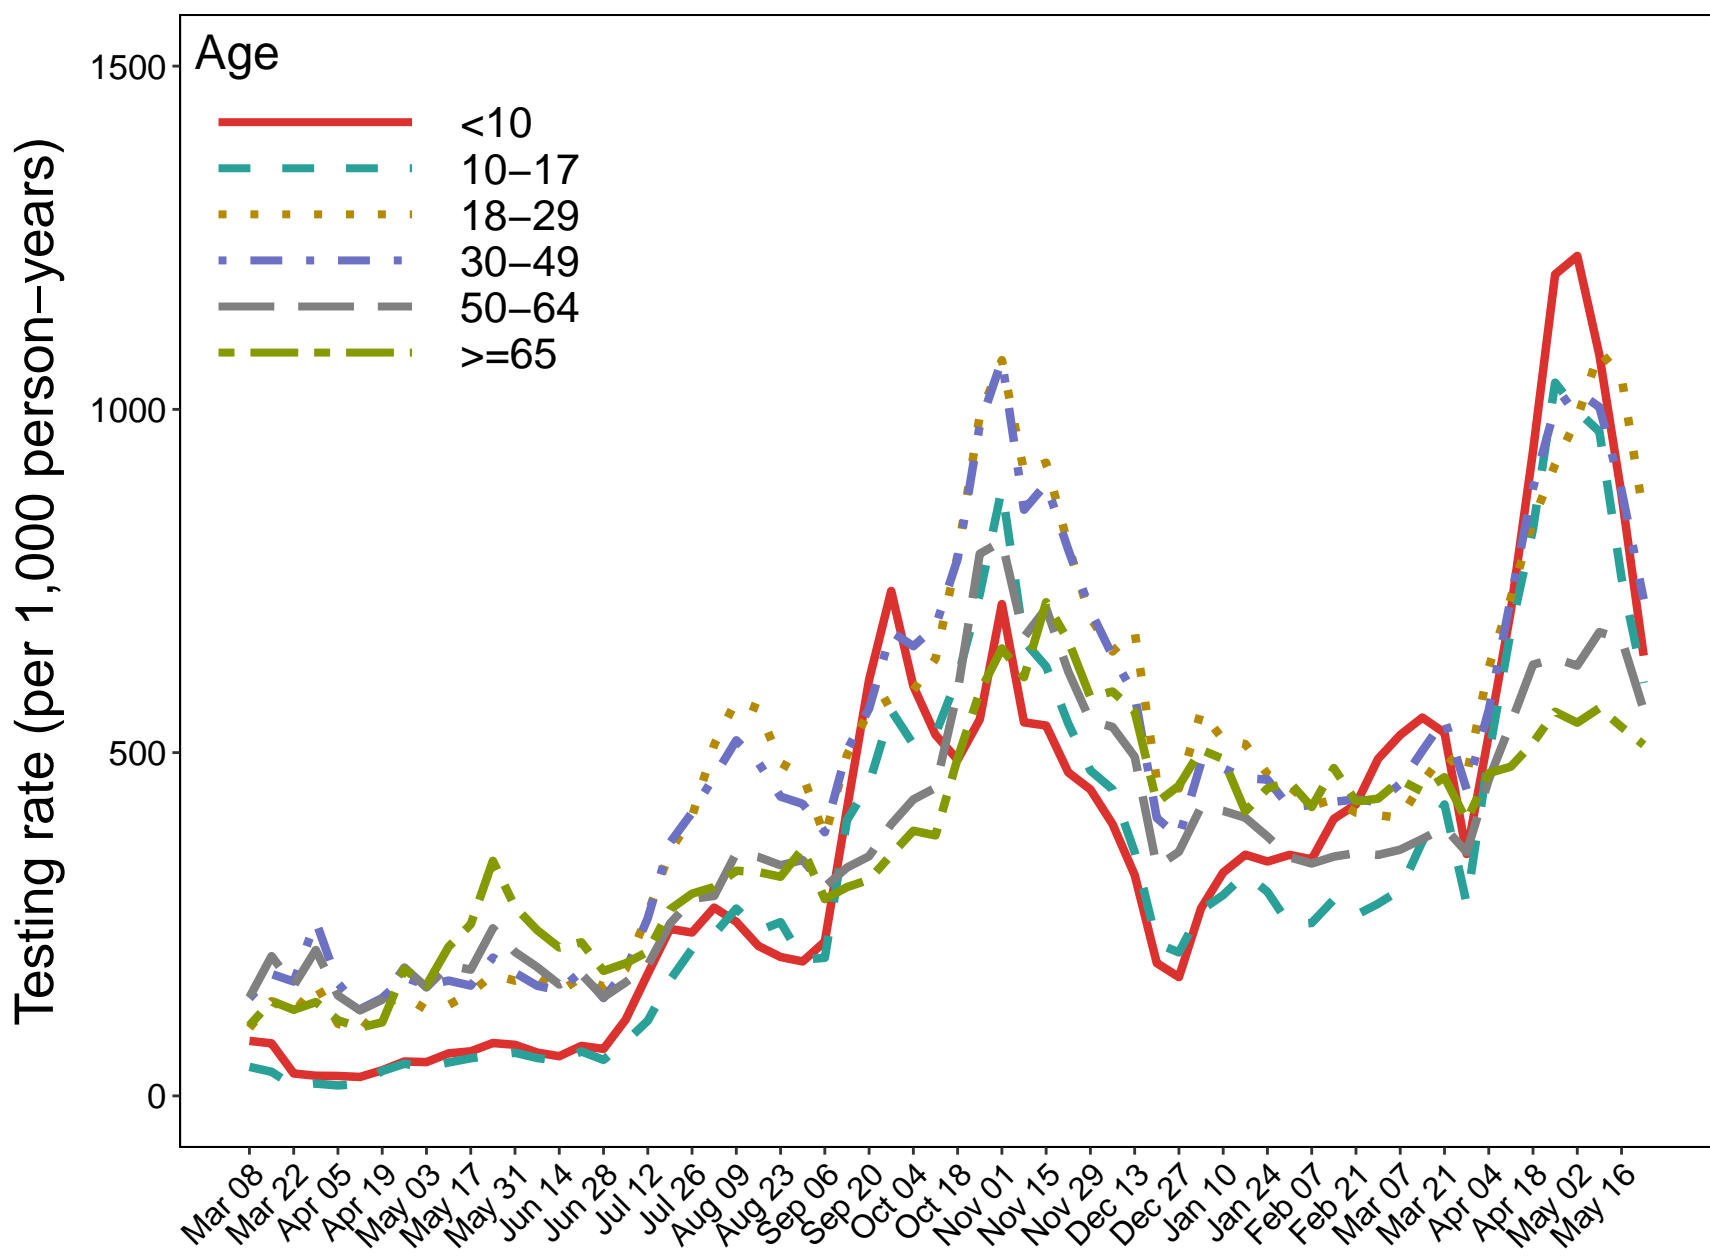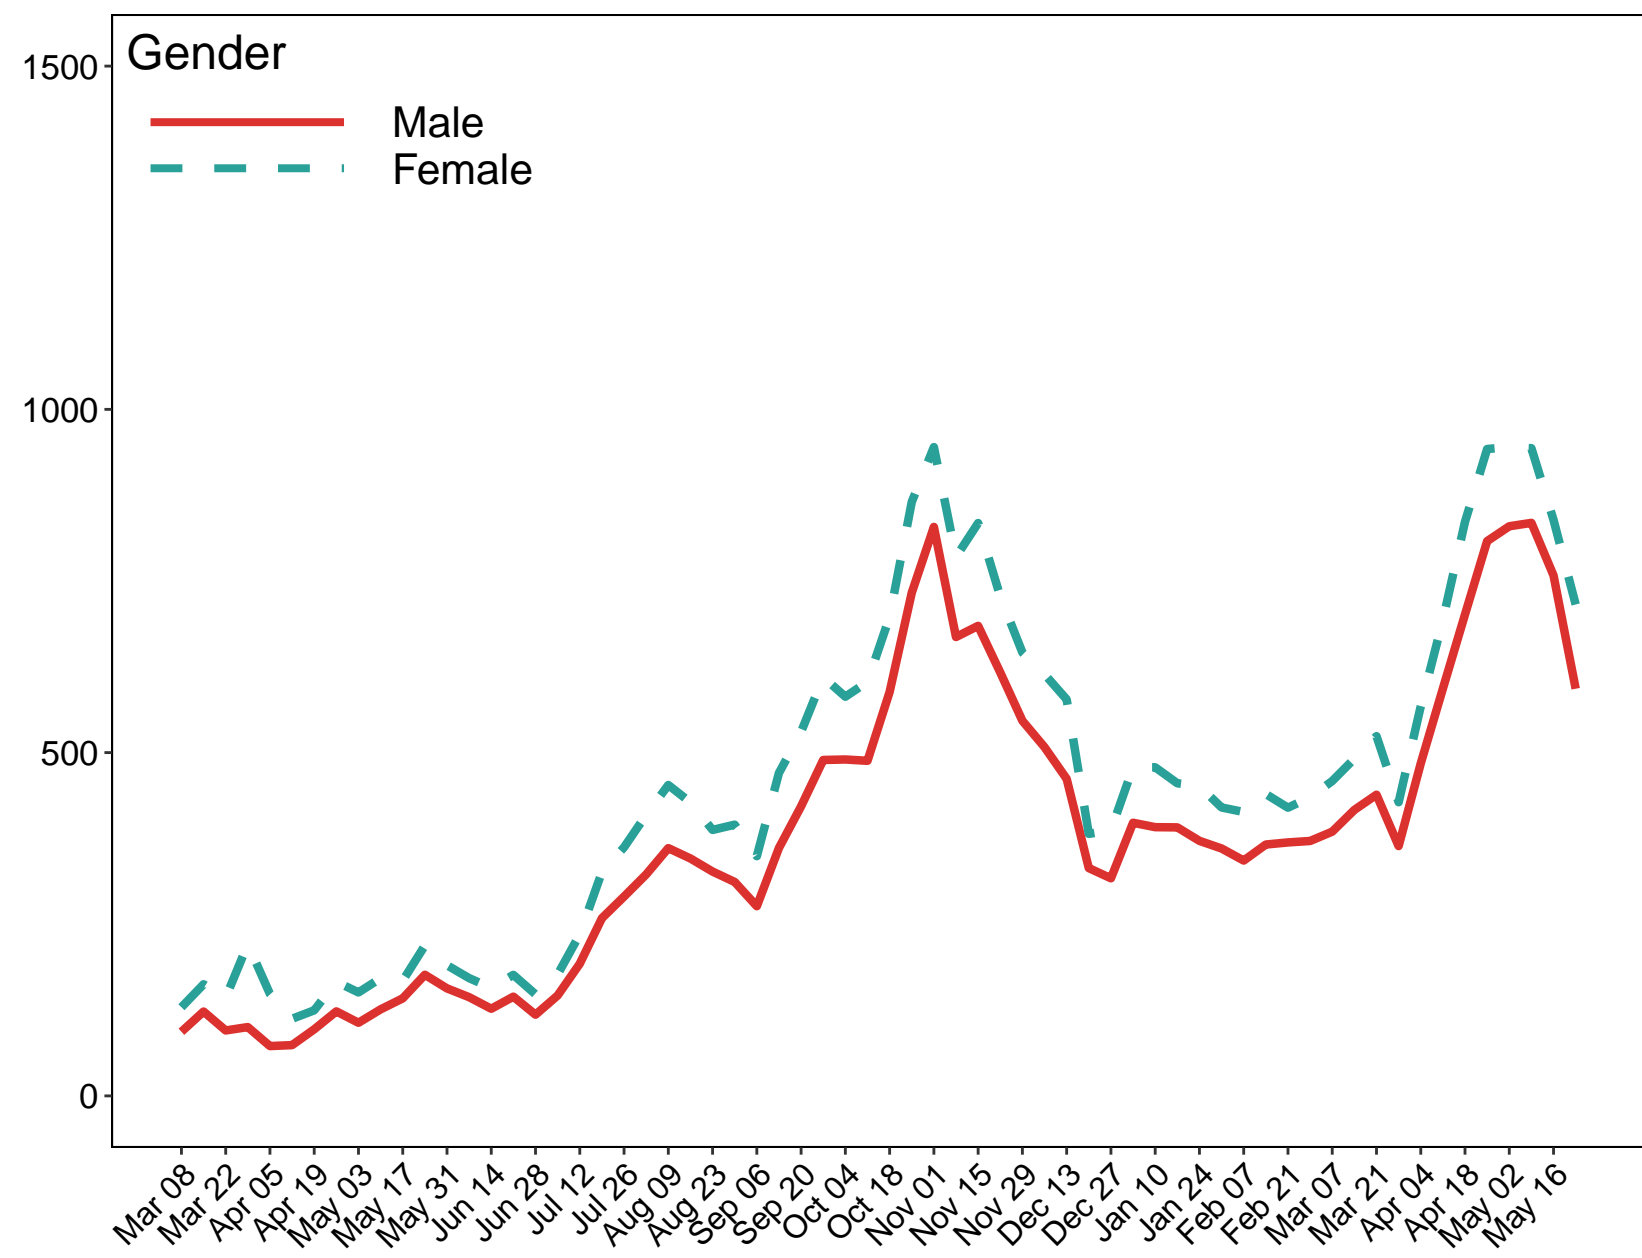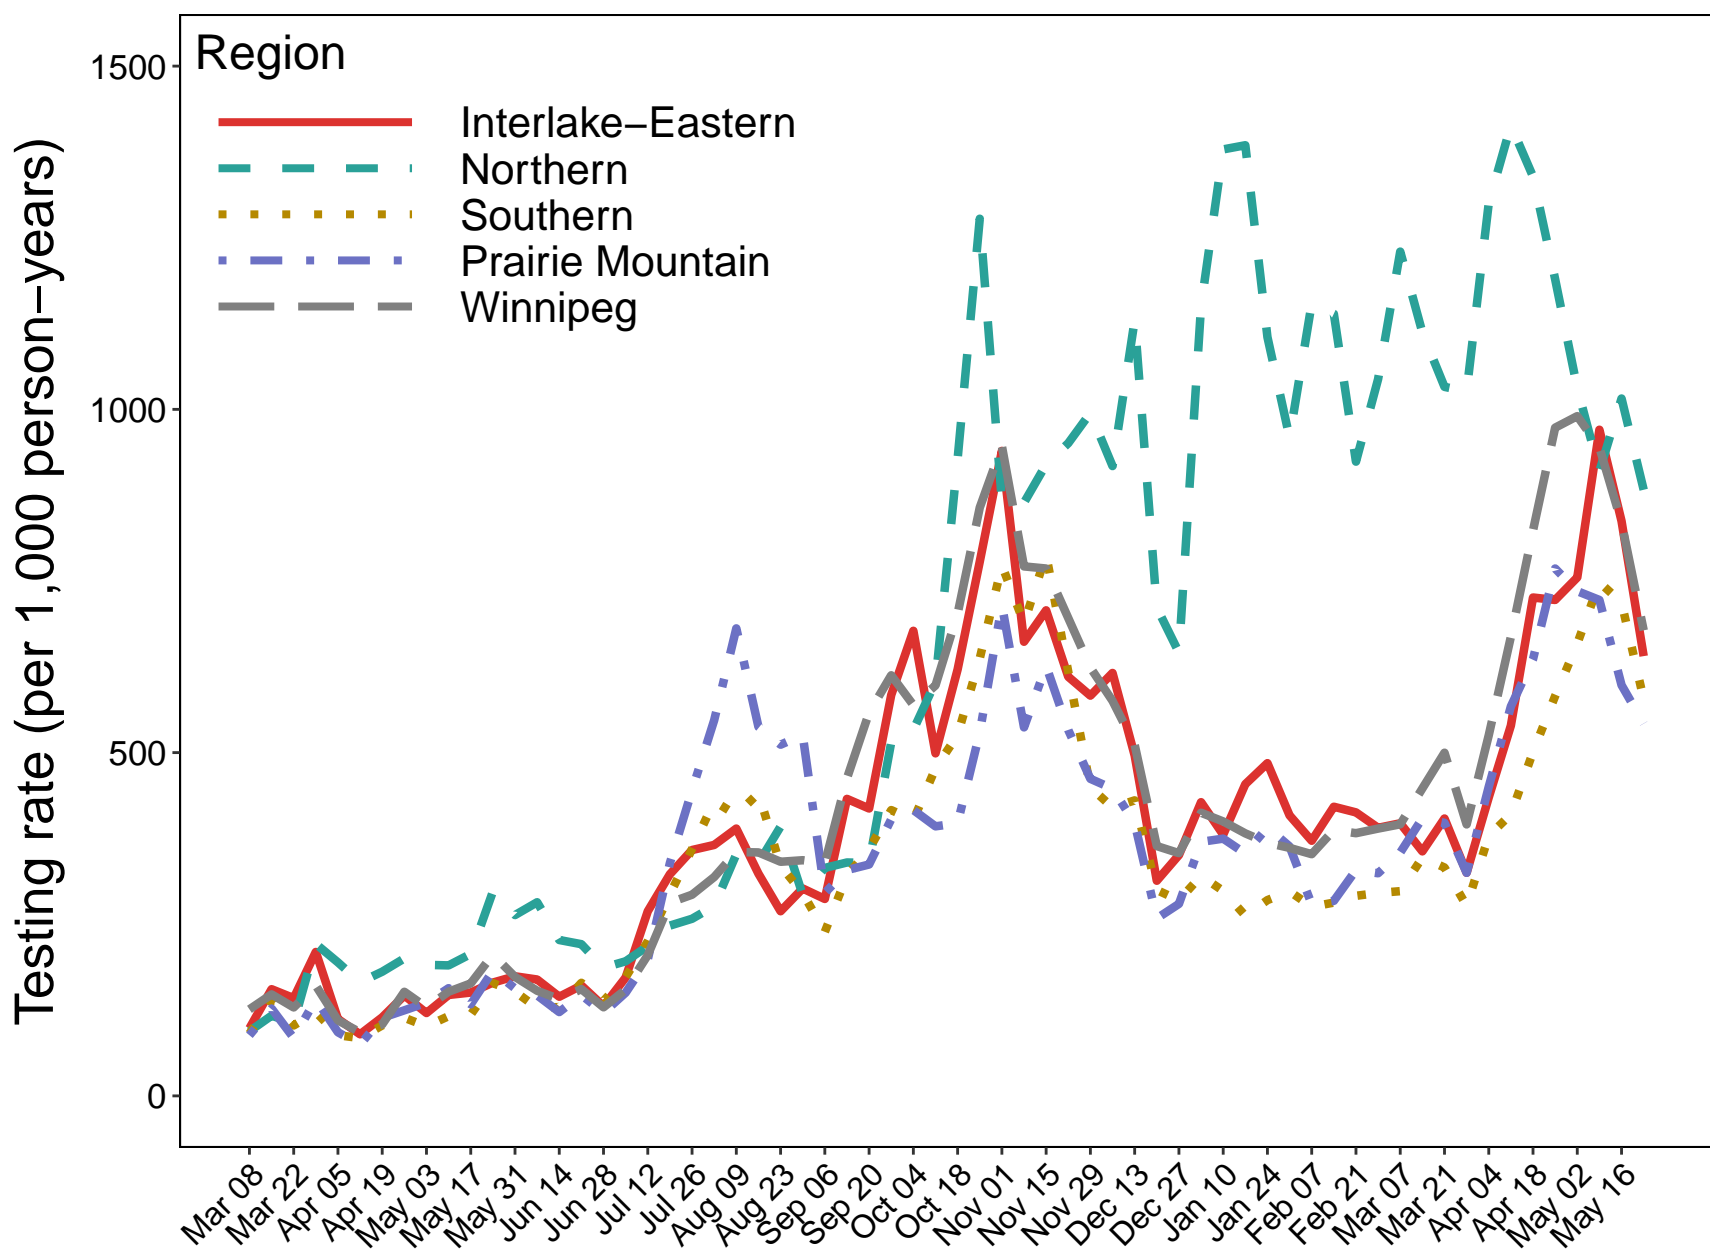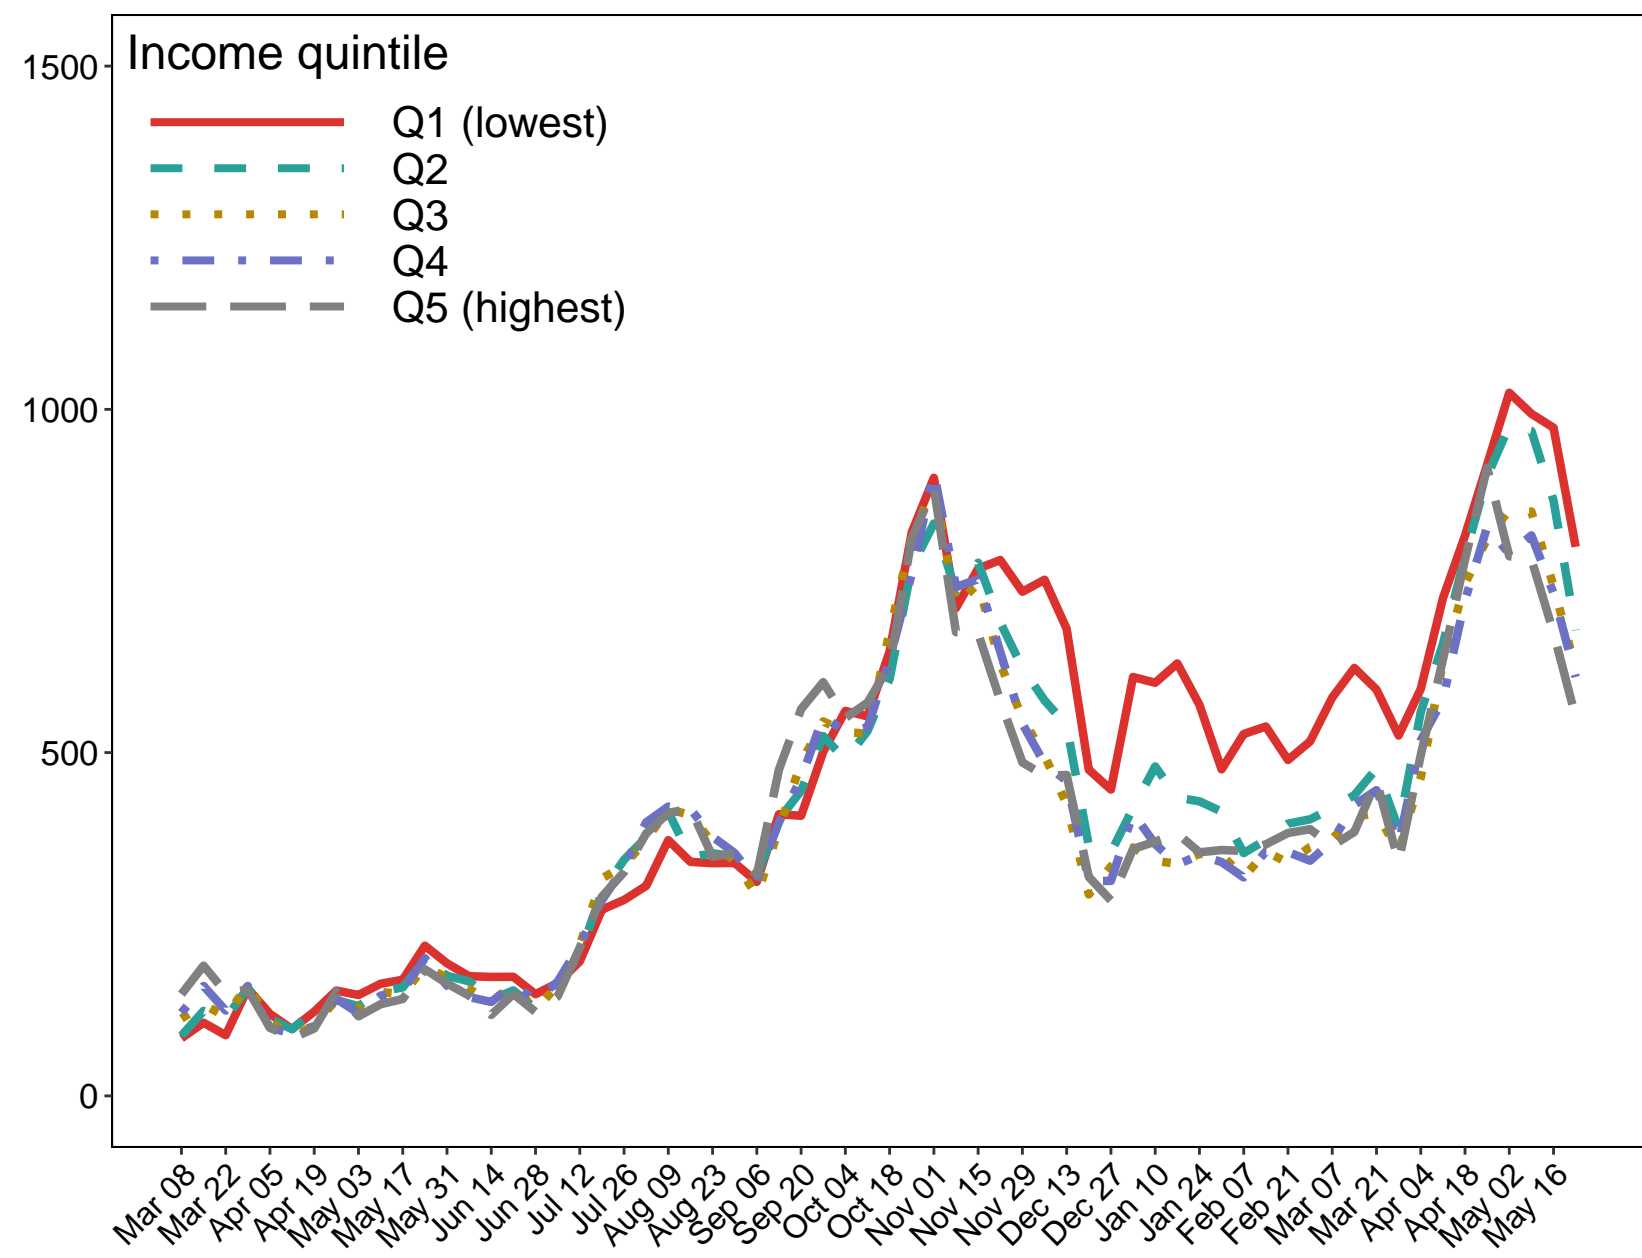

**Supplementary figure 3: Weekly laboratory-confirmed COVID-19 incidence rate according to age, gender, region of residence, and neighborhood income quintile**

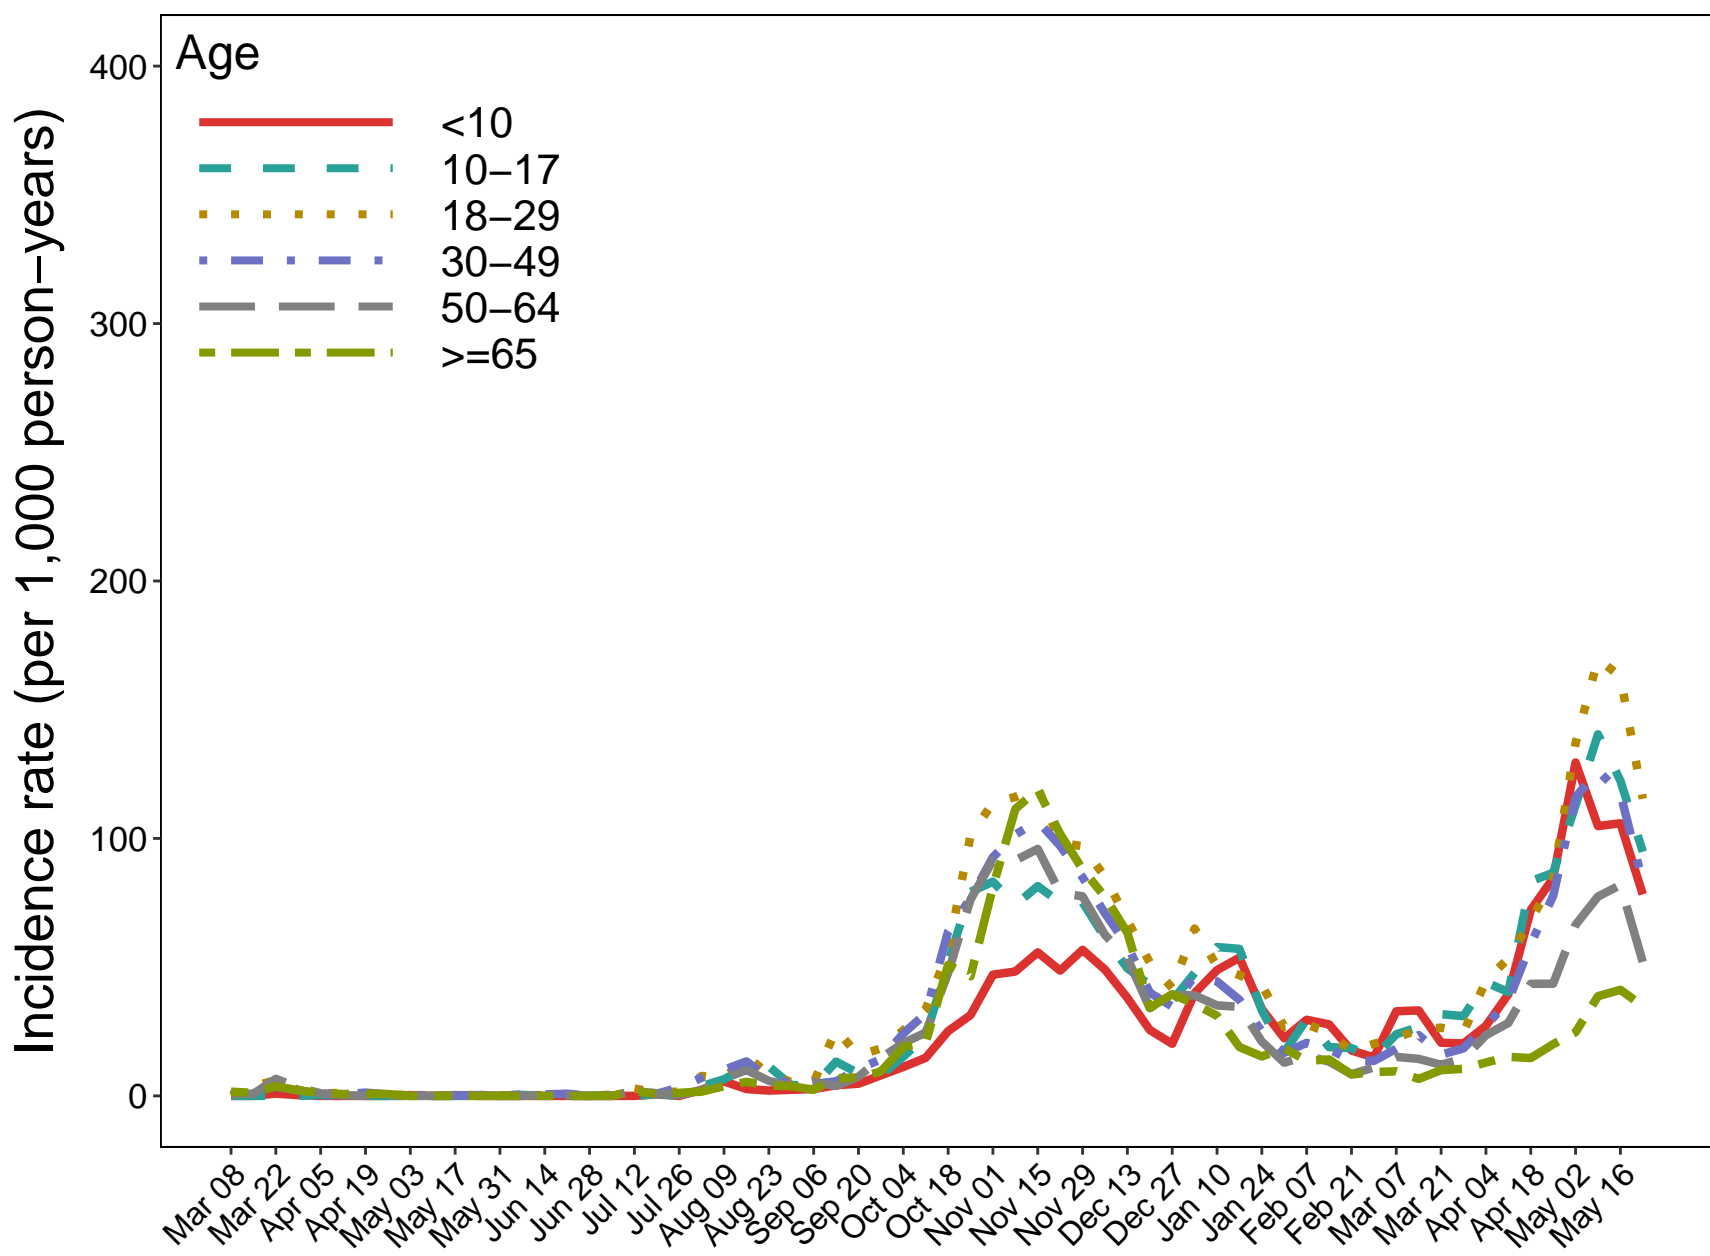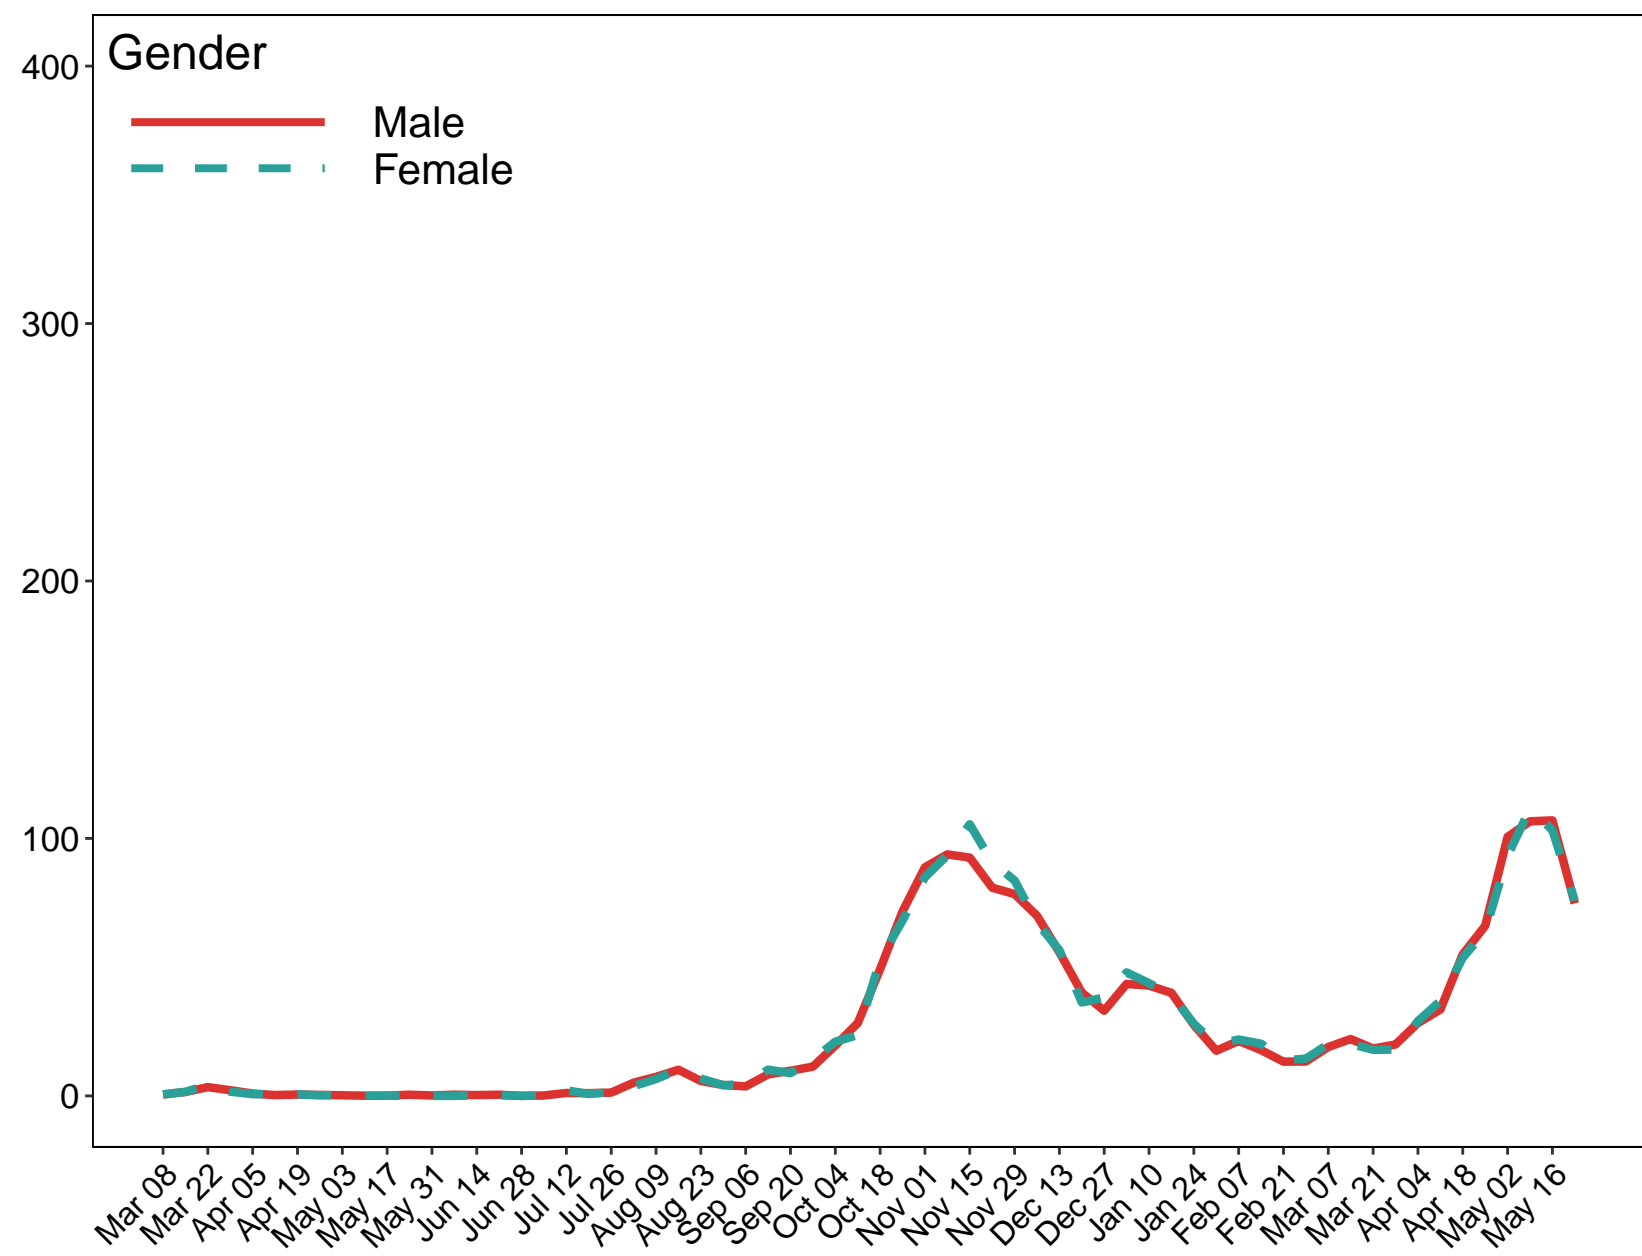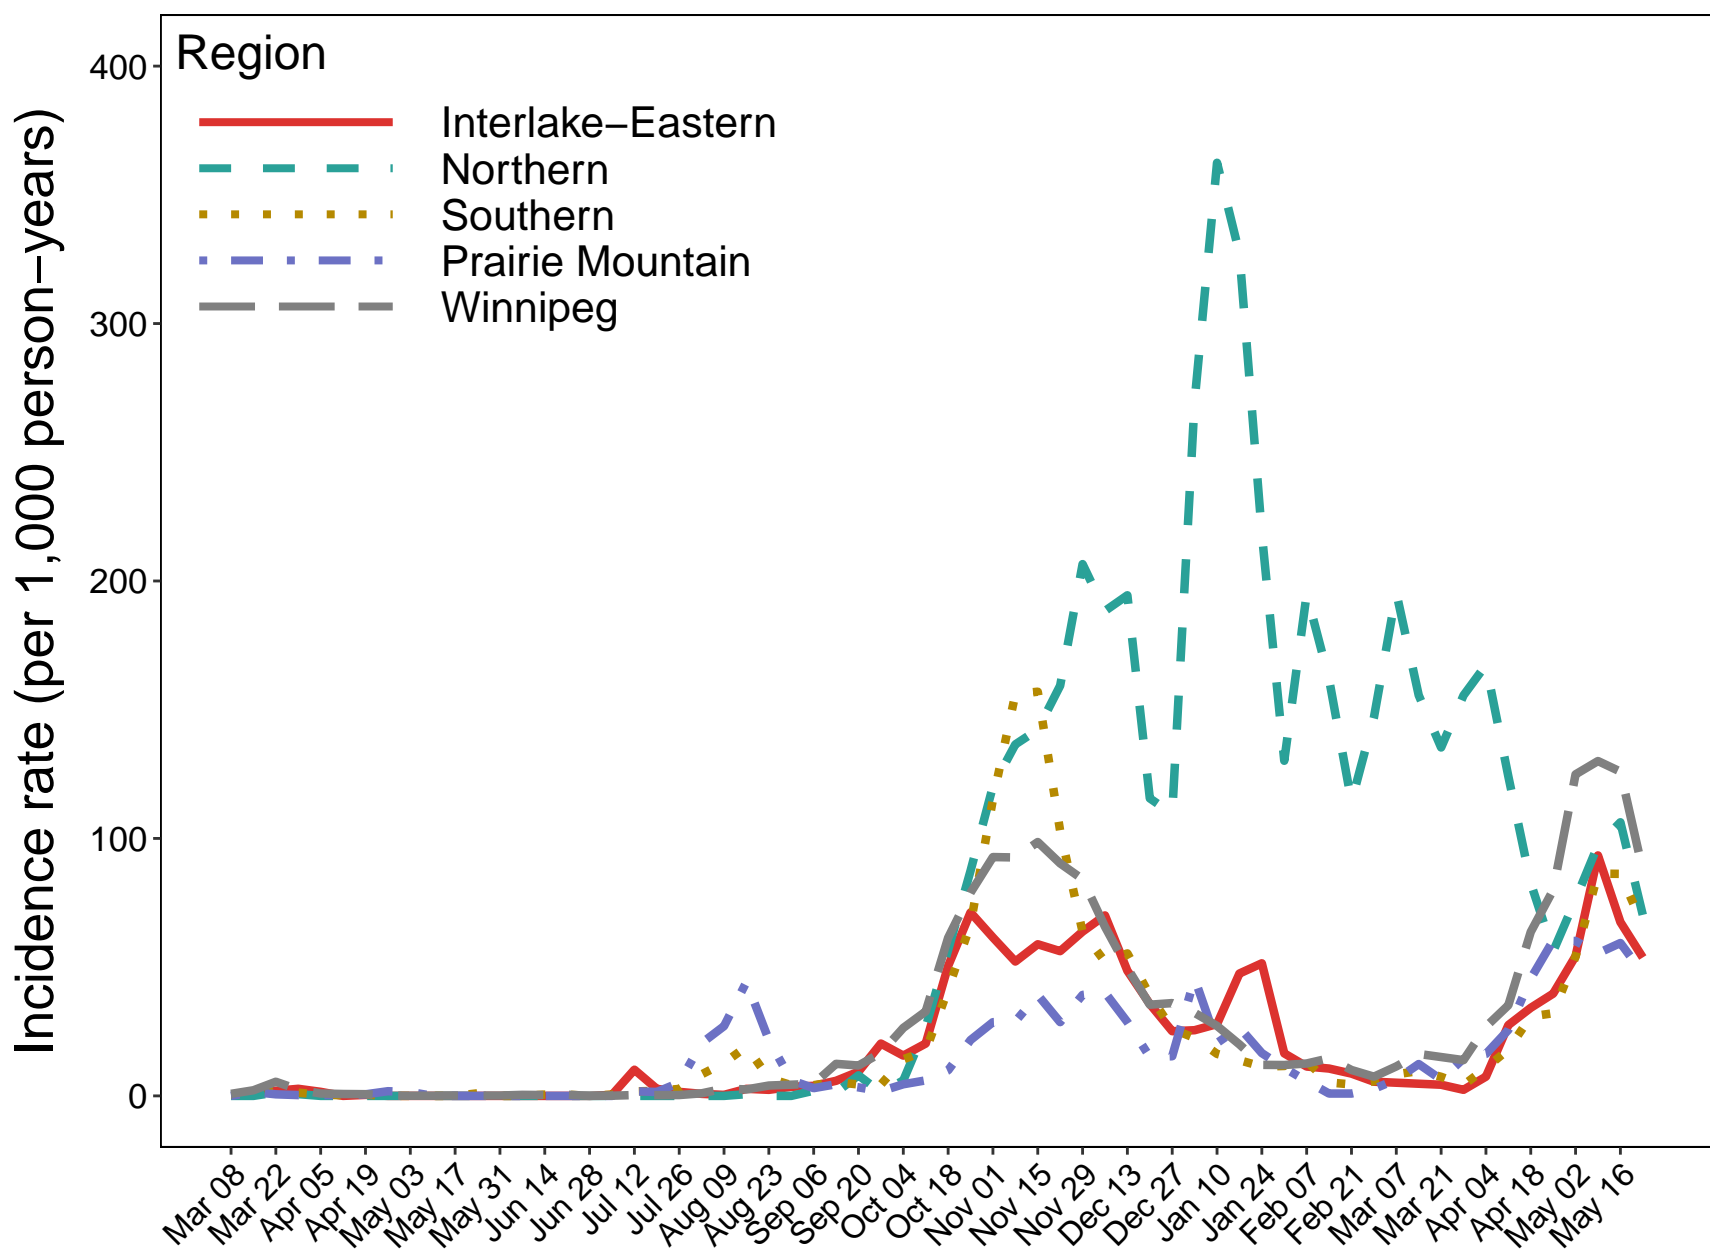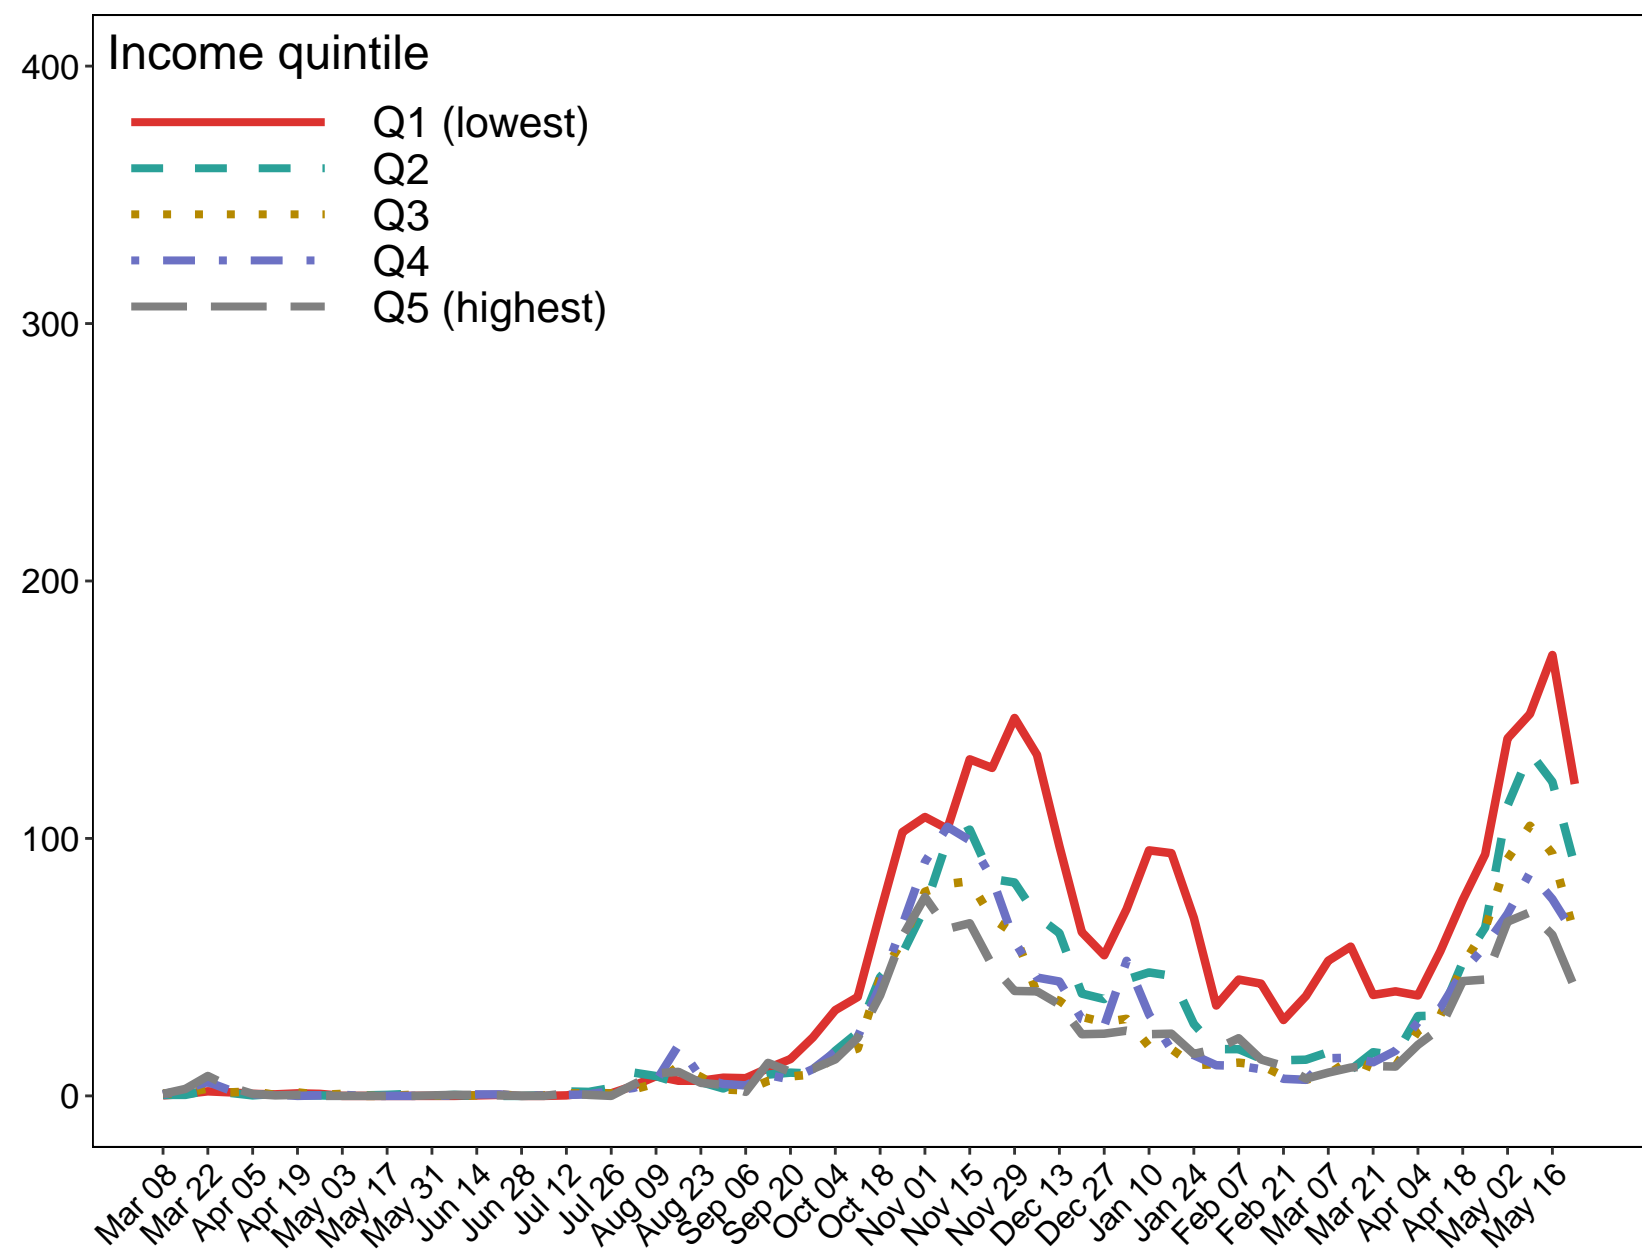

**Supplementary figure 4: Weekly COVID-19 laboratory test positivity rate according to age, gender, region of residence, and neighborhood income quintile**

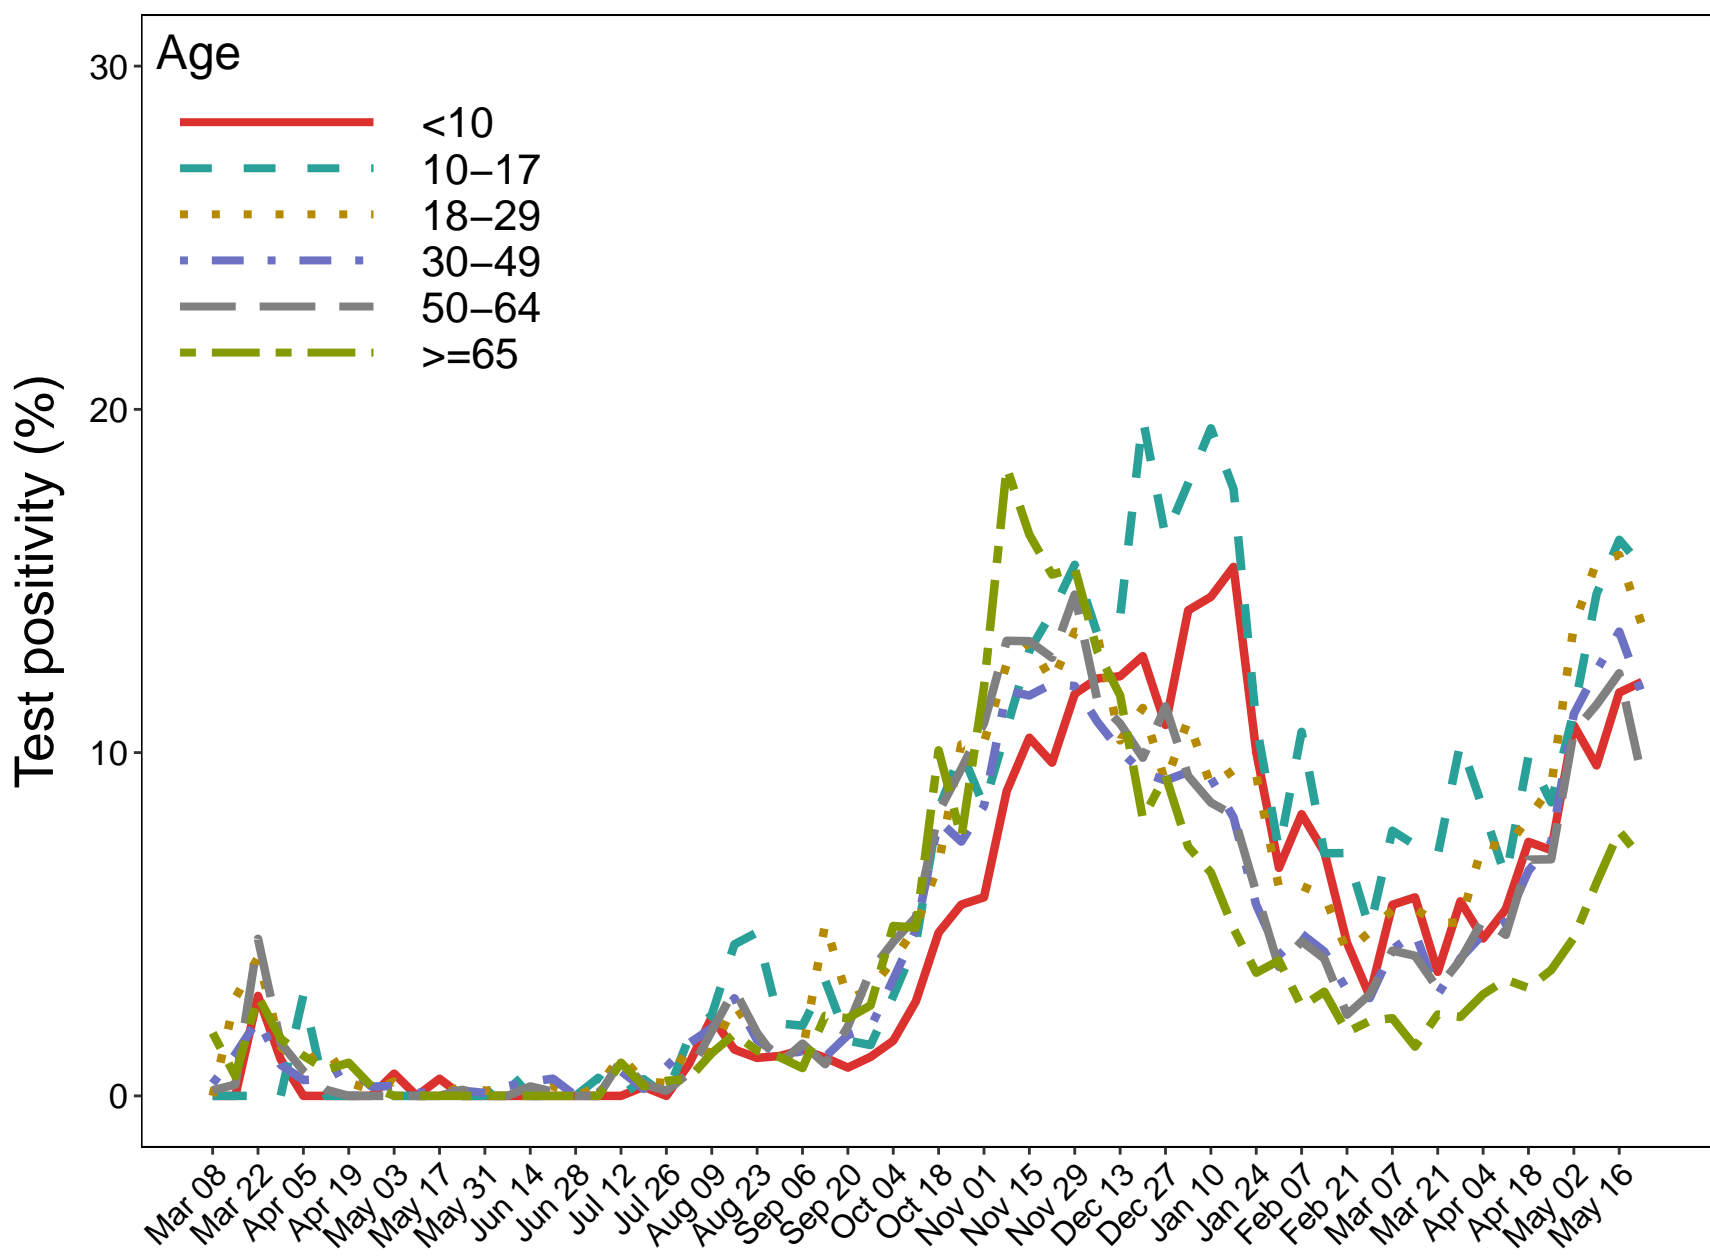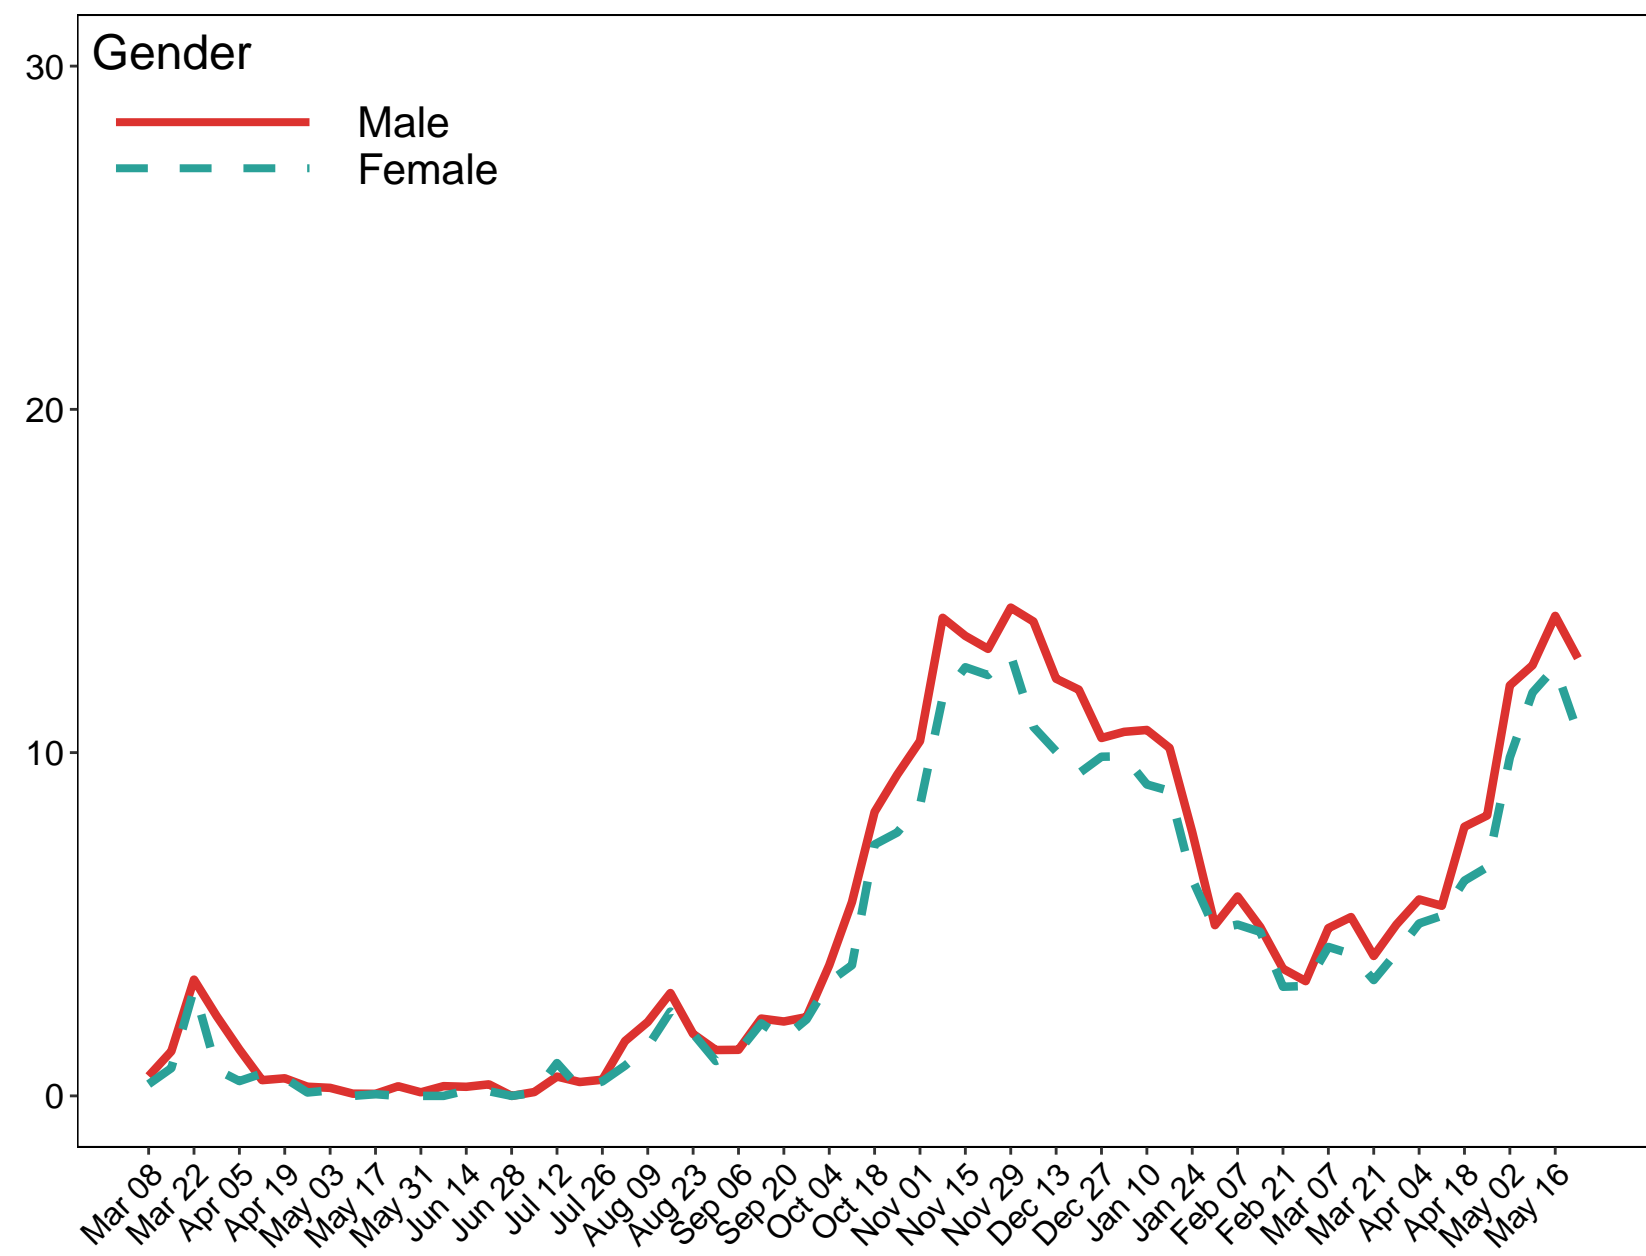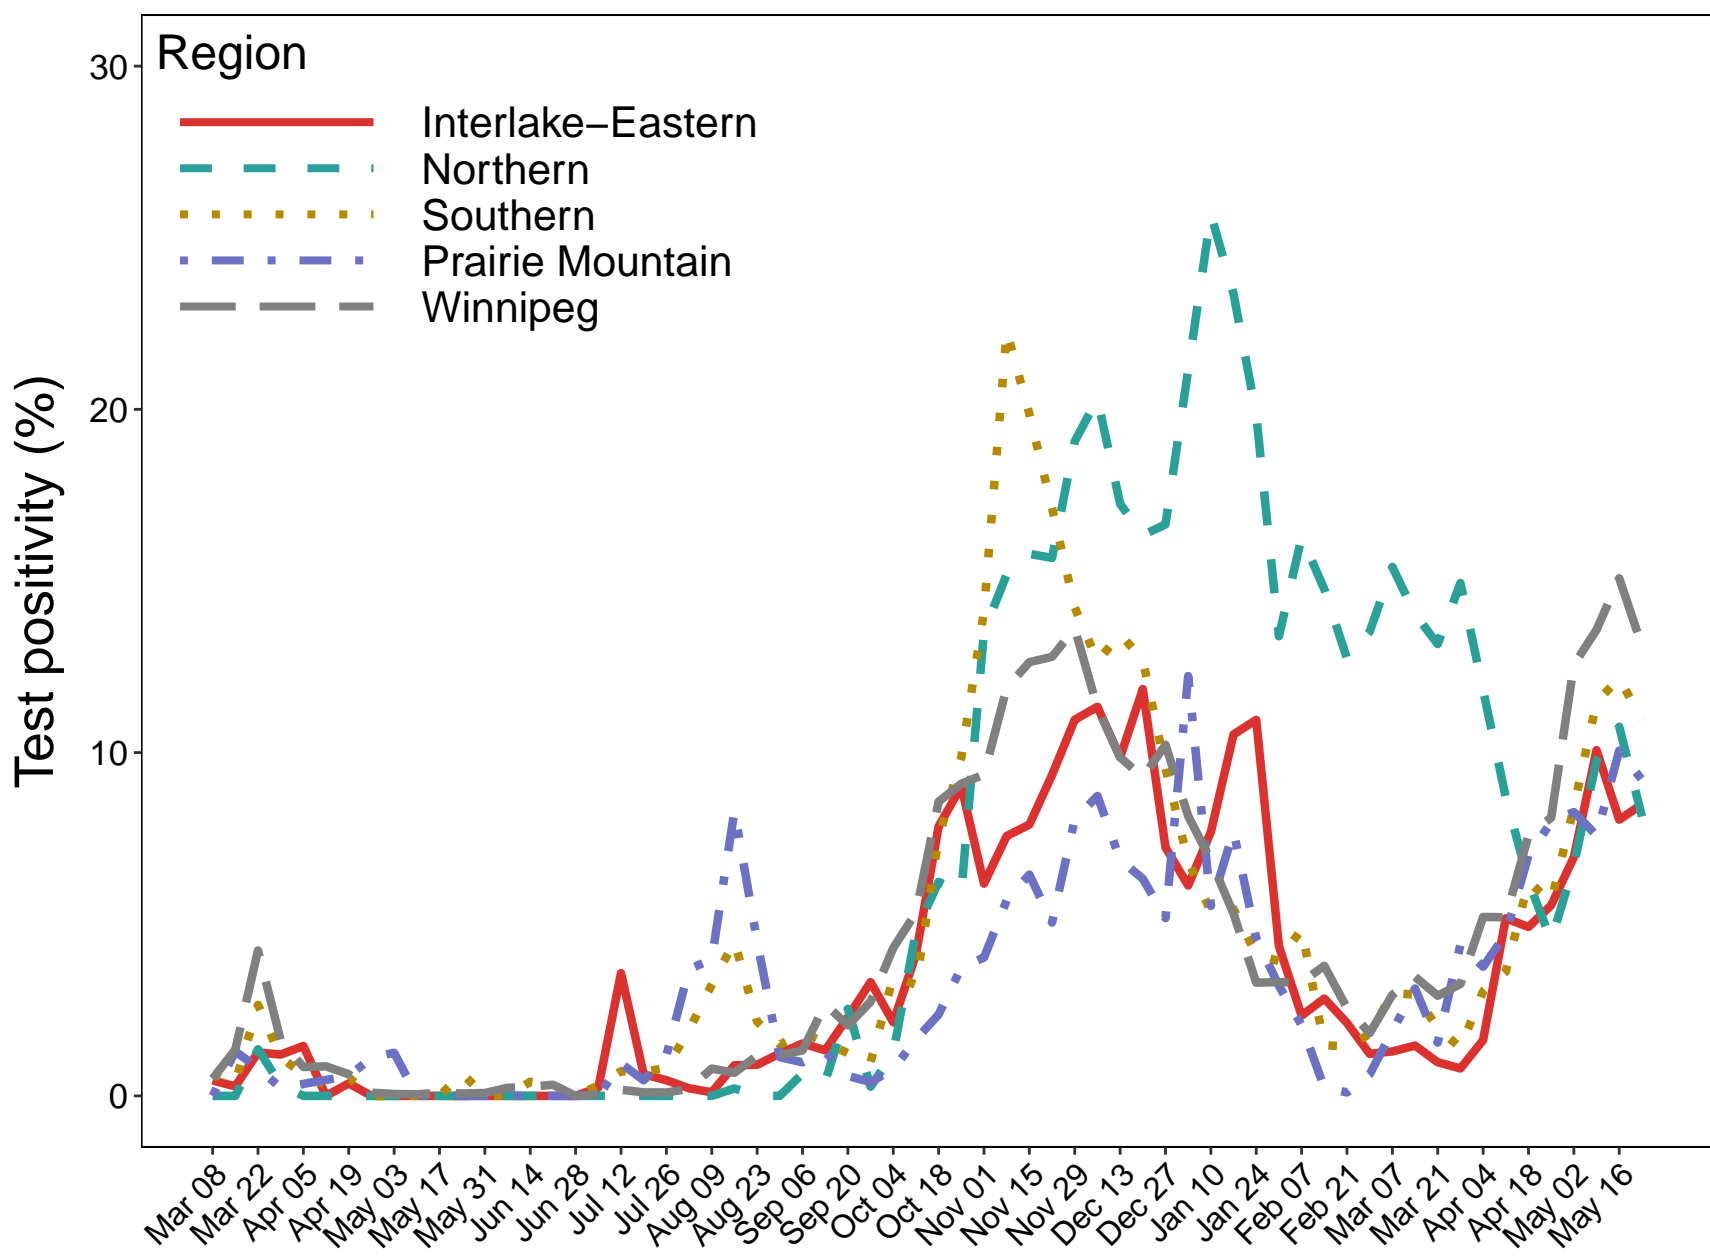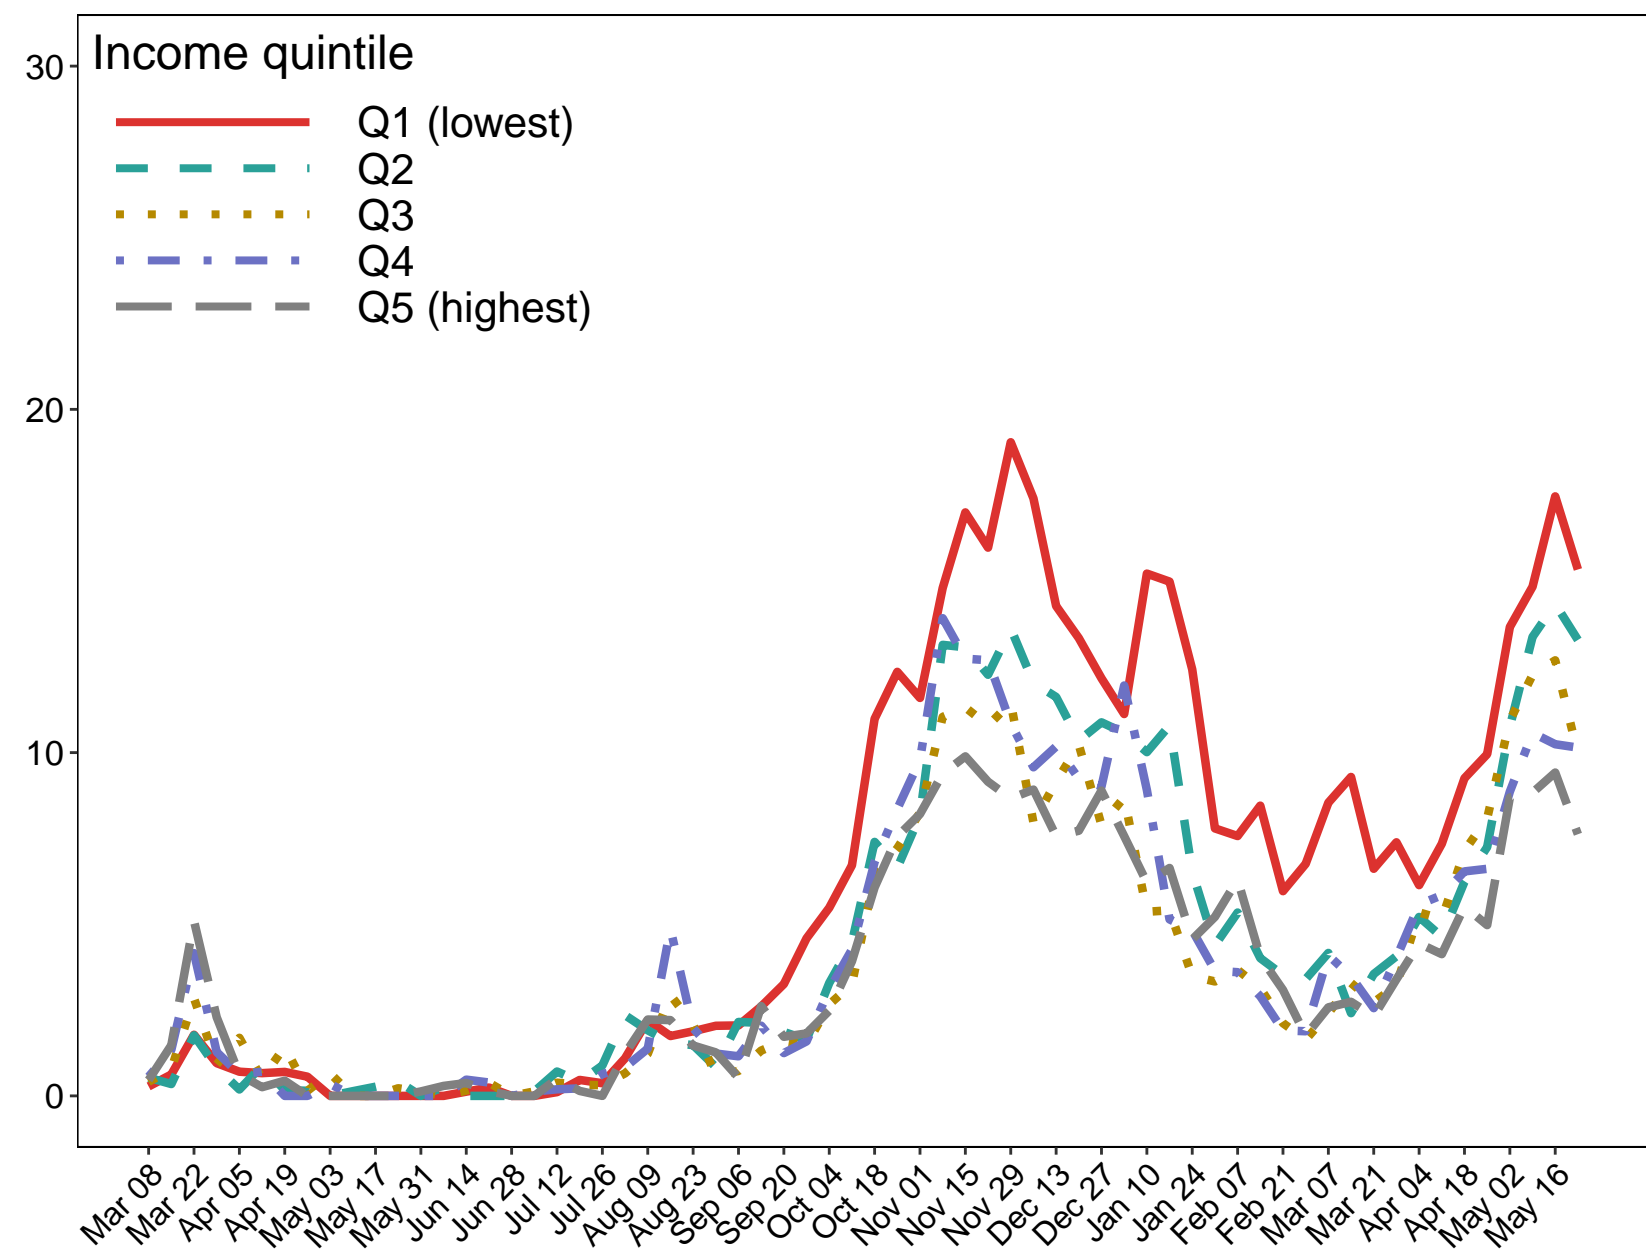



**Supplementary tables**

**Supplementary Table 1 Testing and incidence rates (per 1,000 person-years) and test positivity (95% confidence interval) according to certain socio-economic and clinical characteristics and pandemic stage**

|                                               | First wave <sup>a</sup> |                |                     | Summer wave <sup>b</sup> |                |                     |
|-----------------------------------------------|-------------------------|----------------|---------------------|--------------------------|----------------|---------------------|
|                                               | Testing rate            | Incidence rate | Test positivity (%) | Testing rate             | Incidence rate | Test positivity (%) |
| Total                                         | 128 (126-129)           | 1.7 (1.5-2.0)  | 1.4 (1.2-1.5)       | 248 (247-249)            | 2.7 (2.6-2.9)  | 1.1 (1.1-1.2)       |
| <b>Age</b>                                    |                         |                |                     |                          |                |                     |
| <10                                           | 49 (46-52)              | 0.2 (0.1-0.6)  | 0.5 (0.2-1.3)       | 174 (171-177)            | 1.3 (1.1-1.6)  | 0.7 (0.6-0.9)       |
| 10-17                                         | 25 (22-27)              | 0.1 (0.0-0.5)  | 0.3 (0.0-2.2)       | 151 (148-154)            | 2.8 (2.4-3.2)  | 1.8 (1.6-2.1)       |
| 18-29                                         | 124 (119-129)           | 2.6 (2.0-3.4)  | 2.1 (1.6-2.8)       | 298 (295-301)            | 4.4 (4.1-4.9)  | 1.5 (1.4-1.6)       |
| 30-49                                         | 179 (174-183)           | 1.8 (1.4-2.3)  | 1.0 (0.8-1.3)       | 297 (294-299)            | 3.3 (3.1-3.6)  | 1.1 (1.0-1.2)       |
| 50-64                                         | 172 (167-177)           | 2.5 (1.9-3.2)  | 1.4 (1.1-1.9)       | 238 (235-241)            | 2.2 (2.0-2.5)  | 0.9 (0.8-1.1)       |
| ≥65                                           | 120 (116-125)           | 2.0 (1.4-2.6)  | 1.6 (1.2-2.2)       | 251 (248-254)            | 1.8 (1.6-2.1)  | 0.7 (0.6-0.8)       |
| <b>Female</b>                                 |                         |                |                     |                          |                |                     |
| Male                                          | 96 (93-98)              | 1.7 (1.4-2.1)  | 1.8 (1.5-2.1)       | 220 (218-221)            | 2.7 (2.5-2.9)  | 1.2 (1.2-1.3)       |
| Female                                        | 159 (156-162)           | 1.7 (1.5-2.1)  | 1.1 (0.9-1.3)       | 276 (274-278)            | 2.8 (2.6-3.0)  | 1.0 (0.9-1.1)       |
| <b>Income quintile</b>                        |                         |                |                     |                          |                |                     |
| Q1 (lowest)                                   | 109 (105-113)           | 1.0 (0.7-1.4)  | 0.9 (0.6-1.3)       | 241 (239-244)            | 3.2 (2.9-3.5)  | 1.3 (1.2-1.4)       |
| Q2                                            | 117 (113-121)           | 0.8 (0.6-1.3)  | 0.7 (0.5-1.1)       | 246 (243-248)            | 2.7 (2.5-3.0)  | 1.1 (1.0-1.2)       |
| Q3                                            | 125 (121-130)           | 1.6 (1.2-2.2)  | 1.3 (0.9-1.7)       | 247 (244-250)            | 2.3 (2.0-2.5)  | 0.9 (0.8-1.0)       |
| Q4                                            | 131 (127-136)           | 2.3 (1.8-2.9)  | 1.7 (1.3-2.2)       | 249 (247-252)            | 2.8 (2.5-3.1)  | 1.1 (1.0-1.2)       |
| Q5 (highest)                                  | 147 (143-152)           | 3.1 (2.5-3.8)  | 2.1 (1.7-2.6)       | 251 (248-253)            | 2.6 (2.3-2.9)  | 1.0 (0.9-1.1)       |
| Unknown                                       | 174 (161-187)           | 1.0 (0.4-2.6)  | 0.6 (0.2-1.5)       | 282 (275-289)            | 3.9 (3.2-4.8)  | 1.4 (1.1-1.7)       |
| <b>Regional health authority of residence</b> |                         |                |                     |                          |                |                     |
| Interlake-Eastern                             | 143 (136-150)           | 1.4 (0.9-2.2)  | 1.0 (0.6-1.6)       | 241 (237-245)            | 2.1 (1.8-2.5)  | 0.9 (0.7-1.0)       |
| Northern                                      | 144 (135-153)           | 0.4 (0.1-1.2)  | 0.3 (0.1-0.9)       | 264 (259-270)            | 0.5 (0.3-0.8)  | 0.2 (0.1-0.3)       |
| Southern                                      | 107 (102-111)           | 1.1 (0.7-1.7)  | 1.0 (0.7-1.5)       | 228 (225-231)            | 3.1 (2.8-3.5)  | 1.4 (1.2-1.5)       |
| Prairie Mountain                              | 105 (101-110)           | 0.5 (0.3-1.0)  | 0.5 (0.3-1.0)       | 275 (271-278)            | 5.9 (5.3-6.4)  | 2.1 (1.9-2.3)       |
| Winnipeg                                      | 133 (131-136)           | 2.4 (2.0-2.7)  | 1.8 (1.5-2.0)       | 246 (245-248)            | 2.3 (2.1-2.4)  | 0.9 (0.9-1.0)       |
| Public Trustee / In CFS care                  | 204 (170-244)           | 0.0 (0.0-3.0)  | 0.0 (0.0-3.0)       | 339 (319-362)            | 4.9 (2.9-8.3)  | 1.4 (0.9-2.4)       |
| In long-term care                             | 592 (541-648)           | 1.3 (0.2-8.9)  | 0.2 (0.0-1.5)       | 649 (623-675)            | 7.6 (5.2-11.0) | 1.2 (0.8-1.7)       |
| Any chronic disease                           | 180 (175-185)           | 2.2 (1.7-2.9)  | 1.2 (0.9-1.6)       | 329 (326-332)            | 2.6 (2.3-2.9)  | 0.8 (0.7-0.9)       |
| Immunosuppressed                              | 212 (202-224)           | 2.8 (1.8-4.3)  | 1.3 (0.8-2.0)       | 392 (385-398)            | 2.6 (2.1-3.2)  | 0.7 (0.5-0.8)       |
| Use of ARBs/ACEIs <sup>c</sup>                | 145 (140-151)           | 2.0 (1.4-2.8)  | 1.4 (1.0-1.9)       | 271 (268-275)            | 2.5 (2.2-2.9)  | 0.9 (0.8-1.1)       |
| Use of proton-pump inhibitors                 | 215 (207-223)           | 2.1 (1.5-3.1)  | 1.0 (0.7-1.5)       | 398 (393-404)            | 3.1 (2.7-3.6)  | 0.8 (0.7-0.9)       |
| <b>COVID-19 vaccination status</b>            |                         |                |                     |                          |                |                     |
| Unvaccinated                                  | 128 (126-129)           | 1.7 (1.5-2.0)  | 1.4 (1.2-1.5)       | 248 (247-249)            | 2.7 (2.6-2.9)  | 1.1 (1.1-1.2)       |
| ≥14 days after first dose                     | N/A                     | N/A            | N/A                 | N/A                      | N/A            | N/A                 |
| ≥7 days after second dose                     | N/A                     | N/A            | N/A                 | N/A                      | N/A            | N/A                 |
| <b>No. of physician visits in 2019</b>        |                         |                |                     |                          |                |                     |
| 0                                             | 52 (49-55)              | 0.8 (0.5-1.3)  | 1.6 (1.0-2.6)       | 120 (118-122)            | 2.3 (2.0-2.6)  | 1.9 (1.7-2.1)       |
| 1-3                                           | 92 (89-95)              | 1.6 (1.3-2.1)  | 1.8 (1.4-2.3)       | 201 (199-203)            | 2.8 (2.5-3.0)  | 1.4 (1.3-1.5)       |
| 4-8                                           | 134 (130-138)           | 1.9 (1.5-2.4)  | 1.4 (1.1-1.8)       | 256 (254-259)            | 2.8 (2.6-3.1)  | 1.1 (1.0-1.2)       |
| ≥9                                            | 200 (196-205)           | 2.2 (1.8-2.7)  | 1.1 (0.9-1.4)       | 363 (361-366)            | 2.9 (2.7-3.2)  | 0.8 (0.7-0.9)       |
| <b>No. of hospitalizations in 2019</b>        |                         |                |                     |                          |                |                     |
| 0                                             | 123 (121-125)           | 1.7 (1.5-2.0)  | 1.4 (1.2-1.6)       | 238 (237-239)            | 2.8 (2.6-2.9)  | 1.2 (1.1-1.2)       |
| 1                                             | 160 (151-169)           | 1.2 (0.6-2.3)  | 0.7 (0.4-1.5)       | 354 (348-361)            | 2.6 (2.1-3.2)  | 0.7 (0.6-0.9)       |
| ≥2                                            | 323 (296-352)           | 3.2 (1.3-7.6)  | 1.0 (0.4-2.3)       | 607 (590-625)            | 2.9 (1.9-4.4)  | 0.5 (0.3-0.7)       |

<sup>a</sup> The first wave is from March 8 to April 11, 2020. <sup>b</sup> The summer wave is from April 12 to September 30, 2020. <sup>c</sup> ARBs/ACEIs: Angiotensin receptor blockers and angiotensin converting enzyme inhibitors.

**Supplementary Table 2 Testing and incidence rates (per 1,000 person-years) and test positivity (95% confidence interval) according to certain socio-economic and clinical characteristics and pandemic stage**

|                                        | Second wave <sup>a</sup> |                     |                     | Third wave <sup>b</sup> |                     |                     |
|----------------------------------------|--------------------------|---------------------|---------------------|-------------------------|---------------------|---------------------|
|                                        | Testing rate             | Incidence rate      | Test positivity (%) | Testing rate            | Incidence rate      | Test positivity (%) |
| Total                                  | 530 (528-532)            | 48.6 (48.0-49.2)    | 9.2 (9.1-9.3)       | 614 (612-617)           | 49.8 (49.1-50.5)    | 8.1 (8.0-8.2)       |
| Age                                    |                          |                     |                     |                         |                     |                     |
| <10                                    | 418 (413-423)            | 34.7 (33.3-36.1)    | 8.3 (8.0-8.6)       | 719 (711-727)           | 57.3 (55.1-59.5)    | 8.0 (7.7-8.3)       |
| 10-17                                  | 428 (423-434)            | 47.9 (46.2-49.8)    | 11.2 (10.8-11.6)    | 600 (592-608)           | 64.1 (61.5-66.9)    | 10.7 (10.3-11.1)    |
| 18-29                                  | 632 (627-637)            | 61.2 (59.6-62.8)    | 9.7 (9.4-9.9)       | 698 (691-705)           | 71.9 (69.7-74.1)    | 10.3 (10.0-10.6)    |
| 30-49                                  | 615 (611-619)            | 51.6 (50.5-52.8)    | 8.4 (8.2-8.6)       | 689 (684-694)           | 55.2 (53.7-56.8)    | 8.0 (7.8-8.2)       |
| 50-64                                  | 487 (483-491)            | 45.5 (44.3-46.8)    | 9.4 (9.1-9.6)       | 497 (492-503)           | 36.6 (35.2-38.1)    | 7.4 (7.1-7.7)       |
| ≥65                                    | 505 (500-510)            | 47.1 (45.7-48.5)    | 9.3 (9.0-9.6)       | 477 (472-483)           | 18.7 (17.6-19.9)    | 3.9 (3.7-4.2)       |
| Female                                 |                          |                     |                     |                         |                     |                     |
| Male                                   | 484 (481-486)            | 47.8 (47.0-48.6)    | 9.9 (9.7-10.1)      | 568 (564-572)           | 50.1 (49.1-51.2)    | 8.8 (8.6-9.0)       |
| Female                                 | 576 (573-579)            | 49.3 (48.5-50.2)    | 8.6 (8.4-8.7)       | 661 (657-664)           | 49.5 (48.5-50.5)    | 7.5 (7.3-7.7)       |
| Income quintile                        |                          |                     |                     |                         |                     |                     |
| Q1 (lowest)                            | 624 (619-629)            | 79.1 (77.4-80.8)    | 12.7 (12.4-12.9)    | 725 (718-732)           | 80.6 (78.5-82.9)    | 11.1 (10.8-11.4)    |
| Q2                                     | 528 (524-532)            | 47.9 (46.7-49.2)    | 9.1 (8.8-9.3)       | 639 (633-645)           | 53.7 (52.0-55.4)    | 8.4 (8.1-8.7)       |
| Q3                                     | 491 (487-495)            | 36.3 (35.2-37.4)    | 7.4 (7.2-7.6)       | 572 (567-578)           | 43.5 (41.9-45.1)    | 7.6 (7.3-7.9)       |
| Q4                                     | 495 (491-499)            | 41.7 (40.6-43.0)    | 8.4 (8.2-8.7)       | 566 (560-571)           | 40.0 (38.6-41.6)    | 7.1 (6.8-7.3)       |
| Q5 (highest)                           | 489 (485-493)            | 33.6 (32.5-34.7)    | 6.9 (6.6-7.1)       | 566 (560-571)           | 32.3 (31.0-33.7)    | 5.7 (5.5-6.0)       |
| Unknown                                | 664 (654-675)            | 74.1 (70.6-77.8)    | 11.2 (10.6-11.7)    | 654 (640-667)           | 49.0 (45.4-52.8)    | 7.5 (7.0-8.1)       |
| Regional health authority of residence |                          |                     |                     |                         |                     |                     |
| Interlake-Eastern                      | 529 (523-535)            | 38.9 (37.3-40.6)    | 7.4 (7.1-7.7)       | 560 (552-568)           | 30.1 (28.3-32.0)    | 5.4 (5.1-5.7)       |
| Northern                               | 956 (946-967)            | 153.5 (149.2-157.9) | 16.0 (15.6-16.5)    | 1,084 (1,069-1,099)     | 117.0 (112.2-122.0) | 10.8 (10.4-11.3)    |
| Southern                               | 429 (425-433)            | 46.7 (45.3-48.2)    | 10.9 (10.6-11.2)    | 459 (453-465)           | 31.7 (30.2-33.2)    | 6.9 (6.6-7.2)       |
| Prairie Mountain                       | 410 (406-415)            | 20.2 (19.1-21.2)    | 4.9 (4.7-5.2)       | 511 (504-518)           | 31.1 (29.5-32.8)    | 6.1 (5.8-6.4)       |
| Winnipeg                               | 539 (537-542)            | 46.1 (45.3-46.8)    | 8.5 (8.4-8.7)       | 643 (639-646)           | 55.7 (54.7-56.8)    | 8.7 (8.5-8.8)       |
| Public Trustee / In CFS care           | 1,021 (981-1,062)        | 144.4 (129.9-160.4) | 14.1 (12.7-15.7)    | 885 (838-936)           | 72.7 (59.9-88.1)    | 8.2 (6.8-10.0)      |
| In long-term care                      | 2,384 (2,327-2,442)      | 394.9 (372.1-419.0) | 16.6 (15.6-17.6)    | 975 (926-1,027)         | 11.6 (7.2-18.7)     | 1.2 (0.7-1.9)       |
| Any chronic disease                    | 711 (706-716)            | 68.4 (66.8-69.9)    | 9.6 (9.4-9.8)       | 717 (711-724)           | 44.4 (42.8-46.0)    | 6.2 (6.0-6.4)       |
| Immunosuppressed                       | 729 (719-739)            | 49.2 (46.7-51.8)    | 6.7 (6.4-7.1)       | 769 (756-782)           | 40.5 (37.6-43.6)    | 5.3 (4.9-5.7)       |
| Use of ARBs/ACEIs <sup>c</sup>         | 579 (573-584)            | 57.8 (56.1-59.6)    | 10.0 (9.7-10.3)     | 579 (572-586)           | 35.2 (33.5-37.0)    | 6.1 (5.8-6.4)       |
| Use of proton-pump inhibitors          | 809 (802-817)            | 68.2 (66.0-70.5)    | 8.4 (8.1-8.7)       | 820 (811-830)           | 47.0 (44.7-49.4)    | 5.7 (5.5-6.0)       |
| COVID-19 vaccination status            |                          |                     |                     |                         |                     |                     |
| Unvaccinated                           | 529 (527-531)            | 48.7 (48.2-49.3)    | 9.2 (9.1-9.3)       | 608 (605-611)           | 54.5 (53.7-55.4)    | 9.0 (8.8-9.1)       |
| ≥14 days after first dose              | 1,212 (1,159-1,267)      | 32.3 (24.6-42.4)    | 2.7 (2.0-3.5)       | 624 (616-632)           | 28.7 (27.1-30.4)    | 4.6 (4.3-4.9)       |
| ≥7 days after second dose              | 371 (339-406)            | 1.6 (0.4-6.2)       | 0.4 (0.1-1.7)       | 722 (708-736)           | 10.7 (9.2-12.5)     | 1.5 (1.3-1.7)       |
| No. of physician visits in 2019        |                          |                     |                     |                         |                     |                     |
| 0                                      | 330 (326-333)            | 41.1 (39.9-42.4)    | 12.5 (12.1-12.9)    | 423 (418-428)           | 51.6 (49.9-53.3)    | 12.2 (11.8-12.6)    |
| 1-3                                    | 468 (465-472)            | 47.2 (46.1-48.3)    | 10.1 (9.9-10.3)     | 582 (577-587)           | 53.9 (52.5-55.5)    | 9.3 (9.0-9.5)       |
| 4-8                                    | 534 (531-538)            | 45.5 (44.5-46.6)    | 8.5 (8.3-8.7)       | 630 (625-636)           | 49.0 (47.6-50.5)    | 7.8 (7.6-8.0)       |
| ≥9                                     | 719 (715-723)            | 57.8 (56.6-59.0)    | 8.0 (7.9-8.2)       | 763 (758-769)           | 45.3 (44.0-46.7)    | 5.9 (5.8-6.1)       |
| No. of hospitalizations in 2019        |                          |                     |                     |                         |                     |                     |
| 0                                      | 508 (506-510)            | 46.7 (46.1-47.3)    | 9.2 (9.1-9.3)       | 593 (590-595)           | 49.3 (48.5-50.0)    | 8.3 (8.2-8.4)       |
| 1                                      | 781 (770-791)            | 68.6 (65.6-71.7)    | 8.8 (8.4-9.2)       | 892 (878-907)           | 58.8 (55.3-62.6)    | 6.6 (6.2-7.0)       |
| ≥2                                     | 1,320 (1,292-1,349)      | 122.7 (114.3-131.7) | 9.3 (8.7-10.0)      | 1,255 (1,220-1,292)     | 54.2 (47.2-62.2)    | 4.3 (3.8-5.0)       |

<sup>a</sup> The second wave is from October 1, 2020 to Feb 28, 2021. <sup>b</sup> The third wave is from March 1, 2021 to June 1, 2021. <sup>c</sup> ARBs/ACEIs: Angiotensin receptor blockers and angiotensin converting enzyme inhibitors.

**Supplementary Table 3 Number (percentage) of COVID-19 outcomes by age and pandemic stage**

|                      | <b>First wave<sup>a</sup></b> | <b>Second wave<sup>b</sup></b> | <b>Third wave<sup>c</sup></b> |
|----------------------|-------------------------------|--------------------------------|-------------------------------|
|                      | <b>(N=230)</b>                | <b>(N=27,885)</b>              | <b>(N=17,520)</b>             |
| <b>Hospitalized</b>  |                               |                                |                               |
| Overall              | 21 (9.1%)                     | 2,093 (7.5%)                   | 1,073 (6.1%)                  |
| <10                  | S <sup>d</sup>                | 9 (0.4%)                       | 11 (0.4%)                     |
| 10-17                | S <sup>d</sup>                | 24 (0.9%)                      | 18 (0.8%)                     |
| 18-29                | S <sup>d</sup>                | 164 (2.9%)                     | 147 (3.6%)                    |
| 30-49                | S <sup>d</sup>                | 335 (4.3%)                     | 291 (5.7%)                    |
| 50-64                | 9 (14.5%)                     | 433 (8.9%)                     | 293 (12.3%)                   |
| ≥65                  | 10 (23.8%)                    | 1,122 (26.6%)                  | 311 (30.3%)                   |
| <b>ICU admission</b> |                               |                                |                               |
| Overall              | 11 (4.8%)                     | 393 (1.4%)                     | 294 (1.7%)                    |
| <10                  | S <sup>d</sup>                | S <sup>d</sup>                 | S <sup>d</sup>                |
| 10-17                | S <sup>d</sup>                | S <sup>d</sup>                 | S <sup>d</sup>                |
| 18-29                | S <sup>d</sup>                | 15 (0.3%)                      | 24 (0.6%)                     |
| 30-49                | S <sup>d</sup>                | 69 (0.9%)                      | 101 (2.0%)                    |
| 50-64                | S <sup>d</sup>                | 138 (2.9%)                     | 105 (4.4%)                    |
| ≥65                  | 7 (16.7%)                     | 170 (4.0%)                     | 61 (5.9%)                     |
| <b>Death</b>         |                               |                                |                               |
| Overall              | 6 (2.6%)                      | 865 (3.1%)                     | 122 (0.7%)                    |
| <10                  | S <sup>d</sup>                | S <sup>d</sup>                 | S <sup>d</sup>                |
| 10-17                | S <sup>d</sup>                | S <sup>d</sup>                 | S <sup>d</sup>                |
| 18-29                | S <sup>d</sup>                | S <sup>d</sup>                 | 6 (0.1%)                      |
| 30-49                | S <sup>d</sup>                | 39 (0.5%)                      | 14 (0.3%)                     |
| 50-64                | S <sup>d</sup>                | 85 (1.8%)                      | 35 (1.5%)                     |
| ≥65                  | S <sup>d</sup>                | 738 (17.5%)                    | 67 (6.5%)                     |

<sup>a</sup> The first wave is from March 8 to April 11, 2020. <sup>b</sup> The second wave is from October 1, 2020 to Feb 28, 2021. <sup>c</sup> The third wave is from March 1, 2021 to June 1, 2021.

<sup>d</sup> Suppressed because of small cell number as per provincial privacy guidelines.

**Supplementary Table 4 Weekly testing rates for SARS-CoV-2 per 1,000 person-years (95% confidence interval) according to age**

| Week                              | Overall       | <10           | 10-17         | 18-29               | 30-49               | 50-64         | ≥65           |
|-----------------------------------|---------------|---------------|---------------|---------------------|---------------------|---------------|---------------|
| March 8-14, 2020                  | 111 (107-115) | 80 (71-90)    | 42 (35-51)    | 99 (90-109)         | 142 (134-151)       | 144 (133-154) | 102 (93-112)  |
| March 15-21, 2020                 | 143 (138-147) | 77 (68-86)    | 35 (29-43)    | 138 (127-150)       | 177 (168-188)       | 204 (191-217) | 138 (128-150) |
| March 22-28, 2020                 | 119 (115-124) | 33 (27-39)    | 14 (11-20)    | 121 (111-132)       | 167 (157-176)       | 160 (150-172) | 125 (115-136) |
| March 29-April 4, 2020            | 161 (156-166) | 29 (24-36)    | 18 (13-24)    | 163 (151-176)       | 255 (243-267)       | 212 (200-226) | 137 (126-148) |
| April 5-11, 2020                  | 111 (107-115) | 29 (24-35)    | 15 (11-21)    | 105 (96-115)        | 164 (155-174)       | 146 (136-157) | 110 (101-121) |
| April 12-18, 2020                 | 93 (90-97)    | 28 (22-34)    | 18 (13-23)    | 94 (85-103)         | 126 (118-135)       | 125 (115-135) | 100 (91-109)  |
| April 19-25, 2020                 | 111 (107-115) | 37 (31-44)    | 36 (30-44)    | 133 (123-145)       | 142 (134-152)       | 140 (130-151) | 107 (98-117)  |
| April 26-May 2, 2020              | 145 (140-149) | 50 (43-58)    | 47 (39-56)    | 145 (134-157)       | 173 (163-183)       | 187 (175-199) | 184 (172-198) |
| May 3-9, 2020                     | 129 (124-133) | 49 (42-57)    | 41 (34-50)    | 126 (115-137)       | 161 (152-171)       | 158 (147-169) | 161 (150-174) |
| May 10-16, 2020                   | 149 (144-154) | 62 (54-71)    | 49 (41-58)    | 132 (122-144)       | 168 (159-178)       | 190 (178-203) | 217 (204-232) |
| May 17-23, 2020                   | 155 (150-160) | 65 (57-74)    | 55 (47-65)    | 150 (139-162)       | 161 (152-170)       | 184 (172-196) | 250 (235-265) |
| May 24-30, 2020                   | 198 (193-203) | 77 (68-87)    | 59 (50-69)    | 177 (165-190)       | 202 (191-212)       | 244 (231-258) | 342 (325-360) |
| May 31-June 6, 2020               | 174 (169-179) | 74 (66-84)    | 63 (54-73)    | 168 (156-181)       | 179 (170-189)       | 210 (197-223) | 275 (260-291) |
| June 7-13, 2020                   | 158 (153-163) | 63 (55-72)    | 55 (47-65)    | 174 (162-187)       | 160 (151-170)       | 188 (176-200) | 241 (227-257) |
| June 14-20, 2020                  | 142 (138-147) | 58 (50-66)    | 51 (43-60)    | 151 (140-163)       | 154 (145-163)       | 162 (151-174) | 216 (203-230) |
| June 21-27, 2020                  | 160 (156-165) | 73 (64-83)    | 65 (56-75)    | 173 (161-186)       | 181 (171-191)       | 177 (166-190) | 224 (210-238) |
| June 28-July 4, 2020              | 133 (129-138) | 68 (60-78)    | 52 (44-62)    | 159 (148-172)       | 142 (134-151)       | 144 (134-155) | 182 (170-195) |
| July 5-11, 2020                   | 162 (157-167) | 111 (100-123) | 79 (69-90)    | 185 (172-198)       | 182 (173-193)       | 165 (154-177) | 193 (180-207) |
| July 12-18, 2020                  | 214 (209-220) | 178 (164-193) | 109 (98-123)  | 265 (250-281)       | 259 (247-271)       | 190 (179-203) | 210 (197-224) |
| July 19-25, 2020                  | 293 (286-299) | 243 (227-260) | 168 (153-185) | 356 (339-375)       | 369 (355-383)       | 251 (237-265) | 272 (256-288) |
| July 26-August 1, 2020            | 326 (320-333) | 238 (222-255) | 214 (197-232) | 407 (388-426)       | 413 (398-428)       | 287 (273-302) | 295 (279-311) |
| August 2-8, 2020                  | 366 (359-374) | 274 (257-293) | 236 (218-255) | 511 (490-533)       | 465 (449-481)       | 291 (277-307) | 304 (288-321) |
| August 9-15, 2020                 | 407 (400-415) | 254 (237-271) | 273 (254-294) | 576 (554-600)       | 518 (501-535)       | 354 (338-371) | 328 (311-346) |
| August 16-22, 2020                | 387 (379-394) | 218 (203-235) | 240 (222-260) | 564 (542-587)       | 485 (469-502)       | 348 (332-365) | 326 (309-344) |
| August 23-29, 2020                | 357 (350-364) | 202 (188-218) | 253 (235-273) | 485 (465-506)       | 436 (421-452)       | 336 (320-352) | 319 (303-337) |
| August 30-September 5, 2020       | 354 (346-361) | 196 (181-211) | 198 (182-216) | 467 (447-488)       | 425 (410-441)       | 344 (328-360) | 360 (343-379) |
| September 6-12, 2020              | 313 (306-320) | 225 (209-241) | 201 (185-219) | 377 (359-396)       | 384 (370-399)       | 305 (290-320) | 287 (271-303) |
| September 13-19, 2020             | 416 (408-424) | 418 (397-440) | 401 (378-426) | 497 (476-518)       | 503 (487-520)       | 333 (317-349) | 304 (288-321) |
| September 20-26, 2020             | 476 (468-485) | 606 (580-633) | 455 (430-481) | 561 (539-584)       | 564 (547-582)       | 349 (333-366) | 315 (298-332) |
| September 27-October 3, 2020      | 550 (541-559) | 735 (707-765) | 561 (533-591) | 579 (556-602)       | 676 (657-696)       | 396 (379-414) | 351 (334-370) |
| October 4-10, 2020                | 536 (527-545) | 597 (571-623) | 512 (485-540) | 591 (568-614)       | 655 (636-674)       | 432 (414-451) | 386 (368-405) |
| October 11-17, 2020               | 546 (537-555) | 526 (502-551) | 527 (500-556) | 637 (613-661)       | 684 (665-703)       | 449 (431-468) | 379 (361-399) |
| October 18-24, 2020               | 643 (634-653) | 490 (467-514) | 609 (580-640) | 788 (762-815)       | 782 (762-803)       | 589 (568-611) | 492 (471-513) |
| October 25-31, 2020               | 799 (789-810) | 548 (524-574) | 731 (699-764) | 991 (961-1,021)     | 977 (954-1,000)     | 790 (765-815) | 588 (566-612) |
| November 1-7, 2020                | 887 (876-899) | 716 (688-745) | 885 (850-922) | 1,072 (1,041-1,103) | 1,072 (1,048-1,096) | 808 (783-833) | 652 (628-677) |
| November 8-14, 2020               | 727 (717-737) | 544 (520-570) | 662 (632-694) | 909 (881-938)       | 854 (832-876)       | 668 (646-691) | 610 (587-634) |
| November 15-21, 2020              | 760 (749-770) | 539 (515-565) | 625 (596-657) | 922 (894-952)       | 891 (870-914)       | 710 (687-734) | 719 (694-745) |
| November 22-28, 2020              | 672 (663-682) | 471 (449-495) | 542 (515-571) | 802 (775-829)       | 796 (775-817)       | 618 (597-640) | 663 (639-688) |
| November 29-December 5, 2020      | 596 (587-606) | 446 (424-470) | 474 (448-501) | 696 (672-722)       | 707 (688-727)       | 546 (526-567) | 581 (558-605) |
| December 6-12, 2020               | 561 (552-570) | 396 (375-418) | 447 (422-473) | 647 (624-672)       | 641 (623-660)       | 537 (517-558) | 589 (566-613) |
| December 13-19, 2020              | 520 (511-529) | 322 (303-342) | 355 (333-379) | 676 (652-702)       | 584 (566-602)       | 494 (475-514) | 560 (538-583) |
| December 20-26, 2020              | 357 (350-364) | 193 (179-209) | 222 (205-241) | 460 (440-480)       | 405 (390-420)       | 334 (318-350) | 427 (408-448) |
| December 27, 2020-January 2, 2021 | 352 (345-359) | 173 (159-188) | 209 (192-227) | 448 (428-468)       | 377 (363-392)       | 356 (339-373) | 452 (432-473) |
| January 3-9, 2021                 | 438 (431-446) | 273 (256-292) | 270 (251-291) | 560 (538-583)       | 485 (469-502)       | 421 (403-440) | 504 (483-526) |
| January 10-16, 2021               | 435 (427-443) | 325 (307-345) | 293 (272-314) | 519 (498-541)       | 477 (461-494)       | 415 (397-434) | 491 (470-513) |
| January 17-23, 2021               | 423 (416-431) | 351 (332-372) | 323 (302-346) | 512 (491-534)       | 463 (447-479)       | 405 (388-423) | 414 (395-434) |
| January 24-30, 2021               | 411 (404-419) | 341 (322-362) | 297 (277-319) | 469 (449-490)       | 461 (445-477)       | 378 (361-395) | 448 (428-469) |
| January 31-February 6, 2021       | 390 (383-398) | 351 (332-372) | 249 (231-269) | 451 (431-471)       | 420 (406-436)       | 348 (331-365) | 457 (437-478) |
| February 7-13, 2021               | 378 (371-386) | 345 (325-365) | 252 (233-272) | 422 (403-442)       | 424 (409-439)       | 338 (323-355) | 421 (401-441) |
| February 14-20, 2021              | 403 (395-411) | 404 (383-426) | 286 (266-307) | 432 (413-453)       | 428 (413-444)       | 349 (332-366) | 478 (457-499) |
| February 21-27, 2021              | 395 (387-402) | 425 (403-447) | 263 (244-284) | 413 (394-432)       | 432 (417-448)       | 354 (337-371) | 429 (409-449) |
| February 28-March 6, 2021         | 403 (396-411) | 491 (468-515) | 280 (260-301) | 409 (390-429)       | 428 (413-444)       | 351 (335-368) | 433 (413-454) |
| March 7-13, 2021                  | 422 (414-430) | 526 (502-551) | 300 (280-322) | 405 (386-424)       | 455 (439-471)       | 359 (342-376) | 460 (440-481) |
| March 14-20, 2021                 | 454 (446-462) | 551 (526-577) | 371 (348-395) | 457 (437-477)       | 503 (486-520)       | 374 (358-392) | 443 (423-464) |
| March 21-27, 2021                 | 481 (473-490) | 529 (505-554) | 425 (400-450) | 499 (478-521)       | 549 (532-567)       | 391 (374-409) | 464 (444-485) |
| March 28-April 3, 2021            | 396 (388-404) | 352 (333-373) | 280 (261-301) | 467 (447-488)       | 446 (431-462)       | 355 (339-372) | 401 (382-421) |

| <b>Week</b>          | <b>Overall</b> | <b>&lt;10</b>       | <b>10-17</b>        | <b>18-29</b>        | <b>30-49</b>        | <b>50-64</b>  | <b>≥65</b>    |
|----------------------|----------------|---------------------|---------------------|---------------------|---------------------|---------------|---------------|
| April 4-10, 2021     | 526 (517-535)  | 526 (502-551)       | 497 (470-524)       | 624 (601-648)       | 562 (545-580)       | 461 (442-480) | 470 (450-492) |
| April 11-17, 2021    | 643 (634-653)  | 707 (679-736)       | 679 (648-711)       | 726 (701-752)       | 725 (705-745)       | 543 (522-564) | 480 (459-501) |
| April 18-24, 2021    | 769 (759-780)  | 939 (907-973)       | 826 (792-862)       | 837 (810-865)       | 885 (864-908)       | 628 (606-651) | 514 (493-537) |
| April 25-May 1, 2021 | 875 (864-887)  | 1,197 (1,160-1,234) | 1,039 (1,000-1,079) | 920 (891-949)       | 1,003 (980-1,027)   | 637 (615-660) | 560 (537-583) |
| May 2-8, 2021        | 888 (876-899)  | 1,223 (1,186-1,262) | 998 (960-1,037)     | 987 (958-1,018)     | 1,026 (1,002-1,050) | 627 (605-649) | 544 (521-567) |
| May 9-15, 2021       | 889 (878-901)  | 1,079 (1,044-1,115) | 968 (930-1,006)     | 1,085 (1,054-1,117) | 1,003 (980-1,027)   | 676 (653-699) | 565 (542-588) |
| May 16-22, 2021      | 799 (788-809)  | 875 (844-908)       | 754 (722-789)       | 1,047 (1,016-1,078) | 882 (860-904)       | 666 (643-689) | 537 (515-560) |
| May 23-29, 2021      | 655 (645-665)  | 641 (615-669)       | 602 (572-632)       | 846 (818-874)       | 723 (703-744)       | 562 (541-584) | 511 (490-534) |

**Supplementary Table 5 Weekly testing rates for SARS-CoV-2 per 1,000 person-years (95% confidence interval) according to region**

| <b>Week</b>                       | <b>Overall</b> | <b>Interlake-Eastern</b> | <b>Northern</b>     | <b>Southern</b> | <b>Prairie Mountain</b> | <b>Winnipeg</b> |
|-----------------------------------|----------------|--------------------------|---------------------|-----------------|-------------------------|-----------------|
| March 8-14, 2020                  | 111 (107-115)  | 98 (87-111)              | 94 (80-111)         | 91 (82-101)     | 88 (79-99)              | 126 (121-132)   |
| March 15-21, 2020                 | 143 (138-147)  | 155 (141-171)            | 117 (101-136)       | 138 (127-150)   | 127 (116-140)           | 148 (142-154)   |
| March 22-28, 2020                 | 119 (115-124)  | 142 (128-158)            | 106 (91-124)        | 103 (93-113)    | 84 (75-95)              | 129 (123-135)   |
| March 29-April 4, 2020            | 161 (156-166)  | 210 (193-228)            | 221 (199-247)       | 122 (112-133)   | 141 (129-154)           | 161 (154-167)   |
| April 5-11, 2020                  | 111 (107-115)  | 112 (100-126)            | 194 (173-218)       | 88 (80-98)      | 93 (83-104)             | 110 (105-115)   |
| April 12-18, 2020                 | 93 (90-97)     | 90 (79-102)              | 166 (146-188)       | 84 (76-94)      | 75 (66-84)              | 93 (88-98)      |
| April 19-25, 2020                 | 111 (107-115)  | 114 (102-128)            | 181 (161-204)       | 103 (93-113)    | 114 (103-126)           | 104 (99-109)    |
| April 26-May 2, 2020              | 145 (140-149)  | 146 (132-162)            | 200 (179-224)       | 114 (104-125)   | 125 (113-137)           | 152 (146-158)   |
| May 3-9, 2020                     | 129 (124-133)  | 121 (108-135)            | 191 (170-214)       | 101 (92-112)    | 136 (124-149)           | 129 (123-135)   |
| May 10-16, 2020                   | 149 (144-154)  | 147 (133-163)            | 190 (169-214)       | 116 (106-127)   | 157 (144-171)           | 152 (146-158)   |
| May 17-23, 2020                   | 155 (150-160)  | 151 (136-166)            | 207 (185-231)       | 118 (108-129)   | 133 (121-146)           | 164 (157-170)   |
| May 24-30, 2020                   | 198 (193-203)  | 165 (150-182)            | 298 (271-327)       | 164 (152-177)   | 182 (168-197)           | 206 (199-213)   |
| May 31-June 6, 2020               | 174 (169-179)  | 174 (159-191)            | 263 (239-291)       | 152 (140-164)   | 156 (144-171)           | 173 (167-180)   |
| June 7-13, 2020                   | 158 (153-163)  | 169 (154-186)            | 282 (256-310)       | 128 (118-140)   | 147 (134-160)           | 153 (147-160)   |
| June 14-20, 2020                  | 142 (138-147)  | 144 (130-160)            | 227 (204-253)       | 129 (119-141)   | 122 (111-135)           | 141 (135-147)   |
| June 21-27, 2020                  | 160 (156-165)  | 161 (146-177)            | 221 (198-246)       | 165 (153-178)   | 147 (135-161)           | 156 (149-162)   |
| June 28-July 4, 2020              | 133 (129-138)  | 131 (117-145)            | 187 (166-210)       | 138 (127-150)   | 121 (110-134)           | 129 (123-135)   |
| July 5-11, 2020                   | 162 (157-167)  | 172 (157-189)            | 196 (175-220)       | 173 (161-186)   | 150 (138-164)           | 155 (149-161)   |
| July 12-18, 2020                  | 214 (209-220)  | 269 (250-290)            | 218 (196-243)       | 225 (211-240)   | 199 (184-215)           | 205 (198-212)   |
| July 19-25, 2020                  | 293 (286-299)  | 323 (302-346)            | 248 (224-275)       | 294 (278-311)   | 339 (320-360)           | 281 (273-290)   |
| July 26-August 1, 2020            | 326 (320-333)  | 358 (336-382)            | 258 (233-285)       | 360 (342-379)   | 445 (423-469)           | 293 (285-302)   |
| August 2-8, 2020                  | 366 (359-374)  | 366 (343-390)            | 277 (251-305)       | 429 (410-450)   | 547 (523-573)           | 319 (310-328)   |
| August 9-15, 2020                 | 407 (400-415)  | 389 (366-414)            | 352 (323-383)       | 409 (390-429)   | 681 (654-710)           | 355 (346-365)   |
| August 16-22, 2020                | 387 (379-394)  | 324 (302-346)            | 339 (311-370)       | 441 (421-462)   | 538 (513-563)           | 355 (345-364)   |
| August 23-29, 2020                | 357 (350-364)  | 269 (250-290)            | 392 (362-425)       | 335 (318-353)   | 512 (488-536)           | 341 (332-350)   |
| August 30-September 5, 2020       | 354 (346-361)  | 302 (282-324)            | 293 (267-322)       | 295 (279-313)   | 526 (502-551)           | 343 (334-353)   |
| September 6-12, 2020              | 313 (306-320)  | 287 (267-308)            | 332 (304-363)       | 239 (224-254)   | 296 (278-315)           | 339 (330-348)   |
| September 13-19, 2020             | 416 (408-424)  | 433 (408-459)            | 340 (312-371)       | 321 (304-339)   | 329 (310-349)           | 463 (452-474)   |
| September 20-26, 2020             | 476 (468-485)  | 419 (394-444)            | 339 (311-370)       | 359 (341-378)   | 337 (318-357)           | 558 (547-570)   |
| September 27-October 3, 2020      | 550 (541-559)  | 584 (555-614)            | 515 (480-553)       | 416 (397-437)   | 403 (382-425)           | 613 (600-625)   |
| October 4-10, 2020                | 536 (527-545)  | 677 (646-710)            | 533 (497-571)       | 402 (383-422)   | 416 (395-439)           | 569 (557-581)   |
| October 11-17, 2020               | 546 (537-555)  | 499 (472-527)            | 603 (565-644)       | 477 (457-499)   | 393 (372-415)           | 598 (586-610)   |
| October 18-24, 2020               | 643 (634-653)  | 621 (591-653)            | 928 (880-978)       | 526 (504-548)   | 397 (376-419)           | 702 (689-716)   |
| October 25-31, 2020               | 799 (789-810)  | 778 (745-813)            | 1,278 (1,222-1,336) | 637 (613-662)   | 529 (505-555)           | 857 (842-872)   |
| November 1-7, 2020                | 887 (876-899)  | 940 (903-978)            | 866 (820-914)       | 773 (746-800)   | 715 (687-744)           | 947 (931-962)   |
| November 8-14, 2020               | 727 (717-737)  | 661 (631-694)            | 864 (818-912)       | 689 (664-715)   | 537 (512-562)           | 771 (757-785)   |
| November 15-21, 2020              | 760 (749-770)  | 707 (675-741)            | 920 (873-970)       | 788 (762-816)   | 626 (600-654)           | 768 (754-782)   |
| November 22-28, 2020              | 672 (663-682)  | 610 (581-642)            | 951 (902-1,002)     | 618 (594-642)   | 533 (509-558)           | 696 (683-709)   |
| November 29-December 5, 2020      | 596 (587-606)  | 583 (554-613)            | 995 (945-1,047)     | 450 (429-471)   | 462 (439-486)           | 624 (611-637)   |
| December 6-12, 2020               | 561 (552-570)  | 616 (586-647)            | 917 (870-968)       | 420 (401-440)   | 448 (425-471)           | 575 (563-588)   |
| December 13-19, 2020              | 520 (511-529)  | 496 (469-524)            | 1,130 (1,077-1,186) | 430 (411-451)   | 397 (376-419)           | 512 (500-523)   |
| December 20-26, 2020              | 357 (350-364)  | 313 (292-336)            | 711 (669-756)       | 300 (284-317)   | 258 (242-276)           | 364 (354-374)   |
| December 27, 2020-January 2, 2021 | 352 (345-359)  | 351 (329-375)            | 646 (606-688)       | 285 (269-302)   | 280 (262-298)           | 354 (344-363)   |
| January 3-9, 2021                 | 438 (431-446)  | 428 (403-454)            | 1,151 (1,097-1,207) | 321 (304-338)   | 370 (350-391)           | 412 (402-423)   |
| January 10-16, 2021               | 435 (427-443)  | 380 (357-405)            | 1,379 (1,320-1,440) | 299 (282-316)   | 375 (354-396)           | 400 (390-410)   |
| January 17-23, 2021               | 423 (416-431)  | 454 (429-481)            | 1,385 (1,325-1,447) | 262 (247-279)   | 353 (333-374)           | 382 (373-392)   |
| January 24-30, 2021               | 411 (404-419)  | 485 (458-512)            | 1,105 (1,052-1,161) | 285 (269-302)   | 391 (370-413)           | 369 (359-378)   |
| January 31-February 6, 2021       | 390 (383-398)  | 409 (384-434)            | 959 (909-1,011)     | 298 (282-315)   | 363 (343-384)           | 361 (352-371)   |
| February 7-13, 2021               | 378 (371-386)  | 372 (349-396)            | 1,154 (1,100-1,211) | 275 (260-292)   | 279 (262-298)           | 352 (343-362)   |
| February 14-20, 2021              | 403 (395-411)  | 421 (397-447)            | 1,139 (1,085-1,196) | 282 (266-298)   | 284 (266-303)           | 387 (377-397)   |
| February 21-27, 2021              | 395 (387-402)  | 413 (389-439)            | 924 (875-975)       | 291 (275-309)   | 329 (310-349)           | 383 (373-393)   |
| February 28-March 6, 2021         | 403 (396-411)  | 390 (367-416)            | 1,044 (992-1,099)   | 296 (279-313)   | 324 (305-344)           | 389 (379-399)   |
| March 7-13, 2021                  | 422 (414-430)  | 397 (373-422)            | 1,230 (1,173-1,289) | 298 (282-315)   | 354 (335-375)           | 396 (386-406)   |
| March 14-20, 2021                 | 454 (446-462)  | 356 (334-380)            | 1,112 (1,058-1,168) | 347 (330-366)   | 404 (383-427)           | 448 (437-459)   |
| March 21-27, 2021                 | 481 (473-490)  | 404 (380-429)            | 1,033 (981-1,087)   | 333 (315-351)   | 398 (377-420)           | 500 (489-511)   |
| March 28-April 3, 2021            | 396 (388-404)  | 325 (304-348)            | 1,026 (974-1,081)   | 277 (261-293)   | 325 (306-345)           | 395 (385-406)   |

| <b>Week</b>          | <b>Overall</b> | <b>Interlake-Eastern</b> | <b>Northern</b>     | <b>Southern</b> | <b>Prairie Mountain</b> | <b>Winnipeg</b> |
|----------------------|----------------|--------------------------|---------------------|-----------------|-------------------------|-----------------|
| April 4-10, 2021     | 526 (517-535)  | 435 (410-461)            | 1,301 (1,242-1,362) | 379 (360-398)   | 450 (428-474)           | 525 (514-537)   |
| April 11-17, 2021    | 643 (634-653)  | 539 (512-569)            | 1,414 (1,353-1,478) | 410 (391-430)   | 567 (542-594)           | 669 (656-682)   |
| April 18-24, 2021    | 769 (759-780)  | 726 (694-760)            | 1,339 (1,280-1,401) | 501 (480-523)   | 636 (609-664)           | 823 (809-838)   |
| April 25-May 1, 2021 | 875 (864-887)  | 722 (690-756)            | 1,190 (1,134-1,248) | 582 (559-606)   | 768 (739-799)           | 973 (958-989)   |
| May 2-8, 2021        | 888 (876-899)  | 755 (722-790)            | 1,031 (979-1,086)   | 659 (634-684)   | 735 (707-765)           | 990 (974-1,006) |
| May 9-15, 2021       | 889 (878-901)  | 970 (933-1,009)          | 910 (861-961)       | 748 (722-775)   | 722 (694-752)           | 945 (929-960)   |
| May 16-22, 2021      | 799 (788-809)  | 837 (802-874)            | 1,016 (964-1,070)   | 719 (693-745)   | 598 (573-625)           | 835 (821-850)   |
| May 23-29, 2021      | 655 (645-665)  | 641 (610-673)            | 883 (835-934)       | 578 (555-602)   | 542 (518-568)           | 678 (665-691)   |

**Supplementary Table 6 Testing and incidence rates (per 1,000 person-years) and test positivity rate (95% confidence interval) according to certain socio-economic and clinical characteristics during the second<sup>a</sup> and third<sup>b</sup> waves by region and reason for testing**

|                                    | Northern            |                  | Southern           |                | Rest of Manitoba    |                  |
|------------------------------------|---------------------|------------------|--------------------|----------------|---------------------|------------------|
|                                    | Contact/outbreak    | Unknown          | Contact/outbreak   | Unknown        | Contact/outbreak    | Unknown          |
| <b>Testing rates</b>               |                     |                  |                    |                |                     |                  |
| Total                              | 348 (343-353)       | 95 (93-98)       | 28 (27-29)         | 77 (76-79)     | 49 (48-50)          | 117 (117-118)    |
| <b>Age</b>                         |                     |                  |                    |                |                     |                  |
| <10                                | 362 (351-374)       | 72 (67-78)       | 24 (22-26)         | 46 (43-48)     | 57 (56-59)          | 64 (62-66)       |
| 10-17                              | 379 (365-394)       | 53 (47-58)       | 31 (28-33)         | 35 (32-38)     | 66 (64-68)          | 60 (58-62)       |
| 18-29                              | 394 (382-407)       | 103 (96-109)     | 31 (29-34)         | 81 (77-85)     | 58 (56-59)          | 116 (114-118)    |
| 30-49                              | 354 (344-365)       | 106 (101-112)    | 30 (28-32)         | 90 (87-94)     | 50 (49-51)          | 117 (116-119)    |
| 50-64                              | 293 (281-306)       | 114 (107-122)    | 19 (18-21)         | 90 (87-94)     | 36 (35-37)          | 119 (117-120)    |
| ≥65                                | 223 (208-238)       | 152 (140-165)    | 33 (31-36)         | 109 (104-114)  | 40 (39-41)          | 189 (187-192)    |
| <b>Income quintile</b>             |                     |                  |                    |                |                     |                  |
| Q1 (lowest)                        | 676 (663-691)       | 122 (117-129)    | 32 (30-35)         | 68 (64-71)     | 79 (78-80)          | 145 (143-147)    |
| Q2                                 | 281 (273-290)       | 102 (97-107)     | 27 (25-30)         | 73 (70-77)     | 45 (44-46)          | 116 (114-118)    |
| Q3                                 | 246 (229-264)       | 79 (70-90)       | 26 (24-28)         | 76 (72-79)     | 38 (37-39)          | 112 (110-114)    |
| Q4                                 | 217 (207-227)       | 88 (82-95)       | 24 (23-26)         | 70 (67-72)     | 37 (36-38)          | 110 (108-112)    |
| Q5 (highest)                       | 157 (150-165)       | 62 (57-67)       | 25 (23-27)         | 95 (92-99)     | 36 (35-37)          | 103 (101-105)    |
| Unknown                            | 483 (362-645)       | 157 (95-261)     | 43 (39-48)         | 85 (79-91)     | 105 (101-109)       | 127 (123-132)    |
| In long-term care - second wave    | 2,005 (1,631-2,465) | 446 (287-691)    | 815 (726-916)      | 28 (15-53)     | 776 (741-812)       | 227 (209-247)    |
| In long-term care - third wave     | 41 (6-291)          | 82 (20-327)      | 227 (169-306)      | 74 (44-125)    | 193 (170-218)       | 225 (200-253)    |
| <b>COVID-19 vaccination status</b> |                     |                  |                    |                |                     |                  |
| Unvaccinated                       | 349 (344-355)       | 91 (88-94)       | 27 (26-28)         | 72 (70-73)     | 48 (48-49)          | 112 (111-113)    |
| ≥14 days after first dose          | 353 (331-377)       | 146 (132-162)    | 29 (25-34)         | 182 (171-195)  | 57 (54-59)          | 196 (191-201)    |
| ≥7 days after second dose          | 298 (271-328)       | 149 (130-170)    | 70 (58-84)         | 225 (203-249)  | 62 (58-67)          | 215 (207-223)    |
| <b>Incidence rates</b>             |                     |                  |                    |                |                     |                  |
| Total                              | 77.0 (74.6-79.5)    | 6.0 (5.3-6.7)    | 3.8 (3.5-4.2)      | 3.5 (3.2-3.8)  | 6.8 (6.6-7.0)       | 5.1 (5.0-5.3)    |
| <b>Age</b>                         |                     |                  |                    |                |                     |                  |
| <10                                | 96.4 (90.5-102.6)   | 3.8 (2.8-5.2)    | 2.7 (2.1-3.5)      | 0.6 (0.4-1.1)  | 9.7 (9.1-10.4)      | 3.1 (2.7-3.5)    |
| 10-17                              | 92.3 (85.4-99.6)    | 3.0 (2.0-4.6)    | 3.9 (3.1-5.0)      | 2.3 (1.7-3.1)  | 10.0 (9.3-10.8)     | 5.1 (4.6-5.7)    |
| 18-29                              | 91.8 (85.8-98.2)    | 8.0 (6.3-10.0)   | 4.9 (4.0-5.9)      | 4.7 (3.9-5.7)  | 7.7 (7.2-8.2)       | 7.5 (7.0-8.0)    |
| 30-49                              | 66.0 (61.5-70.8)    | 8.1 (6.6-9.9)    | 4.0 (3.4-4.7)      | 4.6 (3.9-5.3)  | 5.8 (5.5-6.1)       | 6.5 (6.2-6.9)    |
| 50-64                              | 56.6 (51.4-62.3)    | 7.2 (5.5-9.4)    | 2.7 (2.1-3.4)      | 4.7 (3.9-5.7)  | 4.8 (4.5-5.2)       | 4.7 (4.4-5.1)    |
| ≥65                                | 36.7 (31.0-43.3)    | 3.4 (2.0-5.9)    | 5.2 (4.3-6.4)      | 3.3 (2.5-4.2)  | 6.3 (5.8-6.7)       | 2.6 (2.3-2.9)    |
| <b>Income quintile</b>             |                     |                  |                    |                |                     |                  |
| Q1 (lowest)                        | 167.8 (161.0-174.9) | 6.6 (5.4-8.1)    | 5.2 (4.3-6.2)      | 3.9 (3.2-4.9)  | 14.3 (13.7-14.9)    | 7.8 (7.3-8.2)    |
| Q2                                 | 55.8 (52.2-59.8)    | 4.8 (3.8-6.0)    | 2.8 (2.1-3.6)      | 2.4 (1.8-3.2)  | 5.9 (5.5-6.3)       | 5.7 (5.3-6.1)    |
| Q3                                 | 46.7 (39.7-54.9)    | 4.5 (2.7-7.6)    | 5.1 (4.3-6.1)      | 3.5 (2.8-4.4)  | 4.5 (4.2-4.9)       | 4.0 (3.7-4.4)    |
| Q4                                 | 46.5 (42.1-51.4)    | 7.8 (6.2-10.0)   | 3.5 (3.0-4.2)      | 3.7 (3.2-4.4)  | 4.4 (4.0-4.7)       | 4.1 (3.8-4.5)    |
| Q5 (highest)                       | 25.0 (22.1-28.3)    | 5.8 (4.5-7.5)    | 2.6 (2.1-3.2)      | 3.6 (3.0-4.4)  | 3.4 (3.1-3.7)       | 4.2 (3.8-4.5)    |
| Unknown                            | 10.5 (1.5-74.5)     | 0.0 (0.0-40.0)   | 4.8 (3.6-6.5)      | 3.9 (2.8-5.4)  | 16.7 (15.2-18.3)    | 4.9 (4.1-5.8)    |
| In long-term care - second wave    | 22.3 (3.1-158.2)    | 22.3 (3.1-158.2) | 102.3 (73.8-141.8) | 0.0 (0.0-11.0) | 148.9 (134.1-165.2) | 19.4 (14.5-25.9) |
| In long-term care - third wave     | 0.0 (0.0-151.7)     | 0.0 (0.0-151.7)  | 5.3 (0.7-37.5)     | 0.0 (0.0-19.8) | 3.2 (1.2-8.5)       | 0.8 (0.1-5.7)    |
| <b>COVID-19 vaccination status</b> |                     |                  |                    |                |                     |                  |
| Unvaccinated                       | 81.9 (79.4-84.6)    | 6.4 (5.7-7.1)    | 3.9 (3.6-4.3)      | 3.6 (3.3-4.0)  | 7.1 (6.9-7.3)       | 5.3 (5.1-5.4)    |
| ≥14 days after first dose          | 27.3 (21.6-34.5)    | 1.2 (0.4-3.6)    | 2.5 (1.4-4.4)      | 1.7 (0.8-3.3)  | 3.9 (3.2-4.6)       | 4.1 (3.4-4.8)    |
| ≥7 days after second dose          | 7.0 (3.8-13.1)      | 1.4 (0.4-5.6)    | 1.2 (0.3-4.9)      | 0.6 (0.1-4.4)  | 1.2 (0.8-2.0)       | 0.9 (0.5-1.6)    |
| <b>Test positivity</b>             |                     |                  |                    |                |                     |                  |
| Total                              | 22.1 (21.4-22.8)    | 6.2 (5.6-7.0)    | 13.8 (12.7-15.1)   | 4.6 (4.2-5.0)  | 13.9 (13.6-14.3)    | 4.4 (4.2-4.5)    |
| <b>Age</b>                         |                     |                  |                    |                |                     |                  |
| <10                                | 26.6 (25.0-28.3)    | 5.2 (3.8-7.2)    | 11.3 (8.8-14.6)    | 1.4 (0.8-2.3)  | 16.9 (15.8-18.1)    | 4.9 (4.3-5.5)    |
| 10-17                              | 24.3 (22.5-26.3)    | 5.7 (3.7-8.8)    | 12.8 (10.0-16.3)   | 6.6 (4.8-9.1)  | 15.1 (14.0-16.3)    | 8.5 (7.7-9.5)    |
| 18-29                              | 23.3 (21.8-24.9)    | 7.8 (6.2-9.8)    | 15.4 (12.8-18.6)   | 5.8 (4.8-7.1)  | 13.3 (12.5-14.2)    | 6.5 (6.1-6.9)    |
| 30-49                              | 18.6 (17.4-20.0)    | 7.6 (6.2-9.3)    | 13.5 (11.4-15.9)   | 5.0 (4.3-5.9)  | 11.6 (11.0-12.3)    | 5.6 (5.3-5.9)    |
| 50-64                              | 19.3 (17.5-21.2)    | 6.3 (4.8-8.2)    | 13.8 (10.8-17.6)   | 5.2 (4.3-6.3)  | 13.2 (12.3-14.3)    | 4.0 (3.7-4.3)    |
| ≥65                                | 16.4 (13.9-19.4)    | 2.3 (1.3-3.9)    | 15.7 (12.9-19.2)   | 3.0 (2.3-3.8)  | 15.6 (14.6-16.8)    | 1.4 (1.2-1.5)    |



|                                 | Northern         |                 | Southern         |                | Rest of Manitoba |                |
|---------------------------------|------------------|-----------------|------------------|----------------|------------------|----------------|
|                                 | Contact/outbreak | Unknown         | Contact/outbreak | Unknown        | Contact/outbreak | Unknown        |
| Income quintile                 |                  |                 |                  |                |                  |                |
| Q1 (lowest)                     | 24.8 (23.8-25.9) | 5.4 (4.4-6.6)   | 16.1 (13.4-19.4) | 5.8 (4.7-7.2)  | 18.1 (17.3-18.9) | 5.4 (5.1-5.7)  |
| Q2                              | 19.9 (18.6-21.3) | 4.7 (3.7-5.9)   | 10.1 (7.8-13.0)  | 3.3 (2.5-4.3)  | 13.2 (12.4-14.2) | 4.9 (4.6-5.2)  |
| Q3                              | 19.0 (16.1-22.3) | 5.7 (3.4-9.6)   | 19.5 (16.3-23.3) | 4.6 (3.8-5.8)  | 11.9 (11.1-12.9) | 3.6 (3.3-3.9)  |
| Q4                              | 21.5 (19.4-23.7) | 8.9 (7.0-11.3)  | 14.6 (12.3-17.4) | 5.4 (4.5-6.4)  | 11.7 (10.8-12.7) | 3.8 (3.5-4.1)  |
| Q5 (highest)                    | 15.9 (14.1-18.0) | 9.4 (7.3-12.1)  | 10.3 (8.2-12.9)  | 3.8 (3.1-4.6)  | 9.2 (8.4-10.1)   | 4.0 (3.7-4.4)  |
| Unknown                         | 2.2 (0.3-15.4)   | 0.0 (0.0-26.3)  | 11.1 (8.2-14.9)  | 4.6 (3.3-6.4)  | 15.9 (14.5-17.5) | 3.8 (3.2-4.5)  |
| In long-term care - second wave | 1.1 (0.2-7.9)    | 5.0 (0.7-35.5)  | 12.5 (9.0-17.4)  | 0.0 (0.0-41.0) | 19.2 (17.3-21.3) | 8.5 (6.4-11.4) |
| In long-term care - third wave  | 0.0 (0.0-368.9)  | 0.0 (0.0-184.4) | 2.3 (0.3-16.5)   | 0.0 (0.0-30.7) | 1.7 (0.6-4.4)    | 0.4 (0.0-2.5)  |
| COVID-19 vaccination status     |                  |                 |                  |                |                  |                |
| Unvaccinated                    | 23.5 (22.7-24.2) | 7.0 (6.2-7.8)   | 14.4 (13.2-15.7) | 5.1 (4.6-5.5)  | 14.6 (14.2-15.1) | 4.7 (4.6-4.9)  |
| ≥14 days after first dose       | 7.7 (6.1-9.8)    | 0.8 (0.3-2.5)   | 8.6 (4.9-15.1)   | 0.9 (0.5-1.8)  | 6.8 (5.7-8.1)    | 2.1 (1.8-2.5)  |
| ≥7 days after second dose       | 2.4 (1.3-4.4)    | 0.9 (0.2-3.8)   | 1.8 (0.4-7.1)    | 0.3 (0.0-2.0)  | 2.0 (1.2-3.2)    | 0.4 (0.2-0.8)  |

<sup>a</sup> The second wave is from October 1, 2020 to Feb 28, 2021. <sup>b</sup> The third wave is from March 1, 2021 to June 1, 2021.

**Supplementary Table 7 Testing and incidence rates (per 1,000 person-years) and test positivity rate (95% confidence interval) according to certain socio-economic and clinical characteristics during the second wave<sup>a</sup> by region and reason for testing**

|                                    | Northern         |                   | Southern          |                  | Rest of Manitoba    |                    |
|------------------------------------|------------------|-------------------|-------------------|------------------|---------------------|--------------------|
|                                    | Screening        | Symptomatic       | Screening         | Symptomatic      | Screening           | Symptomatic        |
| <b>Testing rates</b>               |                  |                   |                   |                  |                     |                    |
| Total                              | 248 (242-253)    | 306 (300-312)     | 95 (93-97)        | 241 (238-244)    | 133 (132-134)       | 238 (237-240)      |
| <b>Age</b>                         |                  |                   |                   |                  |                     |                    |
| <10                                | 115 (107-124)    | 178 (168-188)     | 42 (39-46)        | 183 (176-190)    | 86 (83-88)          | 252 (248-256)      |
| 10-17                              | 157 (145-169)    | 222 (209-237)     | 61 (56-66)        | 195 (186-203)    | 106 (103-109)       | 220 (216-225)      |
| 18-29                              | 315 (301-330)    | 377 (362-393)     | 109 (104-115)     | 291 (282-300)    | 165 (162-168)       | 289 (285-293)      |
| 30-49                              | 330 (318-344)    | 377 (363-391)     | 115 (110-119)     | 286 (279-293)    | 162 (159-164)       | 287 (284-290)      |
| 50-64                              | 309 (293-325)    | 338 (322-355)     | 97 (93-103)       | 222 (215-230)    | 123 (120-125)       | 205 (202-208)      |
| ≥65                                | 255 (236-276)    | 354 (331-378)     | 137 (131-144)     | 245 (236-254)    | 120 (118-123)       | 156 (154-159)      |
| <b>Income quintile</b>             |                  |                   |                   |                  |                     |                    |
| Q1 (lowest)                        | 326 (314-338)    | 302 (290-313)     | 97 (92-102)       | 222 (214-230)    | 156 (153-159)       | 236 (233-240)      |
| Q2                                 | 237 (227-247)    | 262 (252-272)     | 107 (102-113)     | 235 (227-244)    | 131 (129-133)       | 237 (234-241)      |
| Q3                                 | 307 (283-332)    | 360 (334-388)     | 97 (93-103)       | 249 (242-258)    | 127 (125-130)       | 232 (229-235)      |
| Q4                                 | 213 (201-226)    | 313 (298-328)     | 89 (85-93)        | 223 (217-230)    | 123 (120-125)       | 245 (241-248)      |
| Q5 (highest)                       | 169 (159-179)    | 351 (337-366)     | 91 (87-96)        | 269 (261-276)    | 111 (109-113)       | 239 (235-242)      |
| Unknown                            | 304 (191-482)    | 455 (312-664)     | 90 (83-98)        | 259 (246-273)    | 223 (216-231)       | 260 (252-268)      |
| In long-term care                  | 802 (579-1,112)  | 423 (270-664)     | 608 (532-695)     | 446 (382-522)    | 994 (955-1,035)     | 434 (409-462)      |
| <b>COVID-19 vaccination status</b> |                  |                   |                   |                  |                     |                    |
| Unvaccinated                       | 242 (237-248)    | 306 (300-312)     | 95 (93-97)        | 241 (238-244)    | 132 (131-133)       | 239 (238-240)      |
| ≥14 days after first dose          | 946 (829-1,079)  | 315 (251-396)     | 182 (127-262)     | 245 (179-336)    | 383 (350-420)       | 188 (166-214)      |
| ≥7 days after second dose          | 231 (87-615)     | 115 (29-461)      | 31 (12-84)        | 110 (65-185)     | 94 (78-114)         | 83 (68-101)        |
| <b>Incidence rates</b>             |                  |                   |                   |                  |                     |                    |
| Total                              | 19.7 (18.2-21.3) | 44.8 (42.6-47.2)  | 6.9 (6.3-7.4)     | 31.1 (29.9-32.3) | 8.7 (8.5-9.0)       | 21.3 (20.9-21.7)   |
| <b>Age</b>                         |                  |                   |                   |                  |                     |                    |
| <10                                | 14.0 (11.4-17.3) | 26.9 (23.2-31.3)  | 4.6 (3.6-5.8)     | 7.1 (5.8-8.7)    | 8.4 (7.7-9.2)       | 8.9 (8.1-9.7)      |
| 10-17                              | 16.9 (13.5-21.2) | 33.8 (28.8-39.7)  | 6.3 (4.9-8.0)     | 19.6 (17.1-22.5) | 9.4 (8.5-10.4)      | 18.8 (17.6-20.2)   |
| 18-29                              | 25.7 (21.9-30.2) | 60.5 (54.5-67.2)  | 8.2 (6.8-9.8)     | 38.9 (35.8-42.3) | 9.8 (9.1-10.6)      | 27.2 (26.0-28.5)   |
| 30-49                              | 23.5 (20.2-27.2) | 48.8 (44.0-54.0)  | 7.3 (6.2-8.5)     | 35.1 (32.7-37.7) | 8.6 (8.1-9.2)       | 24.7 (23.8-25.6)   |
| 50-64                              | 19.6 (15.9-24.0) | 49.6 (43.6-56.5)  | 7.0 (5.8-8.5)     | 36.9 (34.0-40.1) | 7.2 (6.7-7.8)       | 21.8 (20.8-22.8)   |
| ≥65                                | 16.4 (12.0-22.4) | 52.5 (44.0-62.5)  | 7.9 (6.4-9.7)     | 47.8 (44.0-51.9) | 9.8 (9.1-10.5)      | 20.1 (19.1-21.1)   |
| <b>Income quintile</b>             |                  |                   |                   |                  |                     |                    |
| Q1 (lowest)                        | 28.6 (25.2-32.4) | 57.2 (52.3-62.5)  | 6.8 (5.5-8.3)     | 33.5 (30.5-36.6) | 12.4 (11.7-13.2)    | 31.7 (30.6-32.9)   |
| Q2                                 | 21.1 (18.4-24.3) | 33.3 (29.8-37.2)  | 5.9 (4.7-7.4)     | 29.1 (26.4-32.2) | 8.8 (8.2-9.4)       | 21.8 (20.8-22.8)   |
| Q3                                 | 25.2 (19.1-33.4) | 52.0 (42.8-63.2)  | 8.1 (6.7-9.7)     | 36.1 (33.1-39.3) | 6.7 (6.2-7.2)       | 17.0 (16.2-17.8)   |
| Q4                                 | 13.5 (10.7-17.1) | 46.1 (40.6-52.4)  | 7.6 (6.6-8.9)     | 34.0 (31.6-36.5) | 7.4 (6.8-8.0)       | 18.3 (17.5-19.3)   |
| Q5 (highest)                       | 9.0 (7.0-11.7)   | 41.9 (37.2-47.2)  | 5.5 (4.6-6.7)     | 25.1 (22.9-27.5) | 5.3 (4.8-5.8)       | 16.0 (15.1-16.8)   |
| Unknown                            | 16.9 (2.4-119.7) | 67.5 (25.3-179.8) | 7.3 (5.3-9.9)     | 24.8 (20.9-29.3) | 26.0 (23.6-28.6)    | 31.8 (29.1-34.7)   |
| In long-term care                  | 0.0 (0.0-84.6)   | 22.3 (3.1-158.2)  | 96.6 (69.0-135.2) | 42.6 (25.7-70.7) | 151.8 (136.9-168.3) | 103.7 (91.6-117.5) |
| <b>COVID-19 vaccination status</b> |                  |                   |                   |                  |                     |                    |
| Unvaccinated                       | 19.8 (18.3-21.4) | 45.1 (42.8-47.5)  | 6.9 (6.4-7.5)     | 31.2 (30.0-32.4) | 8.8 (8.5-9.0)       | 21.4 (21.0-21.8)   |
| ≥14 days after first dose          | 0.0 (0.0-17.1)   | 12.8 (4.1-39.6)   | 0.0 (0.0-26.9)    | 0.0 (0.0-26.9)   | 5.8 (2.7-12.1)      | 1.6 (0.4-6.6)      |
| ≥7 days after second dose          | 0.0 (0.0-354.3)  | 0.0 (0.0-354.3)   | 0.0 (0.0-32.0)    | 0.0 (0.0-32.0)   | 0.0 (0.0-3.6)       | 0.9 (0.1-6.2)      |
| <b>Test positivity</b>             |                  |                   |                   |                  |                     |                    |
| Total                              | 7.9 (7.3-8.6)    | 14.7 (13.9-15.5)  | 7.2 (6.7-7.8)     | 12.9 (12.4-13.4) | 6.6 (6.4-6.8)       | 8.9 (8.8-9.1)      |
| <b>Age</b>                         |                  |                   |                   |                  |                     |                    |
| <10                                | 12.2 (9.9-15.0)  | 15.2 (13.0-17.6)  | 10.9 (8.5-13.9)   | 3.9 (3.2-4.7)    | 9.8 (8.9-10.7)      | 3.5 (3.2-3.9)      |
| 10-17                              | 10.8 (8.6-13.6)  | 15.2 (13.0-17.9)  | 10.4 (8.1-13.2)   | 10.1 (8.8-11.6)  | 8.8 (8.0-9.8)       | 8.5 (8.0-9.2)      |
| 18-29                              | 8.2 (6.9-9.6)    | 16.0 (14.5-17.8)  | 7.5 (6.2-9.0)     | 13.4 (12.3-14.5) | 5.9 (5.5-6.4)       | 9.4 (9.0-9.9)      |
| 30-49                              | 7.1 (6.1-8.2)    | 13.0 (11.7-14.3)  | 6.4 (5.4-7.4)     | 12.3 (11.5-13.2) | 5.3 (5.0-5.7)       | 8.6 (8.3-8.9)      |
| 50-64                              | 6.3 (5.2-7.8)    | 14.7 (12.9-16.7)  | 7.2 (5.9-8.7)     | 16.6 (15.3-18.1) | 5.9 (5.5-6.4)       | 10.6 (10.2-11.1)   |
| ≥65                                | 6.4 (4.7-8.8)    | 14.8 (12.4-17.7)  | 5.8 (4.7-7.1)     | 19.5 (17.9-21.2) | 8.1 (7.6-8.7)       | 12.9 (12.2-13.5)   |
| <b>Income quintile</b>             |                  |                   |                   |                  |                     |                    |
| Q1 (lowest)                        | 8.8 (7.7-9.9)    | 19.0 (17.3-20.7)  | 7.0 (5.7-8.6)     | 15.1 (13.7-16.5) | 8.0 (7.5-8.5)       | 13.4 (12.9-13.9)   |
| Q2                                 | 8.9 (7.8-10.3)   | 12.7 (11.4-14.2)  | 5.5 (4.4-6.9)     | 12.4 (11.2-13.7) | 6.7 (6.3-7.2)       | 9.2 (8.8-9.6)      |

|                             | Northern       |                  | Southern         |                  | Rest of Manitoba |                  |
|-----------------------------|----------------|------------------|------------------|------------------|------------------|------------------|
|                             | Screening      | Symptomatic      | Screening        | Symptomatic      | Screening        | Symptomatic      |
| Q3                          | 8.2 (6.2-10.9) | 14.4 (11.9-17.6) | 8.3 (6.9-9.9)    | 14.5 (13.3-15.7) | 5.2 (4.8-5.7)    | 7.3 (7.0-7.7)    |
| Q4                          | 6.3 (5.0-8.0)  | 14.7 (13.0-16.7) | 8.6 (7.4-10.0)   | 15.2 (14.2-16.3) | 6.0 (5.6-6.5)    | 7.5 (7.1-7.9)    |
| Q5 (highest)                | 5.3 (4.1-6.9)  | 11.9 (10.6-13.4) | 6.1 (5.0-7.4)    | 9.4 (8.5-10.2)   | 4.8 (4.4-5.2)    | 6.7 (6.3-7.0)    |
| Unknown                     | 5.6 (0.8-39.4) | 14.8 (5.6-39.5)  | 8.1 (5.9-11.0)   | 9.6 (8.1-11.3)   | 11.6 (10.6-12.8) | 12.2 (11.2-13.3) |
| In long-term care           | 0.0 (0.0-10.5) | 5.3 (0.7-37.4)   | 15.9 (11.4-22.2) | 9.6 (5.8-15.8)   | 15.3 (13.8-16.9) | 23.9 (21.1-27.1) |
| COVID-19 vaccination status |                |                  |                  |                  |                  |                  |
| Unvaccinated                | 8.2 (7.6-8.9)  | 14.8 (14.0-15.5) | 7.3 (6.7-7.9)    | 12.9 (12.5-13.4) | 6.6 (6.4-6.8)    | 9.0 (8.8-9.1)    |
| ≥14 days after first dose   | 0.0 (0.0-1.6)  | 4.1 (1.3-12.6)   | 0.0 (0.0-13.7)   | 0.0 (0.0-10.0)   | 1.5 (0.7-3.2)    | 0.9 (0.2-3.5)    |
| ≥7 days after second dose   | 0.0 (0.0-61.5) | 0.0 (0.0-368.9)  | 0.0 (0.0-92.2)   | 0.0 (0.0-24.6)   | 0.0 (0.0-3.4)    | 1.1 (0.1-7.6)    |

<sup>a</sup> The second wave is from October 1, 2020 to Feb 28, 2021.

**Supplementary Table 8 Testing and incidence rates (per 1,000 person-years) and test positivity rate (95% confidence interval) according to certain socio-economic and clinical characteristics during the second wave<sup>a</sup> by region and reason for testing**

|                                    | Northern            |                  | Southern           |                | Rest of Manitoba    |                  |
|------------------------------------|---------------------|------------------|--------------------|----------------|---------------------|------------------|
|                                    | Contact/outbreak    | Unknown          | Contact/outbreak   | Unknown        | Contact/outbreak    | Unknown          |
| <b>Testing rates</b>               |                     |                  |                    |                |                     |                  |
| Total                              | 323 (317-329)       | 80 (77-84)       | 30 (29-31)         | 63 (61-65)     | 46 (45-46)          | 103 (102-104)    |
| <b>Age</b>                         |                     |                  |                    |                |                     |                  |
| <10                                | 305 (292-319)       | 45 (40-51)       | 19 (17-22)         | 32 (29-35)     | 39 (37-41)          | 51 (49-53)       |
| 10-17                              | 290 (275-306)       | 38 (33-44)       | 31 (28-34)         | 29 (26-33)     | 48 (46-50)          | 52 (50-54)       |
| 18-29                              | 383 (368-400)       | 87 (80-95)       | 34 (31-37)         | 70 (65-74)     | 55 (53-57)          | 105 (103-108)    |
| 30-49                              | 343 (330-356)       | 97 (91-105)      | 33 (30-35)         | 79 (75-83)     | 46 (45-48)          | 106 (104-108)    |
| 50-64                              | 306 (290-322)       | 103 (94-113)     | 23 (20-25)         | 75 (71-79)     | 37 (36-38)          | 104 (102-106)    |
| ≥65                                | 267 (247-288)       | 138 (124-154)    | 44 (40-48)         | 80 (75-85)     | 50 (48-51)          | 162 (159-165)    |
| <b>Income quintile</b>             |                     |                  |                    |                |                     |                  |
| Q1 (lowest)                        | 563 (547-579)       | 103 (96-110)     | 34 (31-37)         | 53 (50-57)     | 73 (71-74)          | 127 (125-130)    |
| Q2                                 | 254 (244-265)       | 83 (78-90)       | 26 (24-29)         | 56 (52-60)     | 40 (38-41)          | 103 (101-105)    |
| Q3                                 | 268 (246-292)       | 69 (59-82)       | 32 (30-35)         | 61 (57-65)     | 33 (32-34)          | 96 (94-98)       |
| Q4                                 | 256 (243-271)       | 71 (64-78)       | 27 (25-29)         | 58 (55-61)     | 34 (33-36)          | 96 (94-98)       |
| Q5 (highest)                       | 171 (161-181)       | 56 (50-62)       | 26 (23-28)         | 81 (77-86)     | 33 (32-35)          | 92 (90-94)       |
| Unknown                            | 725 (538-978)       | 186 (103-335)    | 48 (43-54)         | 69 (63-77)     | 129 (124-135)       | 115 (110-121)    |
| In long-term care                  | 2,005 (1,631-2,465) | 446 (287-691)    | 815 (726-916)      | 28 (15-53)     | 776 (741-812)       | 227 (209-247)    |
| <b>COVID-19 vaccination status</b> |                     |                  |                    |                |                     |                  |
| Unvaccinated                       | 321 (315-327)       | 79 (76-83)       | 30 (29-31)         | 62 (61-64)     | 45 (44-46)          | 103 (102-104)    |
| ≥14 days after first dose          | 597 (506-704)       | 205 (154-271)    | 176 (122-255)      | 327 (249-429)  | 302 (273-334)       | 211 (186-238)    |
| ≥7 days after second dose          | 346 (156-771)       | 115 (29-461)     | 8 (1-56)           | 267 (191-373)  | 18 (12-28)          | 164 (142-190)    |
| <b>Incidence rates</b>             |                     |                  |                    |                |                     |                  |
| Total                              | 81.7 (78.6-84.9)    | 7.2 (6.4-8.2)    | 4.7 (4.2-5.2)      | 4.1 (3.7-4.5)  | 7.2 (7.0-7.5)       | 4.4 (4.2-4.6)    |
| <b>Age</b>                         |                     |                  |                    |                |                     |                  |
| <10                                | 93.3 (86.1-101.1)   | 3.3 (2.2-5.1)    | 2.6 (1.9-3.6)      | 0.7 (0.4-1.3)  | 8.1 (7.4-8.9)       | 2.0 (1.6-2.4)    |
| 10-17                              | 89.8 (81.4-99.1)    | 3.6 (2.2-5.9)    | 4.4 (3.3-5.8)      | 2.1 (1.4-3.2)  | 9.2 (8.3-10.1)      | 4.1 (3.6-4.8)    |
| 18-29                              | 101.9 (94.0-110.5)  | 10.0 (7.7-12.9)  | 6.0 (4.8-7.4)      | 5.6 (4.5-6.9)  | 7.6 (7.0-8.3)       | 5.9 (5.4-6.5)    |
| 30-49                              | 71.8 (66.0-78.2)    | 10.7 (8.6-13.3)  | 4.6 (3.8-5.6)      | 5.5 (4.6-6.6)  | 6.3 (5.8-6.7)       | 5.6 (5.2-6.0)    |
| 50-64                              | 66.8 (59.8-74.7)    | 8.8 (6.5-12.0)   | 3.5 (2.7-4.6)      | 5.4 (4.3-6.7)  | 5.4 (4.9-5.9)       | 4.6 (4.1-5.0)    |
| ≥65                                | 47.0 (39.1-56.6)    | 4.2 (2.3-7.8)    | 7.7 (6.3-9.5)      | 3.8 (2.8-5.1)  | 8.9 (8.3-9.6)       | 2.9 (2.5-3.3)    |
| <b>Income quintile</b>             |                     |                  |                    |                |                     |                  |
| Q1 (lowest)                        | 158.8 (150.6-167.5) | 7.7 (6.1-9.8)    | 6.4 (5.2-7.8)      | 4.6 (3.6-5.8)  | 15.5 (14.6-16.3)    | 6.7 (6.2-7.3)    |
| Q2                                 | 60.4 (55.6-65.5)    | 6.0 (4.7-7.8)    | 2.7 (1.9-3.7)      | 2.5 (1.8-3.5)  | 5.9 (5.4-6.4)       | 4.8 (4.4-5.3)    |
| Q3                                 | 58.7 (48.8-70.5)    | 5.7 (3.1-10.2)   | 7.2 (5.9-8.7)      | 4.3 (3.4-5.5)  | 4.1 (3.7-4.5)       | 3.3 (2.9-3.7)    |
| Q4                                 | 64.5 (57.9-71.7)    | 9.1 (6.8-12.1)   | 4.4 (3.6-5.4)      | 4.3 (3.5-5.3)  | 4.4 (4.0-4.9)       | 3.7 (3.3-4.2)    |
| Q5 (highest)                       | 32.0 (27.9-36.7)    | 7.5 (5.6-9.9)    | 2.9 (2.2-3.8)      | 4.2 (3.4-5.3)  | 3.5 (3.1-3.9)       | 3.7 (3.3-4.1)    |
| Unknown                            | 0.0 (0.0-64.0)      | 0.0 (0.0-64.0)   | 5.5 (3.8-7.8)      | 4.6 (3.1-6.7)  | 23.3 (21.1-25.8)    | 3.9 (3.1-5.0)    |
| In long-term care                  | 22.3 (3.1-158.2)    | 22.3 (3.1-158.2) | 102.3 (73.8-141.8) | 0.0 (0.0-11.0) | 148.9 (134.1-165.2) | 19.4 (14.5-25.9) |
| <b>COVID-19 vaccination status</b> |                     |                  |                    |                |                     |                  |
| Unvaccinated                       | 82.1 (78.9-85.3)    | 7.3 (6.4-8.3)    | 4.6 (4.2-5.1)      | 4.1 (3.7-4.5)  | 7.2 (7.0-7.5)       | 4.4 (4.2-4.6)    |
| ≥14 days after first dose          | 42.6 (22.9-79.2)    | 0.0 (0.0-17.1)   | 25.2 (9.4-67.0)    | 0.0 (0.0-26.9) | 20.6 (13.9-30.4)    | 0.8 (0.1-5.8)    |
| ≥7 days after second dose          | 0.0 (0.0-354.3)     | 0.0 (0.0-354.3)  | 0.0 (0.0-32.0)     | 0.0 (0.0-32.0) | 0.0 (0.0-3.6)       | 0.9 (0.1-6.2)    |
| <b>Test positivity</b>             |                     |                  |                    |                |                     |                  |
| Total                              | 25.3 (24.3-26.3)    | 9.0 (7.9-10.3)   | 15.6 (14.2-17.2)   | 6.5 (5.8-7.2)  | 15.9 (15.3-16.4)    | 4.3 (4.1-4.5)    |
| <b>Age</b>                         |                     |                  |                    |                |                     |                  |
| <10                                | 30.6 (28.2-33.2)    | 7.3 (4.8-11.2)   | 13.7 (9.9-19.0)    | 2.3 (1.2-4.2)  | 20.8 (18.9-22.9)    | 3.9 (3.2-4.7)    |
| 10-17                              | 30.9 (28.1-34.1)    | 9.5 (5.8-15.5)   | 14.2 (10.6-19.0)   | 7.3 (4.8-11.1) | 19.1 (17.3-21.2)    | 8.0 (6.9-9.3)    |
| 18-29                              | 26.6 (24.5-28.8)    | 11.5 (8.9-14.9)  | 17.6 (14.2-21.7)   | 8.0 (6.4-10.0) | 13.9 (12.8-15.1)    | 5.6 (5.1-6.2)    |
| 30-49                              | 21.0 (19.3-22.8)    | 10.9 (8.8-13.6)  | 14.2 (11.7-17.3)   | 7.0 (5.9-8.4)  | 13.5 (12.6-14.5)    | 5.3 (4.9-5.7)    |
| 50-64                              | 21.9 (19.6-24.4)    | 8.5 (6.3-11.6)   | 15.4 (11.8-20.2)   | 7.2 (5.8-8.9)  | 14.6 (13.3-16.0)    | 4.4 (4.0-4.9)    |
| ≥65                                | 17.6 (14.6-21.2)    | 3.0 (1.6-5.6)    | 17.7 (14.4-21.8)   | 4.7 (3.5-6.4)  | 17.9 (16.6-19.3)    | 1.8 (1.6-2.0)    |
| <b>Income quintile</b>             |                     |                  |                    |                |                     |                  |
| Q1 (lowest)                        | 28.2 (26.8-29.8)    | 7.5 (5.9-9.5)    | 18.6 (15.1-22.9)   | 8.5 (6.7-10.9) | 21.3 (20.2-22.5)    | 5.3 (4.8-5.7)    |
| Q2                                 | 23.7 (21.9-25.8)    | 7.2 (5.6-9.4)    | 10.1 (7.3-14.1)    | 4.5 (3.2-6.3)  | 15.0 (13.7-16.3)    | 4.7 (4.3-5.2)    |

|                             | Northern         |                  | Southern         |                | Rest of Manitoba |                |
|-----------------------------|------------------|------------------|------------------|----------------|------------------|----------------|
|                             | Contact/outbreak | Unknown          | Contact/outbreak | Unknown        | Contact/outbreak | Unknown        |
| Q3                          | 21.9 (18.2-26.3) | 8.1 (4.5-14.7)   | 22.2 (18.4-26.9) | 7.1 (5.6-9.1)  | 12.4 (11.2-13.7) | 3.4 (3.1-3.8)  |
| Q4                          | 25.1 (22.6-28.0) | 12.8 (9.6-17.0)  | 16.3 (13.4-19.9) | 7.4 (6.1-9.1)  | 12.8 (11.5-14.1) | 3.9 (3.5-4.3)  |
| Q5 (highest)                | 18.7 (16.3-21.5) | 13.3 (10.0-17.7) | 11.3 (8.7-14.8)  | 5.2 (4.2-6.5)  | 10.4 (9.3-11.7)  | 4.0 (3.6-4.5)  |
| Unknown                     | 0.0 (0.0-8.6)    | 0.0 (0.0-36.9)   | 11.4 (7.9-16.3)  | 6.6 (4.4-9.7)  | 18.0 (16.3-19.9) | 3.4 (2.7-4.4)  |
| In long-term care           | 1.1 (0.2-7.9)    | 5.0 (0.7-35.5)   | 12.5 (9.0-17.4)  | 0.0 (0.0-41.0) | 19.2 (17.3-21.3) | 8.5 (6.4-11.4) |
| COVID-19 vaccination status |                  |                  |                  |                |                  |                |
| Unvaccinated                | 25.6 (24.6-26.6) | 9.2 (8.1-10.5)   | 15.6 (14.2-17.2) | 6.6 (5.9-7.3)  | 16.0 (15.5-16.6) | 4.3 (4.1-4.5)  |
| ≥14 days after first dose   | 7.1 (3.8-13.3)   | 0.0 (0.0-8.8)    | 14.3 (5.4-38.1)  | 0.0 (0.0-7.8)  | 6.8 (4.6-10.1)   | 0.4 (0.1-2.8)  |
| ≥7 days after second dose   | 0.0 (0.0-61.5)   | 0.0 (0.0-184.4)  | 0.0 (0.0-368.9)  | 0.0 (0.0-10.5) | 0.0 (0.0-9.0)    | 0.5 (0.1-3.8)  |

<sup>a</sup> The second wave is from October 1, 2020 to Feb 28, 2021.

**Supplementary Table 9 Testing and incidence rates (per 1,000 person-years) and test positivity rate (95% confidence interval) according to certain socio-economic and clinical characteristics during the third wave<sup>a</sup> by region and reason for testing**

|                                    | Northern         |                  | Southern       |                  | Rest of Manitoba |                  |
|------------------------------------|------------------|------------------|----------------|------------------|------------------|------------------|
|                                    | Screening        | Symptomatic      | Screening      | Symptomatic      | Screening        | Symptomatic      |
| <b>Testing rates</b>               |                  |                  |                |                  |                  |                  |
| Total                              | 243 (236-250)    | 332 (324-340)    | 97 (95-100)    | 239 (235-243)    | 171 (170-173)    | 249 (247-250)    |
| <b>Age</b>                         |                  |                  |                |                  |                  |                  |
| <10                                | 130 (119-142)    | 269 (253-286)    | 84 (78-90)     | 319 (308-332)    | 186 (181-190)    | 391 (384-398)    |
| 10-17                              | 186 (170-204)    | 353 (331-377)    | 90 (83-98)     | 231 (219-243)    | 181 (175-186)    | 247 (240-253)    |
| 18-29                              | 281 (264-300)    | 376 (356-398)    | 112 (105-119)  | 242 (232-253)    | 217 (212-221)    | 293 (288-298)    |
| 30-49                              | 332 (315-349)    | 372 (354-390)    | 114 (109-120)  | 266 (258-275)    | 207 (204-210)    | 293 (290-297)    |
| 50-64                              | 302 (282-323)    | 314 (294-336)    | 83 (77-89)     | 179 (170-187)    | 136 (132-139)    | 177 (174-181)    |
| ≥65                                | 207 (185-232)    | 266 (241-294)    | 97 (90-105)    | 179 (170-189)    | 101 (98-104)     | 117 (114-120)    |
| <b>Income quintile</b>             |                  |                  |                |                  |                  |                  |
| Q1 (lowest)                        | 408 (390-427)    | 388 (371-406)    | 80 (74-86)     | 198 (189-208)    | 178 (175-182)    | 239 (234-243)    |
| Q2                                 | 290 (276-304)    | 326 (311-341)    | 109 (102-116)  | 252 (241-263)    | 177 (173-180)    | 251 (247-255)    |
| Q3                                 | 111 (93-132)     | 279 (251-311)    | 81 (75-87)     | 223 (213-233)    | 167 (164-170)    | 245 (241-249)    |
| Q4                                 | 123 (111-136)    | 267 (249-286)    | 92 (87-97)     | 230 (222-239)    | 172 (169-176)    | 251 (247-256)    |
| Q5 (highest)                       | 111 (101-123)    | 341 (323-360)    | 108 (102-115)  | 259 (250-269)    | 154 (151-158)    | 256 (251-260)    |
| Unknown                            | 83 (27-259)      | 278 (150-517)    | 140 (129-153)  | 315 (297-334)    | 205 (197-214)    | 258 (248-268)    |
| In long-term care                  | 328 (164-655)    | 246 (110-547)    | 317 (246-408)  | 153 (106-221)    | 419 (384-456)    | 175 (153-200)    |
| <b>COVID-19 vaccination status</b> |                  |                  |                |                  |                  |                  |
| Unvaccinated                       | 223 (216-231)    | 321 (312-330)    | 92 (90-95)     | 239 (235-244)    | 170 (169-172)    | 260 (258-262)    |
| ≥14 days after first dose          | 306 (285-330)    | 411 (386-438)    | 125 (115-136)  | 236 (222-250)    | 162 (158-166)    | 188 (184-193)    |
| ≥7 days after second dose          | 350 (320-382)    | 323 (295-354)    | 166 (146-188)  | 229 (206-254)    | 212 (204-221)    | 184 (177-192)    |
| <b>Incidence rates</b>             |                  |                  |                |                  |                  |                  |
| Total                              | 11.4 (10.0-13.1) | 33.4 (30.9-36.1) | 5.0 (4.5-5.7)  | 21.6 (20.4-22.8) | 9.6 (9.2-10.0)   | 26.8 (26.2-27.4) |
| <b>Age</b>                         |                  |                  |                |                  |                  |                  |
| <10                                | 13.6 (10.3-17.9) | 28.3 (23.3-34.3) | 5.8 (4.4-7.6)  | 11.0 (9.0-13.5)  | 17.9 (16.5-19.4) | 21.6 (20.0-23.3) |
| 10-17                              | 17.1 (12.7-23.0) | 37.7 (30.9-46.1) | 7.0 (5.2-9.3)  | 22.6 (19.2-26.6) | 12.9 (11.6-14.4) | 31.3 (29.2-33.6) |
| 18-29                              | 12.2 (9.0-16.6)  | 41.5 (35.1-49.0) | 5.1 (3.8-6.8)  | 27.5 (24.3-31.3) | 12.6 (11.6-13.7) | 43.4 (41.5-45.3) |
| 30-49                              | 12.1 (9.2-15.8)  | 35.7 (30.6-41.8) | 5.6 (4.5-7.1)  | 27.0 (24.4-30.0) | 9.5 (8.8-10.2)   | 32.6 (31.3-33.9) |
| 50-64                              | 6.2 (3.9-10.0)   | 28.9 (23.2-36.0) | 4.4 (3.2-6.0)  | 20.4 (17.7-23.6) | 6.6 (6.0-7.4)    | 20.1 (18.9-21.4) |
| ≥65                                | 4.3 (1.9-9.5)    | 22.7 (16.1-32.1) | 2.4 (1.5-3.9)  | 19.0 (16.1-22.5) | 2.7 (2.3-3.2)    | 10.3 (9.4-11.2)  |
| <b>Income quintile</b>             |                  |                  |                |                  |                  |                  |
| Q1 (lowest)                        | 23.4 (19.4-28.1) | 51.8 (45.7-58.7) | 5.1 (3.8-6.9)  | 23.1 (20.0-26.5) | 12.4 (11.5-13.4) | 37.4 (35.7-39.1) |
| Q2                                 | 11.6 (9.1-14.8)  | 30.8 (26.6-35.8) | 7.3 (5.6-9.4)  | 26.7 (23.3-30.5) | 10.4 (9.5-11.3)  | 28.5 (27.1-30.0) |
| Q3                                 | 7.7 (4.0-14.9)   | 28.4 (20.2-39.9) | 3.1 (2.1-4.5)  | 17.9 (15.3-20.8) | 9.8 (9.0-10.6)   | 25.7 (24.4-27.1) |
| Q4                                 | 4.2 (2.4-7.2)    | 24.8 (19.9-31.0) | 5.9 (4.7-7.3)  | 24.4 (21.9-27.2) | 8.5 (7.7-9.3)    | 23.1 (21.8-24.4) |
| Q5 (highest)                       | 3.6 (2.1-6.1)    | 23.2 (18.9-28.6) | 3.6 (2.6-4.9)  | 17.1 (14.9-19.7) | 5.9 (5.3-6.6)    | 19.0 (17.8-20.2) |
| Unknown                            | 0.0 (0.0-105.5)  | 0.0 (0.0-105.5)  | 6.3 (4.2-9.6)  | 19.0 (14.9-24.2) | 14.5 (12.3-17.0) | 27.6 (24.6-31.0) |
| In long-term care                  | 0.0 (0.0-151.7)  | 0.0 (0.0-151.7)  | 5.3 (0.7-37.5) | 21.1 (7.9-56.3)  | 2.4 (0.8-7.4)    | 2.4 (0.8-7.4)    |
| <b>COVID-19 vaccination status</b> |                  |                  |                |                  |                  |                  |
| Unvaccinated                       | 13.4 (11.6-15.4) | 38.0 (35.0-41.3) | 5.3 (4.7-6.0)  | 22.8 (21.5-24.2) | 10.4 (10.0-10.8) | 29.5 (28.8-30.2) |
| ≥14 days after first dose          | 4.7 (2.6-8.5)    | 18.0 (13.3-24.4) | 3.7 (2.3-5.9)  | 14.2 (11.1-18.0) | 6.5 (5.7-7.5)    | 14.4 (13.2-15.8) |
| ≥7 days after second dose          | 2.1 (0.7-6.6)    | 10.0 (5.9-16.9)  | 0.0 (0.0-2.5)  | 4.0 (1.8-9.0)    | 2.2 (1.5-3.2)    | 5.6 (4.4-7.2)    |
| <b>Test positivity</b>             |                  |                  |                |                  |                  |                  |
| Total                              | 4.7 (4.1-5.4)    | 10.1 (9.3-10.9)  | 5.2 (4.6-5.8)  | 9.0 (8.5-9.6)    | 5.6 (5.4-5.8)    | 10.8 (10.5-11.0) |
| <b>Age</b>                         |                  |                  |                |                  |                  |                  |
| <10                                | 10.5 (7.9-13.8)  | 10.5 (8.7-12.7)  | 6.9 (5.2-9.1)  | 3.5 (2.8-4.2)    | 9.6 (8.9-10.5)   | 5.5 (5.1-6.0)    |
| 10-17                              | 9.2 (6.8-12.3)   | 10.7 (8.8-13.0)  | 7.7 (5.7-10.4) | 9.8 (8.3-11.5)   | 7.1 (6.4-8.0)    | 12.7 (11.9-13.6) |
| 18-29                              | 4.4 (3.2-5.9)    | 11.0 (9.3-13.0)  | 4.5 (3.4-6.1)  | 11.4 (10.0-12.9) | 5.8 (5.3-6.3)    | 14.8 (14.2-15.5) |
| 30-49                              | 3.6 (2.8-4.8)    | 9.6 (8.2-11.2)   | 4.9 (3.9-6.2)  | 10.2 (9.2-11.3)  | 4.6 (4.3-4.9)    | 11.1 (10.7-11.5) |
| 50-64                              | 2.1 (1.3-3.3)    | 9.2 (7.4-11.5)   | 5.3 (3.9-7.3)  | 11.4 (9.9-13.2)  | 4.9 (4.4-5.4)    | 11.3 (10.7-12.0) |
| ≥65                                | 2.1 (0.9-4.6)    | 8.5 (6.0-12.1)   | 2.5 (1.5-4.0)  | 10.6 (9.0-12.6)  | 2.7 (2.3-3.2)    | 8.8 (8.0-9.6)    |
| <b>Income quintile</b>             |                  |                  |                |                  |                  |                  |
| Q1 (lowest)                        | 5.7 (4.8-6.9)    | 13.3 (11.8-15.1) | 6.4 (4.7-8.6)  | 11.6 (10.1-13.4) | 6.9 (6.4-7.5)    | 15.7 (15.0-16.4) |
| Q2                                 | 4.0 (3.1-5.1)    | 9.5 (8.1-11.0)   | 6.7 (5.2-8.6)  | 10.6 (9.3-12.1)  | 5.9 (5.4-6.4)    | 11.4 (10.8-11.9) |

|                             | Northern        |                  | Southern       |                 | Rest of Manitoba |                  |
|-----------------------------|-----------------|------------------|----------------|-----------------|------------------|------------------|
|                             | Screening       | Symptomatic      | Screening      | Symptomatic     | Screening        | Symptomatic      |
| Q3                          | 7.0 (3.6-13.4)  | 10.2 (7.2-14.3)  | 3.8 (2.6-5.5)  | 8.0 (6.9-9.3)   | 5.8 (5.4-6.4)    | 10.5 (10.0-11.0) |
| Q4                          | 3.4 (2.0-5.9)   | 9.3 (7.4-11.6)   | 6.4 (5.1-7.9)  | 10.6 (9.5-11.8) | 4.9 (4.5-5.4)    | 9.2 (8.7-9.7)    |
| Q5 (highest)                | 3.2 (1.9-5.5)   | 6.8 (5.5-8.4)    | 3.3 (2.4-4.5)  | 6.6 (5.7-7.6)   | 3.8 (3.4-4.3)    | 7.4 (7.0-7.9)    |
| Unknown                     | 0.0 (0.0-123.0) | 0.0 (0.0-36.9)   | 4.5 (3.0-6.8)  | 6.0 (4.7-7.7)   | 7.0 (6.0-8.3)    | 10.7 (9.5-12.0)  |
| In long-term care           | 0.0 (0.0-46.1)  | 0.0 (0.0-61.5)   | 1.7 (0.2-11.8) | 13.8 (5.2-36.8) | 0.6 (0.2-1.8)    | 1.4 (0.4-4.2)    |
| COVID-19 vaccination status |                 |                  |                |                 |                  |                  |
| Unvaccinated                | 6.0 (5.2-6.9)   | 11.9 (10.9-12.9) | 5.8 (5.1-6.5)  | 9.5 (9.0-10.1)  | 6.1 (5.9-6.3)    | 11.3 (11.1-11.6) |
| ≥14 days after first dose   | 1.5 (0.9-2.8)   | 4.4 (3.2-5.9)    | 2.9 (1.8-4.7)  | 6.0 (4.7-7.7)   | 4.0 (3.5-4.6)    | 7.7 (7.0-8.4)    |
| ≥7 days after second dose   | 0.6 (0.2-1.9)   | 3.1 (1.8-5.2)    | 0.0 (0.0-1.5)  | 1.8 (0.8-3.9)   | 1.0 (0.7-1.5)    | 3.1 (2.4-3.9)    |

<sup>a</sup> The third wave is from March 1, 2021 to June 1, 2021.

**Supplementary Table 10 Adjusted<sup>a</sup> associations between certain socio-economic and clinical characteristics and COVID-19 testing and incidence during the second<sup>b</sup> and third<sup>c</sup> waves by region and reason for testing**

|                                 | Northern          |                   | Southern            |                  | Rest of Manitoba    |                  |
|---------------------------------|-------------------|-------------------|---------------------|------------------|---------------------|------------------|
|                                 | Contact/outbreak  | Unknown           | Contact/outbreak    | Unknown          | Contact/outbreak    | Unknown          |
| <b>Testing (rate ratio)</b>     |                   |                   |                     |                  |                     |                  |
| Age                             |                   |                   |                     |                  |                     |                  |
| <10                             | 0.97 (0.93-1.02)  | 0.96 (0.87-1.06)  | 0.85 (0.76-0.94)    | 0.65 (0.61-0.70) | 1.19 (1.15-1.23)    | 0.65 (0.63-0.67) |
| 10-17                           | 1.04 (0.99-1.09)  | 0.72 (0.64-0.82)  | 1.06 (0.95-1.18)    | 0.51 (0.47-0.56) | 1.43 (1.38-1.49)    | 0.68 (0.65-0.70) |
| 18-29                           | 1.11 (1.06-1.16)  | 1.18 (1.08-1.30)  | 1.10 (1.00-1.22)    | 1.07 (1.00-1.13) | 1.22 (1.19-1.26)    | 1.18 (1.15-1.20) |
| 30-49                           | Ref.              | Ref.              | Ref.                | Ref.             | Ref.                | Ref.             |
| 50-64                           | 0.80 (0.76-0.84)  | 0.77 (0.70-0.85)  | 0.59 (0.53-0.66)    | 0.76 (0.71-0.80) | 0.65 (0.63-0.68)    | 0.79 (0.77-0.80) |
| ≥65                             | 0.55 (0.51-0.60)  | 0.79 (0.70-0.88)  | 0.50 (0.43-0.57)    | 0.69 (0.64-0.73) | 0.41 (0.39-0.43)    | 0.93 (0.91-0.95) |
| Female                          | 1.11 (1.08-1.15)  | 1.06 (1.00-1.13)  | 1.05 (0.99-1.12)    | 1.29 (1.24-1.35) | 1.01 (0.99-1.03)    | 1.16 (1.15-1.18) |
| Income quintile                 |                   |                   |                     |                  |                     |                  |
| Q1 (lowest)                     | Ref.              | Ref.              | Ref.                | Ref.             | Ref.                | Ref.             |
| Q2                              | 0.42 (0.40-0.43)  | 0.83 (0.77-0.89)  | 0.81 (0.72-0.90)    | 1.07 (0.99-1.15) | 0.58 (0.56-0.60)    | 0.83 (0.81-0.84) |
| Q3                              | 0.38 (0.35-0.41)  | 0.67 (0.58-0.77)  | 0.80 (0.72-0.89)    | 1.14 (1.06-1.22) | 0.50 (0.48-0.52)    | 0.79 (0.78-0.81) |
| Q4                              | 0.34 (0.32-0.35)  | 0.75 (0.68-0.82)  | 0.76 (0.69-0.84)    | 1.07 (1.00-1.14) | 0.49 (0.48-0.51)    | 0.80 (0.78-0.81) |
| Q5 (highest)                    | 0.24 (0.23-0.26)  | 0.54 (0.49-0.59)  | 0.81 (0.73-0.90)    | 1.40 (1.32-1.50) | 0.49 (0.47-0.50)    | 0.79 (0.77-0.80) |
| Unknown                         | 0.34 (0.24-0.46)  | 0.77 (0.43-1.39)  | 1.11 (0.98-1.26)    | 1.33 (1.22-1.46) | 0.83 (0.79-0.87)    | 0.88 (0.84-0.91) |
| In long-term care-second wave   | 9.24 (7.18-11.91) | 2.59 (1.50-4.48)  | 39.65 (32.77-47.99) | 0.28 (0.14-0.54) | 18.68 (17.33-20.14) | 0.92 (0.84-1.01) |
| In long-term care-third wave    | 0.40 (0.05-2.95)  | 0.32 (0.09-1.12)  | 18.96 (12.77-28.15) | 0.37 (0.21-0.66) | 8.94 (7.70-10.38)   | 0.64 (0.56-0.73) |
| Any chronic disease             | 1.16 (1.10-1.21)  | 1.54 (1.42-1.68)  | 1.08 (0.97-1.19)    | 1.32 (1.25-1.39) | 1.22 (1.18-1.25)    | 1.40 (1.38-1.43) |
| Immunosuppressed                | 0.94 (0.86-1.02)  | 1.06 (0.93-1.20)  | 0.97 (0.82-1.15)    | 1.30 (1.21-1.40) | 1.03 (0.98-1.08)    | 1.33 (1.30-1.36) |
| Use of ARBs/ACEIs <sup>d</sup>  | 1.16 (1.10-1.23)  | 1.03 (0.94-1.13)  | 1.05 (0.92-1.19)    | 1.10 (1.04-1.17) | 1.07 (1.03-1.11)    | 0.99 (0.97-1.01) |
| Use of proton-pump inhibitors   | 1.16 (1.10-1.22)  | 2.02 (1.86-2.19)  | 1.28 (1.15-1.44)    | 1.79 (1.70-1.89) | 1.29 (1.24-1.33)    | 1.70 (1.67-1.73) |
| No. of physician visits in 2019 |                   |                   |                     |                  |                     |                  |
| 0                               | Ref.              | Ref.              | Ref.                | Ref.             | Ref.                | Ref.             |
| 1-3                             | 1.03 (1.00-1.07)  | 1.14 (1.05-1.25)  | 1.35 (1.22-1.49)    | 1.51 (1.39-1.63) | 1.31 (1.26-1.35)    | 1.48 (1.43-1.52) |
| 4-8                             | 1.02 (0.97-1.07)  | 1.43 (1.29-1.58)  | 1.37 (1.23-1.52)    | 2.00 (1.85-2.17) | 1.34 (1.30-1.39)    | 1.81 (1.76-1.86) |
| ≥9                              | 1.05 (0.99-1.12)  | 1.88 (1.68-2.12)  | 1.40 (1.24-1.57)    | 2.79 (2.57-3.02) | 1.40 (1.35-1.45)    | 2.46 (2.39-2.53) |
| No. of hospitalizations in 2019 |                   |                   |                     |                  |                     |                  |
| 0                               | Ref.              | Ref.              | Ref.                | Ref.             | Ref.                | Ref.             |
| 1                               | 1.05 (0.98-1.11)  | 1.47 (1.33-1.62)  | 0.83 (0.72-0.97)    | 1.15 (1.06-1.23) | 1.05 (1.01-1.10)    | 1.55 (1.51-1.59) |
| ≥2                              | 0.99 (0.88-1.10)  | 2.38 (2.09-2.70)  | 0.93 (0.74-1.18)    | 1.76 (1.57-1.97) | 1.13 (1.04-1.22)    | 2.59 (2.51-2.68) |
| <b>Incidence (hazard ratio)</b> |                   |                   |                     |                  |                     |                  |
| Age                             |                   |                   |                     |                  |                     |                  |
| <10                             | 1.80 (1.59-2.03)  | 0.65 (0.42-1.01)  | 0.73 (0.52-1.01)    | 0.16 (0.09-0.28) | 1.89 (1.72-2.08)    | 0.49 (0.43-0.57) |
| 10-17                           | 1.67 (1.45-1.92)  | 0.59 (0.34-1.04)  | 1.13 (0.81-1.58)    | 0.66 (0.45-0.97) | 2.20 (1.98-2.44)    | 0.91 (0.80-1.03) |
| 18-29                           | 1.49 (1.32-1.68)  | 1.13 (0.80-1.60)  | 1.27 (0.96-1.66)    | 1.13 (0.87-1.48) | 1.38 (1.25-1.51)    | 1.24 (1.13-1.35) |
| 30-49                           | Ref.              | Ref.              | Ref.                | Ref.             | Ref.                | Ref.             |
| 50-64                           | 0.79 (0.69-0.91)  | 0.69 (0.48-1.00)  | 0.62 (0.45-0.85)    | 1.02 (0.79-1.33) | 0.71 (0.64-0.79)    | 0.71 (0.64-0.79) |
| ≥65                             | 0.50 (0.41-0.61)  | 0.27 (0.14-0.50)  | 0.69 (0.49-0.99)    | 0.66 (0.47-0.93) | 0.48 (0.42-0.54)    | 0.31 (0.27-0.36) |
| Female                          | 1.01 (0.95-1.08)  | 1.02 (0.80-1.29)  | 0.94 (0.79-1.12)    | 1.23 (1.03-1.48) | 0.92 (0.87-0.98)    | 0.97 (0.90-1.03) |
| Income quintile                 |                   |                   |                     |                  |                     |                  |
| Q1 (lowest)                     | Ref.              | Ref.              | Ref.                | Ref.             | Ref.                | Ref.             |
| Q2                              | 0.35 (0.32-0.38)  | 0.77 (0.56-1.06)  | 0.51 (0.37-0.70)    | 0.58 (0.41-0.82) | 0.44 (0.40-0.47)    | 0.76 (0.70-0.84) |
| Q3                              | 0.31 (0.27-0.37)  | 0.73 (0.41-1.28)  | 0.98 (0.76-1.26)    | 0.86 (0.64-1.16) | 0.34 (0.31-0.37)    | 0.56 (0.50-0.62) |
| Q4                              | 0.33 (0.29-0.37)  | 1.26 (0.90-1.75)  | 0.70 (0.54-0.90)    | 0.92 (0.70-1.21) | 0.33 (0.30-0.37)    | 0.59 (0.53-0.65) |
| Q5 (highest)                    | 0.18 (0.16-0.20)  | 0.93 (0.66-1.30)  | 0.52 (0.39-0.70)    | 0.85 (0.64-1.13) | 0.26 (0.23-0.29)    | 0.59 (0.53-0.65) |
| Unknown                         | 0.10 (0.01-0.71)  | No cases          | 0.81 (0.56-1.17)    | 0.91 (0.60-1.38) | 0.66 (0.58-0.74)    | 0.50 (0.42-0.61) |
| In long-term care-second wave   | 0.63 (0.09-4.51)  | 3.88 (0.50-29.77) | 18.72 (11.63-30.14) | No cases         | 12.39 (10.44-14.69) | 4.45 (3.14-6.29) |
| In long-term care-third wave    | No cases          | No cases          | 3.49 (0.41-29.50)   | No cases         | 1.38 (0.50-3.79)    | 0.28 (0.04-2.04) |
| Any chronic disease             | 1.25 (1.13-1.40)  | 1.03 (0.74-1.44)  | 0.98 (0.74-1.29)    | 1.16 (0.90-1.50) | 1.34 (1.23-1.46)    | 1.27 (1.16-1.39) |
| Immunosuppressed                | 0.90 (0.73-1.12)  | 0.76 (0.42-1.38)  | 0.82 (0.51-1.32)    | 0.81 (0.52-1.27) | 0.88 (0.77-1.01)    | 1.01 (0.87-1.17) |
| Use of ARBs/ACEIs <sup>d</sup>  | 1.21 (1.07-1.38)  | 1.23 (0.85-1.79)  | 1.36 (1.00-1.86)    | 1.08 (0.81-1.45) | 1.25 (1.13-1.38)    | 0.98 (0.87-1.10) |
| Use of proton-pump inhibitors   | 1.14 (1.01-1.28)  | 1.42 (1.02-1.97)  | 1.38 (1.04-1.84)    | 1.18 (0.90-1.56) | 1.33 (1.21-1.45)    | 1.14 (1.03-1.26) |
| No. of physician visits in 2019 |                   |                   |                     |                  |                     |                  |
| 0                               | Ref.              | Ref.              | Ref.                | Ref.             | Ref.                | Ref.             |



|                                 | Northern         |                  | Southern         |                  | Rest of Manitoba |                  |
|---------------------------------|------------------|------------------|------------------|------------------|------------------|------------------|
|                                 | Contact/outbreak | Unknown          | Contact/outbreak | Unknown          | Contact/outbreak | Unknown          |
| 1-3                             | 0.95 (0.88-1.03) | 0.93 (0.66-1.29) | 0.96 (0.75-1.23) | 1.18 (0.86-1.60) | 1.00 (0.91-1.09) | 1.24 (1.11-1.39) |
| 4-8                             | 0.81 (0.73-0.91) | 1.79 (1.27-2.53) | 0.84 (0.64-1.10) | 1.63 (1.21-2.21) | 0.97 (0.88-1.06) | 1.39 (1.25-1.55) |
| ≥9                              | 0.78 (0.68-0.91) | 1.70 (1.09-2.64) | 0.83 (0.61-1.12) | 1.70 (1.23-2.36) | 0.96 (0.86-1.06) | 1.58 (1.41-1.78) |
| No. of hospitalizations in 2019 |                  |                  |                  |                  |                  |                  |
| 0                               | Ref.             | Ref.             | Ref.             | Ref.             | Ref.             | Ref.             |
| 1                               | 1.02 (0.89-1.17) | 1.01 (0.66-1.55) | 0.84 (0.55-1.28) | 0.69 (0.44-1.10) | 1.20 (1.07-1.34) | 1.06 (0.92-1.22) |
| ≥2                              | 1.25 (0.99-1.58) | 1.68 (0.93-3.05) | 0.73 (0.35-1.51) | 0.43 (0.14-1.34) | 1.35 (1.13-1.62) | 1.35 (1.05-1.73) |

<sup>a</sup> Adjusted for age, gender, income quintile, long-term care status, chronic disease, ARB/ACEI use, proton-pump inhibitor use, immunosuppression, and number of physician visits and hospitalizations in 2019. <sup>b</sup> The second wave is from October 1, 2020 to Feb 28, 2021. <sup>c</sup> The third wave is from March 1, 2021 to June 1, 2021. <sup>d</sup> ARBs/ACEIs: Angiotensin receptor blockers and angiotensin converting enzyme inhibitors.

**Supplementary Table 11 Testing and incidence rates (per 1,000 person-years) and test positivity rate (95% confidence interval) according to certain socio-economic and clinical characteristics during the third wave<sup>a</sup> by region and reason for testing**

|                                    | Northern            |                 | Southern         |                | Rest of Manitoba |                 |
|------------------------------------|---------------------|-----------------|------------------|----------------|------------------|-----------------|
|                                    | Contact/outbreak    | Unknown         | Contact/outbreak | Unknown        | Contact/outbreak | Unknown         |
| <b>Testing rates</b>               |                     |                 |                  |                |                  |                 |
| Total                              | 388 (379-397)       | 120 (115-125)   | 24 (23-25)       | 99 (96-102)    | 54 (53-55)       | 139 (138-141)   |
| <b>Age</b>                         |                     |                 |                  |                |                  |                 |
| <10                                | 458 (436-480)       | 117 (106-128)   | 32 (29-36)       | 67 (62-73)     | 88 (84-91)       | 84 (81-87)      |
| 10-17                              | 531 (503-560)       | 78 (68-89)      | 30 (26-35)       | 43 (38-48)     | 96 (92-100)      | 73 (70-76)      |
| 18-29                              | 409 (388-432)       | 128 (117-141)   | 27 (24-31)       | 98 (91-105)    | 62 (60-65)       | 132 (129-136)   |
| 30-49                              | 371 (354-390)       | 121 (111-131)   | 25 (23-28)       | 108 (103-114)  | 55 (54-57)       | 134 (132-137)   |
| 50-64                              | 269 (250-289)       | 132 (119-146)   | 14 (12-16)       | 114 (108-121)  | 35 (34-37)       | 141 (138-144)   |
| ≥65                                | 148 (129-169)       | 175 (154-198)   | 16 (14-20)       | 156 (147-165)  | 23 (22-24)       | 232 (227-236)   |
| <b>Income quintile</b>             |                     |                 |                  |                |                  |                 |
| Q1 (lowest)                        | 875 (849-902)       | 156 (145-168)   | 29 (26-33)       | 90 (84-97)     | 89 (87-92)       | 172 (168-175)   |
| Q2                                 | 323 (309-338)       | 131 (122-141)   | 29 (26-33)       | 100 (93-107)   | 53 (51-55)       | 136 (133-140)   |
| Q3                                 | 210 (185-238)       | 95 (79-115)     | 16 (14-19)       | 99 (93-106)    | 45 (44-47)       | 136 (133-139)   |
| Q4                                 | 149 (136-164)       | 117 (105-129)   | 19 (17-22)       | 87 (82-92)     | 42 (40-43)       | 131 (128-134)   |
| Q5 (highest)                       | 133 (122-145)       | 71 (63-80)      | 24 (21-27)       | 116 (110-123)  | 41 (40-43)       | 120 (117-123)   |
| Unknown                            | 83 (27-259)         | 111 (42-296)    | 36 (30-43)       | 110 (99-121)   | 63 (59-68)       | 145 (138-153)   |
| In long-term care                  | 41 (6-291)          | 82 (20-327)     | 227 (169-306)    | 74 (44-125)    | 193 (170-218)    | 225 (200-253)   |
| <b>COVID-19 vaccination status</b> |                     |                 |                  |                |                  |                 |
| Unvaccinated                       | 406 (396-417)       | 115 (109-120)   | 22 (21-24)       | 88 (85-90)     | 55 (54-56)       | 128 (126-129)   |
| ≥14 days after first dose          | 327 (305-352)       | 140 (126-156)   | 24 (20-29)       | 177 (166-190)  | 47 (44-49)       | 195 (191-200)   |
| ≥7 days after second dose          | 297 (270-327)       | 148 (129-170)   | 75 (62-90)       | 220 (198-245)  | 65 (60-69)       | 218 (210-227)   |
| <b>Incidence rates</b>             |                     |                 |                  |                |                  |                 |
| Total                              | 68.4 (64.7-72.3)    | 3.8 (3.0-4.8)   | 2.5 (2.1-2.9)    | 2.6 (2.2-3.1)  | 6.2 (5.9-6.5)    | 6.3 (6.0-6.6)   |
| <b>Age</b>                         |                     |                 |                  |                |                  |                 |
| <10                                | 100.6 (90.8-111.4)  | 4.6 (2.9-7.4)   | 2.9 (2.0-4.3)    | 0.5 (0.2-1.3)  | 12.4 (11.2-13.6) | 4.9 (4.2-5.8)   |
| 10-17                              | 95.7 (84.5-108.5)   | 1.9 (0.8-4.7)   | 3.2 (2.0-4.9)    | 2.5 (1.5-4.1)  | 11.4 (10.2-12.8) | 6.8 (5.8-7.8)   |
| 18-29                              | 73.7 (65.1-83.5)    | 4.5 (2.7-7.4)   | 3.0 (2.0-4.4)    | 3.3 (2.3-4.8)  | 7.8 (7.0-8.6)    | 10.1 (9.2-11.0) |
| 30-49                              | 55.5 (49.0-63.0)    | 3.6 (2.2-5.9)   | 3.0 (2.2-4.1)    | 2.9 (2.1-4.0)  | 5.0 (4.5-5.6)    | 8.1 (7.4-8.7)   |
| 50-64                              | 38.8 (32.0-46.9)    | 4.4 (2.5-7.7)   | 1.3 (0.7-2.3)    | 3.6 (2.6-5.1)  | 3.9 (3.4-4.4)    | 5.0 (4.5-5.7)   |
| ≥65                                | 18.5 (12.6-27.1)    | 2.1 (0.7-6.6)   | 1.1 (0.6-2.3)    | 2.4 (1.5-3.9)  | 1.9 (1.5-2.3)    | 2.0 (1.7-2.5)   |
| <b>Income quintile</b>             |                     |                 |                  |                |                  |                 |
| Q1 (lowest)                        | 182.5 (170.8-195.1) | 4.6 (3.0-7.0)   | 3.3 (2.3-4.8)    | 3.0 (2.0-4.4)  | 12.4 (11.4-13.4) | 9.5 (8.7-10.4)  |
| Q2                                 | 47.6 (42.2-53.6)    | 2.7 (1.6-4.4)   | 3.0 (2.0-4.4)    | 2.2 (1.4-3.5)  | 6.0 (5.3-6.6)    | 7.0 (6.3-7.7)   |
| Q3                                 | 26.6 (18.7-37.9)    | 2.6 (0.8-8.0)   | 1.8 (1.1-2.9)    | 2.2 (1.4-3.4)  | 5.2 (4.7-5.8)    | 5.3 (4.7-5.9)   |
| Q4                                 | 16.1 (12.2-21.3)    | 5.8 (3.7-9.2)   | 2.1 (1.4-3.0)    | 2.8 (2.0-3.9)  | 4.3 (3.8-4.9)    | 4.8 (4.3-5.5)   |
| Q5 (highest)                       | 13.4 (10.2-17.6)    | 3.1 (1.8-5.5)   | 2.1 (1.4-3.1)    | 2.6 (1.8-3.7)  | 3.2 (2.7-3.7)    | 4.9 (4.4-5.6)   |
| Unknown                            | 27.8 (3.9-197.3)    | 0.0 (0.0-105.5) | 3.7 (2.2-6.4)    | 2.9 (1.5-5.3)  | 6.4 (5.0-8.1)    | 6.4 (5.0-8.1)   |
| In long-term care                  | 0.0 (0.0-151.7)     | 0.0 (0.0-151.7) | 5.3 (0.7-37.5)   | 0.0 (0.0-19.8) | 3.2 (1.2-8.5)    | 0.8 (0.1-5.7)   |
| <b>COVID-19 vaccination status</b> |                     |                 |                  |                |                  |                 |
| Unvaccinated                       | 81.0 (76.6-85.8)    | 4.4 (3.4-5.6)   | 2.6 (2.1-3.1)    | 2.8 (2.3-3.3)  | 6.8 (6.5-7.2)    | 6.9 (6.5-7.2)   |
| ≥14 days after first dose          | 24.9 (19.3-32.2)    | 1.3 (0.4-4.0)   | 1.7 (0.9-3.4)    | 1.7 (0.9-3.4)  | 3.2 (2.6-3.8)    | 4.2 (3.5-5.0)   |
| ≥7 days after second dose          | 7.1 (3.8-13.3)      | 1.4 (0.4-5.7)   | 1.3 (0.3-5.4)    | 0.7 (0.1-4.8)  | 1.3 (0.8-2.2)    | 0.9 (0.5-1.7)   |
| <b>Test positivity</b>             |                     |                 |                  |                |                  |                 |
| Total                              | 17.6 (16.7-18.6)    | 3.1 (2.5-4.0)   | 10.3 (8.7-12.2)  | 2.6 (2.2-3.1)  | 11.4 (10.9-11.9) | 4.5 (4.3-4.7)   |
| <b>Age</b>                         |                     |                 |                  |                |                  |                 |
| <10                                | 22.0 (19.8-24.3)    | 4.0 (2.5-6.4)   | 9.1 (6.1-13.5)   | 0.7 (0.3-1.9)  | 14.1 (12.8-15.6) | 5.9 (5.0-6.9)   |
| 10-17                              | 18.0 (15.9-20.4)    | 2.5 (1.0-6.0)   | 10.5 (6.8-16.3)  | 5.9 (3.6-9.6)  | 11.9 (10.6-13.3) | 9.3 (8.0-10.8)  |
| 18-29                              | 18.0 (15.9-20.4)    | 3.5 (2.1-5.8)   | 11.1 (7.5-16.2)  | 3.4 (2.4-4.9)  | 12.5 (11.2-13.9) | 7.6 (6.9-8.4)   |
| 30-49                              | 15.0 (13.2-17.0)    | 3.0 (1.8-4.9)   | 11.9 (8.8-16.3)  | 2.7 (2.0-3.7)  | 9.1 (8.2-10.0)   | 6.0 (5.5-6.5)   |
| 50-64                              | 14.4 (11.9-17.4)    | 3.3 (1.9-5.9)   | 9.5 (5.4-16.8)   | 3.2 (2.3-4.5)  | 11.0 (9.6-12.6)  | 3.6 (3.2-4.0)   |
| ≥65                                | 12.5 (8.5-18.4)     | 1.2 (0.4-3.8)   | 7.0 (3.5-13.9)   | 1.5 (1.0-2.5)  | 8.2 (6.6-10.1)   | 0.9 (0.7-1.1)   |
| <b>Income quintile</b>             |                     |                 |                  |                |                  |                 |
| Q1 (lowest)                        | 20.9 (19.5-22.3)    | 3.0 (2.0-4.5)   | 11.4 (7.9-16.6)  | 3.3 (2.2-4.9)  | 13.9 (12.8-15.0) | 5.5 (5.1-6.0)   |
| Q2                                 | 14.7 (13.1-16.6)    | 2.0 (1.2-3.4)   | 10.1 (6.8-15.0)  | 2.2 (1.4-3.5)  | 11.2 (10.1-12.5) | 5.1 (4.6-5.7)   |

|                             | Northern         |                 | Southern         |                | Rest of Manitoba |               |
|-----------------------------|------------------|-----------------|------------------|----------------|------------------|---------------|
|                             | Contact/outbreak | Unknown         | Contact/outbreak | Unknown        | Contact/outbreak | Unknown       |
| Q3                          | 12.7 (8.9-18.1)  | 2.7 (0.9-8.4)   | 10.7 (6.6-17.5)  | 2.2 (1.4-3.5)  | 11.5 (10.3-12.9) | 3.9 (3.4-4.3) |
| Q4                          | 10.8 (8.2-14.2)  | 5.0 (3.1-7.9)   | 10.7 (7.4-15.5)  | 3.2 (2.3-4.4)  | 10.3 (9.0-11.8)  | 3.7 (3.3-4.2) |
| Q5 (highest)                | 10.1 (7.7-13.3)  | 4.4 (2.5-7.7)   | 8.6 (5.7-12.9)   | 2.2 (1.6-3.2)  | 7.6 (6.6-8.9)    | 4.1 (3.6-4.6) |
| Unknown                     | 33.3 (4.7-236.6) | 0.0 (0.0-92.2)  | 10.5 (6.1-18.1)  | 2.6 (1.4-4.9)  | 10.1 (7.9-12.8)  | 4.4 (3.4-5.6) |
| In long-term care           | 0.0 (0.0-368.9)  | 0.0 (0.0-184.4) | 2.3 (0.3-16.5)   | 0.0 (0.0-30.7) | 1.7 (0.6-4.4)    | 0.4 (0.0-2.5) |
| COVID-19 vaccination status |                  |                 |                  |                |                  |               |
| Unvaccinated                | 19.9 (18.8-21.1) | 3.8 (3.0-4.9)   | 11.5 (9.6-13.7)  | 3.1 (2.6-3.7)  | 12.5 (11.9-13.1) | 5.4 (5.1-5.6) |
| ≥14 days after first dose   | 7.6 (5.9-9.8)    | 0.9 (0.3-2.9)   | 7.1 (3.6-14.3)   | 1.0 (0.5-1.9)  | 6.8 (5.6-8.2)    | 2.1 (1.8-2.5) |
| ≥7 days after second dose   | 2.4 (1.3-4.5)    | 1.0 (0.2-3.8)   | 1.8 (0.4-7.1)    | 0.3 (0.0-2.2)  | 2.1 (1.3-3.4)    | 0.4 (0.2-0.8) |

<sup>a</sup> The third wave is from March 1, 2021 to June 1, 2021.

**Supplementary Table 12 Secondary attack rates (%) of COVID-19 according to certain socio-economic characteristics of cases and contacts by pandemic stage**

|                                               | Case characteristics    |                          |                         |                  | Contact characteristics |                          |                         |                  |
|-----------------------------------------------|-------------------------|--------------------------|-------------------------|------------------|-------------------------|--------------------------|-------------------------|------------------|
|                                               | First wave <sup>a</sup> | Second wave <sup>b</sup> | Third wave <sup>c</sup> | Overall          | First wave <sup>a</sup> | Second wave <sup>b</sup> | Third wave <sup>c</sup> | Overall          |
| Overall                                       | 9.7 (8.0-11.6)          | 15.9 (15.6-16.1)         | 15.8 (15.6-15.9)        | 15.8 (15.6-15.9) | 9.7 (8.0-11.6)          | 15.9 (15.6-16.1)         | 15.8 (15.6-15.9)        | 15.8 (15.6-15.9) |
| <b>Age</b>                                    |                         |                          |                         |                  |                         |                          |                         |                  |
| <10                                           | 0.0 (0.0-13.7)          | 8.4 (7.9-8.9)            | 8.5 (8.1-9.0)           | 8.5 (8.1-8.8)    | 4.3 (1.2-11.0)          | 11.8 (11.3-12.2)         | 11.9 (11.4-12.3)        | 11.8 (11.5-12.1) |
| 10-17                                         | 0.0 (0.0-92.2)          | 10.1 (9.6-10.6)          | 10.1 (9.6-10.6)         | 10.1 (9.7-10.5)  | 6.0 (1.6-15.3)          | 13.3 (12.8-13.9)         | 13.4 (12.8-14.0)        | 13.3 (13.0-13.7) |
| 18-29                                         | 4.4 (2.7-6.8)           | 15.9 (15.4-16.4)         | 17.5 (16.8-18.1)        | 16.4 (16.1-16.8) | 10.6 (6.9-15.6)         | 17.5 (16.9-18.0)         | 18.2 (17.6-19.0)        | 17.7 (17.3-18.2) |
| 30-49                                         | 11.2 (8.0-15.3)         | 18.1 (17.6-18.6)         | 20.8 (20.2-21.4)        | 19.1 (18.7-19.5) | 9.3 (6.5-12.9)          | 16.7 (16.3-17.2)         | 18.7 (18.1-19.4)        | 17.5 (17.1-17.9) |
| 50-64                                         | 19.0 (13.7-25.7)        | 19.6 (18.9-20.3)         | 20.3 (19.4-21.2)        | 19.8 (19.3-20.4) | 12.8 (8.9-17.9)         | 18.1 (17.5-18.8)         | 17.6 (16.8-18.5)        | 17.9 (17.4-18.4) |
| ≥65                                           | 10.1 (5.5-16.9)         | 21.4 (20.3-22.6)         | 22.6 (20.9-24.4)        | 21.6 (20.7-22.5) | 8.5 (4.7-14.3)          | 22.0 (20.8-23.2)         | 19.7 (18.2-21.2)        | 21.0 (20.0-21.9) |
| <b>Gender</b>                                 |                         |                          |                         |                  |                         |                          |                         |                  |
| Male                                          | 8.4 (6.3-11.0)          | 16.5 (16.1-16.8)         | 16.1 (15.7-16.5)        | 16.3 (16.0-16.5) | 11.1 (8.5-14.3)         | 15.7 (15.4-16.0)         | 15.8 (15.4-16.2)        | 15.7 (15.5-16.0) |
| Female                                        | 11.1 (8.5-14.2)         | 15.1 (14.8-15.4)         | 15.7 (15.3-16.0)        | 15.3 (15.1-15.6) | 8.5 (6.4-11.0)          | 15.8 (15.5-16.2)         | 15.9 (15.5-16.3)        | 15.8 (15.6-16.1) |
| <b>Regional health authority of residence</b> |                         |                          |                         |                  |                         |                          |                         |                  |
| Interlake-Eastern                             | 3.6 (1.6-7.2)           | 14.9 (14.1-15.8)         | 12.8 (11.8-13.8)        | 14.0 (13.3-14.6) | 11.7 (4.7-24.0)         | 14.4 (13.6-15.3)         | 12.3 (11.3-13.3)        | 13.6 (12.9-14.2) |
| Northern                                      | 0.0 (0.0-92.2)          | 19.4 (18.7-20.1)         | 16.4 (15.5-17.3)        | 18.5 (17.9-19.0) | 40.0 (4.8-144.5)        | 19.7 (19.1-20.4)         | 17.0 (16.1-18.0)        | 18.9 (18.4-19.5) |
| Southern                                      | 15.2 (7.8-26.5)         | 14.4 (13.8-15.0)         | 13.6 (12.8-14.5)        | 14.2 (13.7-14.6) | 13.4 (6.7-24.0)         | 13.9 (13.3-14.5)         | 13.8 (13.0-14.7)        | 13.9 (13.4-14.4) |
| Prairie Mountain                              | 9.5 (1.2-34.4)          | 13.4 (12.5-14.3)         | 15.7 (14.7-16.7)        | 14.5 (13.8-15.2) | 14.3 (1.7-51.6)         | 13.8 (12.9-14.8)         | 15.6 (14.6-16.6)        | 14.7 (14.0-15.4) |
| Winnipeg                                      | 10.8 (8.7-13.2)         | 15.5 (15.2-15.8)         | 16.4 (16.1-16.7)        | 15.9 (15.6-16.1) | 9.0 (7.3-11.1)          | 15.5 (15.2-15.8)         | 16.4 (16.1-16.7)        | 15.9 (15.7-16.1) |
| Public Trustee / In CFS care                  | 0.0 (0.0-46.1)          | 16.1 (13.3-19.3)         | 15.9 (12.7-19.6)        | 15.9 (13.8-18.3) | No cases                | 12.3 (9.5-15.6)          | 8.1 (5.7-11.1)          | 10.3 (8.5-12.5)  |
| <b>Income quintile</b>                        |                         |                          |                         |                  |                         |                          |                         |                  |
| Q1 (lowest)                                   | 16.7 (9.1-28.0)         | 17.9 (17.4-18.3)         | 16.6 (16.0-17.1)        | 17.3 (17.0-17.7) | 16.7 (9.1-28.0)         | 17.9 (17.4-18.3)         | 16.6 (16.0-17.1)        | 17.3 (17.0-17.7) |
| Q2                                            | 2.8 (1.4-5.0)           | 15.3 (14.8-15.8)         | 16.2 (15.6-16.8)        | 15.6 (15.2-16.0) | 2.8 (1.4-5.0)           | 15.3 (14.8-15.8)         | 16.2 (15.6-16.8)        | 15.6 (15.2-16.0) |
| Q3                                            | 24.1 (15.9-35.1)        | 15.1 (14.5-15.7)         | 15.7 (15.0-16.4)        | 15.4 (15.0-15.8) | 24.1 (15.9-35.1)        | 15.1 (14.5-15.7)         | 15.7 (15.0-16.4)        | 15.4 (15.0-15.8) |
| Q4                                            | 11.5 (7.6-16.6)         | 15.5 (14.9-16.0)         | 15.6 (15.0-16.3)        | 15.5 (15.1-15.9) | 11.5 (7.6-16.6)         | 15.5 (14.9-16.0)         | 15.6 (15.0-16.3)        | 15.5 (15.1-15.9) |
| Q5 (highest)                                  | 11.2 (7.9-15.5)         | 14.2 (13.6-14.7)         | 14.3 (13.6-15.0)        | 14.2 (13.8-14.6) | 11.2 (7.9-15.5)         | 14.2 (13.6-14.7)         | 14.3 (13.6-15.0)        | 14.2 (13.8-14.6) |
| Unknown                                       | 0.0 (0.0-7.8)           | 12.9 (11.8-14.1)         | 14.9 (13.6-16.3)        | 13.7 (12.8-14.6) | 0.0 (0.0-7.8)           | 12.9 (11.8-14.1)         | 14.9 (13.6-16.3)        | 13.7 (12.8-14.6) |

<sup>a</sup> The first wave is from March 8 to April 11, 2020. <sup>b</sup> The second period is from October 1, 2020 to Feb 28, 2021. <sup>c</sup> The third wave is from March 1, 2021 to June 1, 2021.

**Supplementary Table 13 Adjusted<sup>a</sup> odds ratios (95% confidence interval) of the association between being linked to a super-spreading event and certain socio-economic and clinical characteristics by definition used for R<sub>t</sub>**

|                                               | <b>≥ 4 secondary cases ≥ 6 secondary cases</b> |                   |
|-----------------------------------------------|------------------------------------------------|-------------------|
| <b>Age</b>                                    |                                                |                   |
| <10                                           | 1.44 (1.25-1.66)                               | 1.53 (1.20-1.95)  |
| 10-17                                         | 1.60 (1.39-1.85)                               | 1.69 (1.32-2.15)  |
| 18-29                                         | 1.01 (0.89-1.15)                               | 1.19 (0.96-1.47)  |
| 30-49                                         | Ref.                                           | Ref.              |
| 50-64                                         | 0.77 (0.66-0.90)                               | 0.84 (0.64-1.09)  |
| ≥65                                           | 0.38 (0.29-0.49)                               | 0.29 (0.17-0.49)  |
| Female                                        | 1.01 (0.92-1.10)                               | 1.02 (0.88-1.19)  |
| <b>Income quintile</b>                        |                                                |                   |
| Q1 (lowest)                                   | Ref.                                           | Ref.              |
| Q2                                            | 0.75 (0.67-0.85)                               | 0.78 (0.64-0.95)  |
| Q3                                            | 0.62 (0.54-0.72)                               | 0.52 (0.40-0.68)  |
| Q4                                            | 0.71 (0.62-0.81)                               | 0.60 (0.48-0.76)  |
| Q5 (highest)                                  | 0.64 (0.55-0.74)                               | 0.64 (0.50-0.81)  |
| Unknown                                       | 0.63 (0.46-0.88)                               | 0.37 (0.18-0.75)  |
| <b>Regional health authority of residence</b> |                                                |                   |
| Interlake-Eastern                             | 0.89 (0.73-1.10)                               | 1.17 (0.84-1.63)  |
| Northern                                      | 2.48 (2.21-2.78)                               | 3.17 (2.63-3.81)  |
| Southern                                      | 0.49 (0.40-0.60)                               | 0.61 (0.43-0.86)  |
| Prairie Mountain                              | 1.04 (0.87-1.24)                               | 1.41 (1.06-1.87)  |
| Winnipeg                                      | Ref.                                           | Ref.              |
| Public Trustee / In CFS care                  | 0.91 (0.43-1.91)                               | 1.71 (0.45-6.53)  |
| In long-term care                             | 1.45 (0.57-3.68)                               | 2.62 (0.59-11.58) |
| Any chronic disease                           | 1.27 (1.09-1.48)                               | 1.37 (1.07-1.76)  |
| Immunosuppressed                              | 0.79 (0.38-1.62)                               | No cases          |
| Use of ARCs/ACEIs <sup>b</sup>                | 1.43 (1.21-1.69)                               | 1.66 (1.26-2.18)  |
| Use of proton-pump inhibitor                  | 0.94 (0.79-1.11)                               | 0.88 (0.66-1.17)  |
| <b>No. of physician visits in 2019</b>        |                                                |                   |
| 0                                             | Ref.                                           | Ref.              |
| 1-3                                           | 0.89 (0.78-1.02)                               | 1.03 (0.83-1.29)  |
| 4-8                                           | 0.87 (0.75-1.00)                               | 0.84 (0.66-1.08)  |
| ≥9                                            | 1.00 (0.85-1.17)                               | 1.10 (0.84-1.45)  |
| <b>No. of hospitalizations in 2019</b>        |                                                |                   |
| 0                                             | Ref.                                           | Ref.              |
| 1                                             | 1.22 (1.02-1.46)                               | 1.28 (0.97-1.71)  |
| ≥2                                            | 0.89 (0.62-1.29)                               | 0.56 (0.27-1.15)  |

<sup>a</sup> Adjusted for age, gender, regional health authority of residence, long-term care status, chronic disease, immunosuppression, ARB/ACEI use, proton-pump inhibitor use, and number of physician visits and hospitalizations in 2019. <sup>b</sup> ARBs/ACEIs: Angiotensin receptor blockers and angiotensin converting enzyme inhibitors.

**Supplementary Table 14 Weekly testing rates for SARS-CoV-2 per 1,000 person-years (95% confidence interval) according to gender**

| <b>Week</b>                       | <b>Overall</b> | <b>Male</b>   | <b>Female</b> |
|-----------------------------------|----------------|---------------|---------------|
| March 8-14, 2020                  | 111 (107-115)  | 93 (88-99)    | 129 (123-135) |
| March 15-21, 2020                 | 143 (138-147)  | 123 (117-129) | 163 (156-170) |
| March 22-28, 2020                 | 119 (115-124)  | 95 (90-101)   | 143 (137-150) |
| March 29-April 4, 2020            | 161 (156-166)  | 100 (95-106)  | 221 (213-229) |
| April 5-11, 2020                  | 111 (107-115)  | 73 (68-77)    | 148 (142-155) |
| April 12-18, 2020                 | 93 (90-97)     | 74 (69-79)    | 112 (107-118) |
| April 19-25, 2020                 | 111 (107-115)  | 97 (92-102)   | 125 (119-131) |
| April 26-May 2, 2020              | 145 (140-149)  | 123 (117-129) | 166 (159-173) |
| May 3-9, 2020                     | 129 (124-133)  | 107 (101-112) | 151 (144-157) |
| May 10-16, 2020                   | 149 (144-154)  | 126 (120-132) | 171 (165-179) |
| May 17-23, 2020                   | 155 (150-160)  | 142 (136-149) | 168 (161-175) |
| May 24-30, 2020                   | 198 (193-203)  | 176 (169-184) | 219 (211-227) |
| May 31-June 6, 2020               | 174 (169-179)  | 157 (150-163) | 190 (183-198) |
| June 7-13, 2020                   | 158 (153-163)  | 144 (137-150) | 172 (165-179) |
| June 14-20, 2020                  | 142 (138-147)  | 127 (121-133) | 157 (151-164) |
| June 21-27, 2020                  | 160 (156-165)  | 145 (138-151) | 176 (169-184) |
| June 28-July 4, 2020              | 133 (129-138)  | 118 (113-124) | 148 (142-155) |
| July 5-11, 2020                   | 162 (157-167)  | 146 (140-153) | 177 (170-184) |
| July 12-18, 2020                  | 214 (209-220)  | 193 (185-200) | 235 (227-244) |
| July 19-25, 2020                  | 293 (286-299)  | 259 (250-268) | 326 (317-336) |
| July 26-August 1, 2020            | 326 (320-333)  | 290 (281-300) | 362 (352-372) |
| August 2-8, 2020                  | 366 (359-374)  | 323 (313-332) | 409 (399-420) |
| August 9-15, 2020                 | 407 (400-415)  | 361 (351-371) | 453 (442-464) |
| August 16-22, 2020                | 387 (379-394)  | 346 (336-356) | 427 (417-439) |
| August 23-29, 2020                | 357 (350-364)  | 327 (317-337) | 387 (377-398) |
| August 30-September 5, 2020       | 354 (346-361)  | 312 (302-321) | 395 (385-406) |
| September 6-12, 2020              | 313 (306-320)  | 276 (267-285) | 349 (339-359) |
| September 13-19, 2020             | 416 (408-424)  | 361 (351-372) | 470 (459-482) |
| September 20-26, 2020             | 476 (468-485)  | 422 (411-433) | 530 (518-543) |
| September 27-October 3, 2020      | 550 (541-559)  | 489 (478-501) | 610 (597-623) |
| October 4-10, 2020                | 536 (527-545)  | 490 (478-502) | 581 (569-594) |
| October 11-17, 2020               | 546 (537-555)  | 488 (476-500) | 603 (590-616) |
| October 18-24, 2020               | 643 (634-653)  | 588 (575-602) | 698 (684-712) |
| October 25-31, 2020               | 799 (789-810)  | 733 (719-748) | 865 (850-881) |
| November 1-7, 2020                | 887 (876-899)  | 829 (813-844) | 945 (929-962) |
| November 8-14, 2020               | 727 (717-737)  | 668 (655-682) | 785 (770-800) |
| November 15-21, 2020              | 760 (749-770)  | 685 (671-699) | 834 (819-850) |
| November 22-28, 2020              | 672 (663-682)  | 617 (604-630) | 727 (713-742) |
| November 29-December 5, 2020      | 596 (587-606)  | 546 (534-559) | 646 (632-660) |
| December 6-12, 2020               | 561 (552-570)  | 508 (496-520) | 614 (601-628) |
| December 13-19, 2020              | 520 (511-529)  | 462 (450-474) | 577 (565-591) |
| December 20-26, 2020              | 357 (350-364)  | 332 (322-342) | 382 (371-392) |
| December 27, 2020-January 2, 2021 | 352 (345-359)  | 317 (307-327) | 387 (377-398) |
| January 3-9, 2021                 | 438 (431-446)  | 398 (387-409) | 479 (467-491) |
| January 10-16, 2021               | 435 (427-443)  | 391 (381-402) | 479 (467-491) |
| January 17-23, 2021               | 423 (416-431)  | 391 (381-402) | 455 (444-467) |
| January 24-30, 2021               | 411 (404-419)  | 371 (361-382) | 451 (440-463) |
| January 31-February 6, 2021       | 390 (383-398)  | 360 (350-371) | 420 (409-431) |
| February 7-13, 2021               | 378 (371-386)  | 343 (333-353) | 413 (403-425) |
| February 14-20, 2021              | 403 (395-411)  | 366 (356-377) | 440 (429-451) |
| February 21-27, 2021              | 395 (387-402)  | 369 (359-380) | 420 (409-431) |
| February 28-March 6, 2021         | 403 (396-411)  | 371 (361-382) | 435 (424-446) |
| March 7-13, 2021                  | 422 (414-430)  | 385 (374-396) | 459 (447-470) |
| March 14-20, 2021                 | 454 (446-462)  | 417 (406-428) | 491 (479-503) |
| March 21-27, 2021                 | 481 (473-490)  | 439 (428-450) | 524 (512-536) |
| March 28-April 3, 2021            | 396 (388-404)  | 364 (354-374) | 428 (417-439) |

| <b>Week</b>          | <b>Overall</b> | <b>Male</b>   | <b>Female</b> |
|----------------------|----------------|---------------|---------------|
| April 4-10, 2021     | 526 (517-535)  | 484 (473-496) | 568 (555-580) |
| April 11-17, 2021    | 643 (634-653)  | 593 (580-607) | 693 (679-708) |
| April 18-24, 2021    | 769 (759-780)  | 701 (687-716) | 836 (821-852) |
| April 25-May 1, 2021 | 875 (864-887)  | 808 (793-824) | 942 (926-959) |
| May 2-8, 2021        | 888 (876-899)  | 830 (814-845) | 945 (929-962) |
| May 9-15, 2021       | 889 (878-901)  | 835 (819-850) | 943 (927-960) |
| May 16-22, 2021      | 799 (788-809)  | 758 (743-773) | 839 (823-855) |
| May 23-29, 2021      | 655 (645-665)  | 593 (580-606) | 716 (701-730) |

**Supplementary Table 15 Weekly testing rates for SARS-CoV-2 per 1,000 person-years (95% confidence interval) according to income quintile**

| Week                              | Overall       | Q1 (lowest)   | Q2            | Q3            | Q4            | Q5 (highest)  |
|-----------------------------------|---------------|---------------|---------------|---------------|---------------|---------------|
| March 8-14, 2020                  | 111 (107-115) | 84 (76-92)    | 88 (80-96)    | 113 (104-122) | 121 (112-131) | 148 (138-159) |
| March 15-21, 2020                 | 143 (138-147) | 107 (98-116)  | 124 (115-134) | 133 (124-143) | 160 (150-171) | 190 (178-202) |
| March 22-28, 2020                 | 119 (115-124) | 88 (81-97)    | 113 (104-122) | 115 (107-125) | 124 (115-134) | 151 (140-162) |
| March 29-April 4, 2020            | 161 (156-166) | 156 (146-168) | 157 (147-168) | 162 (151-173) | 160 (150-171) | 154 (144-166) |
| April 5-11, 2020                  | 111 (107-115) | 119 (110-129) | 112 (104-122) | 109 (101-119) | 99 (91-108)   | 100 (91-109)  |
| April 12-18, 2020                 | 93 (90-97)    | 97 (89-106)   | 97 (89-106)   | 85 (78-94)    | 91 (83-100)   | 84 (76-92)    |
| April 19-25, 2020                 | 111 (107-115) | 123 (113-133) | 124 (115-134) | 103 (95-112)  | 101 (93-110)  | 98 (90-107)   |
| April 26-May 2, 2020              | 145 (140-149) | 153 (143-165) | 140 (130-150) | 140 (130-151) | 142 (132-152) | 152 (142-163) |
| May 3-9, 2020                     | 129 (124-133) | 147 (137-158) | 131 (121-141) | 127 (117-137) | 120 (111-130) | 116 (107-126) |
| May 10-16, 2020                   | 149 (144-154) | 163 (153-175) | 152 (142-163) | 151 (141-162) | 146 (136-157) | 133 (124-144) |
| May 17-23, 2020                   | 155 (150-160) | 169 (158-181) | 158 (148-169) | 148 (138-159) | 153 (143-164) | 141 (131-152) |
| May 24-30, 2020                   | 198 (193-203) | 219 (206-232) | 199 (187-212) | 188 (177-200) | 200 (189-213) | 184 (173-196) |
| May 31-June 6, 2020               | 174 (169-179) | 193 (181-206) | 175 (164-187) | 172 (161-184) | 161 (150-172) | 164 (153-175) |
| June 7-13, 2020                   | 158 (153-163) | 174 (163-186) | 167 (156-178) | 155 (145-167) | 144 (134-155) | 146 (136-157) |
| June 14-20, 2020                  | 142 (138-147) | 173 (162-185) | 140 (130-151) | 138 (128-148) | 137 (127-147) | 118 (109-128) |
| June 21-27, 2020                  | 160 (156-165) | 173 (162-185) | 154 (143-165) | 161 (150-172) | 163 (152-174) | 148 (138-159) |
| June 28-July 4, 2020              | 133 (129-138) | 148 (138-159) | 127 (118-137) | 126 (116-136) | 139 (129-149) | 122 (113-132) |
| July 5-11, 2020                   | 162 (157-167) | 165 (154-176) | 161 (150-172) | 161 (151-172) | 166 (156-178) | 145 (135-156) |
| July 12-18, 2020                  | 214 (209-220) | 196 (184-208) | 206 (194-219) | 219 (207-233) | 219 (207-233) | 216 (204-229) |
| July 19-25, 2020                  | 293 (286-299) | 271 (257-286) | 297 (282-312) | 317 (302-332) | 285 (271-300) | 290 (276-305) |
| July 26-August 1, 2020            | 326 (320-333) | 285 (271-300) | 344 (328-360) | 335 (320-351) | 333 (318-349) | 326 (311-342) |
| August 2-8, 2020                  | 366 (359-374) | 306 (291-321) | 377 (360-394) | 373 (357-390) | 399 (382-416) | 382 (366-400) |
| August 9-15, 2020                 | 407 (400-415) | 373 (356-390) | 414 (397-432) | 417 (400-435) | 421 (404-439) | 412 (395-430) |
| August 16-22, 2020                | 387 (379-394) | 341 (325-357) | 348 (332-364) | 409 (392-427) | 418 (400-436) | 419 (401-437) |
| August 23-29, 2020                | 357 (350-364) | 339 (323-355) | 353 (338-370) | 369 (352-385) | 378 (361-395) | 348 (333-365) |
| August 30-September 5, 2020       | 354 (346-361) | 339 (324-356) | 349 (333-365) | 342 (327-359) | 354 (338-370) | 353 (337-370) |
| September 6-12, 2020              | 313 (306-320) | 312 (297-327) | 321 (306-337) | 291 (277-306) | 313 (298-329) | 322 (307-338) |
| September 13-19, 2020             | 416 (408-424) | 410 (393-428) | 403 (386-421) | 389 (372-406) | 399 (382-416) | 475 (457-495) |
| September 20-26, 2020             | 476 (468-485) | 408 (391-426) | 444 (427-463) | 486 (467-505) | 462 (444-481) | 563 (543-584) |
| September 27-October 3, 2020      | 550 (541-559) | 501 (482-521) | 524 (505-544) | 546 (526-566) | 553 (533-573) | 603 (582-624) |
| October 4-10, 2020                | 536 (527-545) | 561 (541-582) | 489 (471-509) | 530 (510-550) | 531 (511-551) | 551 (531-571) |
| October 11-17, 2020               | 546 (537-555) | 553 (533-574) | 531 (512-552) | 528 (508-548) | 537 (517-557) | 573 (552-594) |
| October 18-24, 2020               | 643 (634-653) | 647 (626-670) | 607 (587-629) | 676 (654-699) | 635 (614-657) | 627 (606-649) |
| October 25-31, 2020               | 799 (789-810) | 821 (796-846) | 771 (747-795) | 815 (790-840) | 761 (737-785) | 812 (788-837) |
| November 1-7, 2020                | 887 (876-899) | 900 (875-927) | 834 (809-859) | 889 (864-915) | 909 (883-935) | 886 (861-912) |
| November 8-14, 2020               | 727 (717-737) | 711 (688-734) | 736 (713-759) | 715 (692-738) | 741 (718-765) | 675 (653-698) |
| November 15-21, 2020              | 760 (749-770) | 768 (744-793) | 777 (753-801) | 746 (723-770) | 753 (729-777) | 674 (652-697) |
| November 22-28, 2020              | 672 (663-682) | 781 (757-805) | 690 (667-713) | 630 (608-652) | 647 (625-669) | 576 (555-597) |
| November 29-December 5, 2020      | 596 (587-606) | 734 (711-758) | 624 (602-645) | 550 (530-571) | 542 (522-563) | 486 (467-505) |
| December 6-12, 2020               | 561 (552-570) | 752 (728-776) | 576 (556-597) | 496 (477-515) | 484 (465-503) | 466 (448-486) |
| December 13-19, 2020              | 520 (511-529) | 680 (658-704) | 540 (520-560) | 425 (407-443) | 459 (441-478) | 467 (449-487) |
| December 20-26, 2020              | 357 (350-364) | 475 (456-495) | 364 (348-381) | 293 (279-309) | 313 (298-329) | 319 (304-335) |
| December 27, 2020-January 2, 2021 | 352 (345-359) | 446 (428-465) | 355 (339-371) | 334 (319-350) | 313 (298-329) | 285 (270-300) |
| January 3-9, 2021                 | 438 (431-446) | 610 (589-632) | 419 (402-437) | 362 (346-379) | 412 (395-430) | 360 (343-376) |
| January 10-16, 2021               | 435 (427-443) | 602 (581-624) | 480 (461-499) | 342 (327-359) | 367 (350-384) | 370 (354-388) |
| January 17-23, 2021               | 423 (416-431) | 630 (608-652) | 434 (417-453) | 338 (322-354) | 337 (322-353) | 382 (365-399) |
| January 24-30, 2021               | 411 (404-419) | 570 (549-591) | 429 (412-447) | 352 (337-369) | 351 (335-367) | 355 (339-372) |
| January 31-February 6, 2021       | 390 (383-398) | 476 (457-495) | 414 (397-432) | 351 (335-368) | 341 (325-357) | 358 (342-375) |
| February 7-13, 2021               | 378 (371-386) | 527 (507-548) | 354 (338-370) | 318 (303-334) | 318 (303-334) | 357 (341-374) |
| February 14-20, 2021              | 403 (395-411) | 538 (518-559) | 373 (357-390) | 356 (340-373) | 356 (340-373) | 366 (350-383) |
| February 21-27, 2021              | 395 (387-402) | 489 (470-509) | 397 (380-414) | 340 (324-356) | 355 (339-372) | 383 (366-400) |
| February 28-March 6, 2021         | 403 (396-411) | 516 (497-537) | 403 (386-421) | 363 (346-379) | 343 (327-359) | 389 (372-406) |
| March 7-13, 2021                  | 422 (414-430) | 580 (559-602) | 419 (401-437) | 375 (358-392) | 371 (355-388) | 364 (348-381) |
| March 14-20, 2021                 | 454 (446-462) | 623 (602-646) | 438 (420-457) | 406 (389-424) | 424 (406-442) | 384 (368-402) |
| March 21-27, 2021                 | 481 (473-490) | 592 (571-614) | 477 (458-496) | 412 (395-430) | 445 (427-464) | 459 (441-478) |
| March 28-April 3, 2021            | 396 (388-404) | 525 (505-546) | 389 (372-406) | 356 (340-373) | 367 (351-384) | 341 (325-357) |



| <b>Week</b>          | <b>Overall</b> | <b>Q1 (lowest)</b> | <b>Q2</b>       | <b>Q3</b>     | <b>Q4</b>     | <b>Q5 (highest)</b> |
|----------------------|----------------|--------------------|-----------------|---------------|---------------|---------------------|
| April 4-10, 2021     | 526 (517-535)  | 593 (572-615)      | 559 (539-580)   | 464 (446-483) | 518 (498-538) | 497 (478-516)       |
| April 11-17, 2021    | 643 (634-653)  | 725 (701-749)      | 658 (636-681)   | 631 (610-653) | 577 (557-599) | 635 (614-658)       |
| April 18-24, 2021    | 769 (759-780)  | 816 (791-842)      | 786 (763-811)   | 746 (723-770) | 722 (699-745) | 781 (757-806)       |
| April 25-May 1, 2021 | 875 (864-887)  | 919 (893-947)      | 902 (876-928)   | 811 (787-837) | 829 (804-854) | 915 (889-942)       |
| May 2-8, 2021        | 888 (876-899)  | 1,024 (996-1,053)  | 976 (950-1,004) | 853 (828-879) | 789 (765-814) | 786 (762-811)       |
| May 9-15, 2021       | 889 (878-901)  | 994 (966-1,022)    | 969 (942-996)   | 851 (826-877) | 816 (792-842) | 782 (758-806)       |
| May 16-22, 2021      | 799 (788-809)  | 973 (946-1,001)    | 867 (842-893)   | 743 (719-767) | 732 (709-756) | 675 (652-698)       |
| May 23-29, 2021      | 655 (645-665)  | 800 (775-825)      | 678 (656-701)   | 622 (600-644) | 610 (589-632) | 552 (532-572)       |

**Supplementary Table 16 Weekly incidence rates of COVID-19 per 1,000 person-years (95% confidence interval) according to gender**

| <b>Week</b>                       | <b>Overall</b>    | <b>Male</b>      | <b>Female</b>       |
|-----------------------------------|-------------------|------------------|---------------------|
| March 8-14, 2020                  | 0.6 (0.3-0.9)     | 0.5 (0.3-1.1)    | 0.6 (0.3-1.2)       |
| March 15-21, 2020                 | 1.5 (1.1-2.1)     | 1.5 (1.0-2.3)    | 1.6 (1.0-2.4)       |
| March 22-28, 2020                 | 3.9 (3.2-4.7)     | 3.4 (2.5-4.6)    | 4.3 (3.3-5.6)       |
| March 29-April 4, 2020            | 1.9 (1.5-2.5)     | 2.2 (1.5-3.2)    | 1.6 (1.1-2.5)       |
| April 5-11, 2020                  | 0.8 (0.5-1.2)     | 0.9 (0.5-1.6)    | 0.7 (0.3-1.3)       |
| April 12-18, 2020                 | 0.5 (0.3-0.8)     | 0.3 (0.1-0.8)    | 0.7 (0.3-1.3)       |
| April 19-25, 2020                 | 0.6 (0.3-0.9)     | 0.5 (0.3-1.1)    | 0.6 (0.3-1.2)       |
| April 26-May 2, 2020              | 0.3 (0.2-0.6)     | 0.4 (0.2-0.9)    | 0.2 (0.1-0.7)       |
| May 3-9, 2020                     | 0.2 (0.1-0.5)     | 0.2 (0.1-0.7)    | 0.2 (0.1-0.7)       |
| May 10-16, 2020                   | 0.0 (0.0-0.3)     | 0.1 (0.0-0.5)    | 0.0 (0.0-0.3)       |
| May 17-23, 2020                   | 0.1 (0.0-0.3)     | 0.1 (0.0-0.5)    | 0.1 (0.0-0.5)       |
| May 24-30, 2020                   | 0.2 (0.1-0.5)     | 0.5 (0.2-1.0)    | 0.0 (0.0-0.3)       |
| May 31-June 6, 2020               | 0.1 (0.0-0.3)     | 0.2 (0.0-0.6)    | 0.0 (0.0-0.3)       |
| June 7-13, 2020                   | 0.2 (0.1-0.5)     | 0.5 (0.2-1.0)    | 0.0 (0.0-0.3)       |
| June 14-20, 2020                  | 0.3 (0.1-0.6)     | 0.3 (0.1-0.8)    | 0.2 (0.1-0.7)       |
| June 21-27, 2020                  | 0.3 (0.2-0.6)     | 0.5 (0.2-1.0)    | 0.2 (0.1-0.7)       |
| June 28-July 4, 2020              | 0.0 (0.0-0.2)     | 0.0 (0.0-0.3)    | 0.0 (0.0-0.3)       |
| July 5-11, 2020                   | 0.1 (0.1-0.4)     | 0.2 (0.0-0.6)    | 0.1 (0.0-0.6)       |
| July 12-18, 2020                  | 1.6 (1.2-2.2)     | 1.1 (0.7-1.9)    | 2.2 (1.5-3.1)       |
| July 19-25, 2020                  | 0.9 (0.6-1.3)     | 1.1 (0.6-1.8)    | 0.7 (0.4-1.4)       |
| July 26-August 1, 2020            | 1.4 (1.0-1.9)     | 1.3 (0.8-2.1)    | 1.5 (1.0-2.3)       |
| August 2-8, 2020                  | 4.5 (3.7-5.3)     | 5.1 (4.0-6.5)    | 3.8 (2.9-5.0)       |
| August 9-15, 2020                 | 7.0 (6.0-8.0)     | 7.4 (6.0-9.0)    | 6.5 (5.3-8.1)       |
| August 16-22, 2020                | 10.2 (9.0-11.5)   | 10.2 (8.6-12.0)  | 10.2 (8.6-12.0)     |
| August 23-29, 2020                | 6.2 (5.4-7.3)     | 5.8 (4.6-7.2)    | 6.7 (5.4-8.2)       |
| August 30-September 5, 2020       | 4.2 (3.5-5.0)     | 4.2 (3.2-5.5)    | 4.2 (3.2-5.4)       |
| September 6-12, 2020              | 4.1 (3.4-5.0)     | 3.7 (2.8-4.9)    | 4.6 (3.6-5.9)       |
| September 13-19, 2020             | 9.3 (8.2-10.5)    | 8.3 (6.9-10.0)   | 10.2 (8.6-12.0)     |
| September 20-26, 2020             | 9.3 (8.2-10.5)    | 9.8 (8.2-11.6)   | 8.8 (7.4-10.6)      |
| September 27-October 3, 2020      | 12.7 (11.5-14.2)  | 11.3 (9.7-13.3)  | 14.1 (12.3-16.3)    |
| October 4-10, 2020                | 20.3 (18.7-22.1)  | 19.5 (17.3-22.1) | 21.0 (18.7-23.6)    |
| October 11-17, 2020               | 25.9 (24.1-27.9)  | 28.3 (25.5-31.3) | 23.6 (21.2-26.4)    |
| October 18-24, 2020               | 51.1 (48.5-53.9)  | 49.2 (45.6-53.2) | 53.0 (49.2-57.0)    |
| October 25-31, 2020               | 69.9 (66.8-73.1)  | 71.6 (67.2-76.3) | 68.1 (63.8-72.7)    |
| November 1-7, 2020                | 86.9 (83.4-90.5)  | 88.8 (83.9-94.0) | 85.0 (80.2-90.0)    |
| November 8-14, 2020               | 93.6 (90.0-97.4)  | 93.8 (88.7-99.2) | 93.4 (88.4-98.7)    |
| November 15-21, 2020              | 99.1 (95.4-102.9) | 92.6 (87.5-97.9) | 105.5 (100.2-111.2) |
| November 22-28, 2020              | 85.8 (82.4-89.4)  | 80.9 (76.2-85.9) | 90.7 (85.7-95.9)    |
| November 29-December 5, 2020      | 81.1 (77.7-84.6)  | 78.4 (73.8-83.3) | 83.7 (78.9-88.8)    |
| December 6-12, 2020               | 68.6 (65.5-71.9)  | 70.0 (65.6-74.6) | 67.3 (63.0-71.8)    |
| December 13-19, 2020              | 56.2 (53.4-59.1)  | 55.8 (51.9-60.0) | 56.6 (52.7-60.8)    |
| December 20-26, 2020              | 38.2 (35.9-40.6)  | 40.1 (36.8-43.7) | 36.3 (33.2-39.7)    |
| December 27, 2020-January 2, 2021 | 35.7 (33.5-38.0)  | 33.1 (30.1-36.3) | 38.3 (35.1-41.7)    |
| January 3-9, 2021                 | 45.7 (43.2-48.4)  | 43.5 (40.1-47.2) | 48.0 (44.4-51.8)    |
| January 10-16, 2021               | 43.3 (40.9-45.9)  | 42.8 (39.4-46.5) | 43.8 (40.4-47.5)    |
| January 17-23, 2021               | 39.6 (37.3-42.1)  | 40.0 (36.8-43.6) | 39.2 (36.0-42.7)    |
| January 24-30, 2021               | 27.8 (25.9-29.9)  | 27.6 (24.9-30.6) | 28.0 (25.3-31.0)    |
| January 31-February 6, 2021       | 18.8 (17.2-20.5)  | 17.5 (15.4-20.0) | 19.9 (17.7-22.5)    |
| February 7-13, 2021               | 21.6 (19.9-23.5)  | 21.3 (19.0-24.0) | 21.9 (19.5-24.6)    |
| February 14-20, 2021              | 19.0 (17.4-20.8)  | 17.8 (15.6-20.2) | 20.3 (18.0-22.8)    |
| February 21-27, 2021              | 13.5 (12.2-15.0)  | 13.3 (11.5-15.4) | 13.8 (11.9-15.9)    |
| February 28-March 6, 2021         | 13.9 (12.6-15.4)  | 13.4 (11.5-15.5) | 14.5 (12.5-16.6)    |
| March 7-13, 2021                  | 19.5 (17.9-21.3)  | 19.0 (16.8-21.5) | 20.1 (17.8-22.7)    |
| March 14-20, 2021                 | 21.1 (19.4-23.0)  | 22.1 (19.7-24.8) | 20.2 (17.9-22.7)    |
| March 21-27, 2021                 | 18.1 (16.6-19.8)  | 18.4 (16.2-20.8) | 17.9 (15.8-20.3)    |
| March 28-April 3, 2021            | 19.0 (17.4-20.7)  | 20.0 (17.7-22.5) | 18.0 (15.8-20.4)    |

| <b>Week</b>          | <b>Overall</b>      | <b>Male</b>         | <b>Female</b>       |
|----------------------|---------------------|---------------------|---------------------|
| April 4-10, 2021     | 28.7 (26.7-30.8)    | 28.3 (25.6-31.3)    | 29.0 (26.3-32.1)    |
| April 11-17, 2021    | 35.2 (33.0-37.5)    | 33.5 (30.6-36.8)    | 36.9 (33.8-40.3)    |
| April 18-24, 2021    | 54.3 (51.6-57.2)    | 55.0 (51.1-59.1)    | 53.7 (49.9-57.8)    |
| April 25-May 1, 2021 | 65.0 (62.0-68.1)    | 66.0 (61.8-70.6)    | 64.0 (59.8-68.4)    |
| May 2-8, 2021        | 96.9 (93.2-100.7)   | 100.6 (95.3-106.2)  | 93.3 (88.2-98.6)    |
| May 9-15, 2021       | 109.1 (105.2-113.2) | 106.6 (101.2-112.4) | 111.5 (106.0-117.3) |
| May 16-22, 2021      | 105.1 (101.3-109.1) | 107.0 (101.6-112.8) | 103.2 (97.9-108.9)  |
| May 23-29, 2021      | 75.3 (72.0-78.7)    | 74.8 (70.2-79.6)    | 75.8 (71.2-80.6)    |

**Supplementary Table 17 Weekly incidence rates of COVID-19 per 1,000 person-years (95% confidence interval) according to age**

| Week                              | Overall           | <10              | 10-17            | 18-29               | 30-49              | 50-64             | ≥65                 |
|-----------------------------------|-------------------|------------------|------------------|---------------------|--------------------|-------------------|---------------------|
| March 8-14, 2020                  | 0.6 (0.3-0.9)     | 0.0 (0.0-1.3)    | 0.0 (0.0-1.6)    | 0.0 (0.0-1.0)       | 0.6 (0.2-1.5)      | 0.8 (0.3-2.1)     | 1.6 (0.8-3.4)       |
| March 15-21, 2020                 | 1.5 (1.1-2.1)     | 0.0 (0.0-1.3)    | 0.0 (0.0-1.6)    | 3.8 (2.3-6.1)       | 2.3 (1.4-3.7)      | 0.8 (0.3-2.1)     | 1.2 (0.5-2.8)       |
| March 22-28, 2020                 | 3.9 (3.2-4.7)     | 0.9 (0.3-2.8)    | 0.0 (0.0-1.6)    | 6.1 (4.2-9.0)       | 3.5 (2.4-5.2)      | 6.6 (4.7-9.3)     | 3.7 (2.3-6.1)       |
| March 29-April 4, 2020            | 1.9 (1.5-2.5)     | 0.3 (0.0-2.1)    | 0.0 (0.0-1.6)    | 2.4 (1.3-4.4)       | 2.1 (1.3-3.5)      | 3.2 (2.0-5.2)     | 2.1 (1.1-4.0)       |
| April 5-11, 2020                  | 0.8 (0.5-1.2)     | 0.0 (0.0-1.3)    | 0.4 (0.1-2.7)    | 0.9 (0.4-2.5)       | 0.8 (0.4-1.9)      | 1.0 (0.4-2.4)     | 1.2 (0.5-2.8)       |
| April 12-18, 2020                 | 0.5 (0.3-0.8)     | 0.0 (0.0-1.3)    | 0.0 (0.0-1.6)    | 1.2 (0.5-2.8)       | 0.6 (0.2-1.5)      | 0.2 (0.0-1.4)     | 0.7 (0.2-2.2)       |
| April 19-25, 2020                 | 0.6 (0.3-0.9)     | 0.0 (0.0-1.3)    | 0.0 (0.0-1.6)    | 0.5 (0.1-1.9)       | 1.3 (0.7-2.4)      | 0.0 (0.0-0.9)     | 0.9 (0.4-2.5)       |
| April 26-May 2, 2020              | 0.3 (0.2-0.6)     | 0.0 (0.0-1.3)    | 0.0 (0.0-1.6)    | 0.2 (0.0-1.7)       | 0.6 (0.2-1.5)      | 0.0 (0.0-0.9)     | 0.7 (0.2-2.2)       |
| May 3-9, 2020                     | 0.2 (0.1-0.5)     | 0.3 (0.0-2.1)    | 0.0 (0.0-1.6)    | 0.5 (0.1-1.9)       | 0.4 (0.1-1.3)      | 0.0 (0.0-0.9)     | 0.0 (0.0-1.0)       |
| May 10-16, 2020                   | 0.0 (0.0-0.3)     | 0.0 (0.0-1.3)    | 0.0 (0.0-1.6)    | 0.0 (0.0-1.0)       | 0.1 (0.0-1.0)      | 0.0 (0.0-0.9)     | 0.0 (0.0-1.0)       |
| May 17-23, 2020                   | 0.1 (0.0-0.3)     | 0.3 (0.0-2.1)    | 0.0 (0.0-1.6)    | 0.0 (0.0-1.0)       | 0.1 (0.0-1.0)      | 0.0 (0.0-0.9)     | 0.0 (0.0-1.0)       |
| May 24-30, 2020                   | 0.2 (0.1-0.5)     | 0.0 (0.0-1.3)    | 0.0 (0.0-1.6)    | 0.5 (0.1-1.9)       | 0.3 (0.1-1.1)      | 0.4 (0.1-1.6)     | 0.0 (0.0-1.0)       |
| May 31-June 6, 2020               | 0.1 (0.0-0.3)     | 0.0 (0.0-1.3)    | 0.0 (0.0-1.6)    | 0.2 (0.0-1.7)       | 0.1 (0.0-1.0)      | 0.0 (0.0-0.9)     | 0.0 (0.0-1.0)       |
| June 7-13, 2020                   | 0.2 (0.1-0.5)     | 0.0 (0.0-1.3)    | 0.4 (0.1-2.7)    | 0.2 (0.0-1.7)       | 0.6 (0.2-1.5)      | 0.0 (0.0-0.9)     | 0.0 (0.0-1.0)       |
| June 14-20, 2020                  | 0.3 (0.1-0.6)     | 0.0 (0.0-1.3)    | 0.0 (0.0-1.6)    | 0.2 (0.0-1.7)       | 0.6 (0.2-1.5)      | 0.4 (0.1-1.6)     | 0.0 (0.0-1.0)       |
| June 21-27, 2020                  | 0.3 (0.2-0.6)     | 0.0 (0.0-1.3)    | 0.0 (0.0-1.6)    | 0.5 (0.1-1.9)       | 0.8 (0.4-1.9)      | 0.2 (0.0-1.4)     | 0.0 (0.0-1.0)       |
| June 28-July 4, 2020              | 0.0 (0.0-0.2)     | 0.0 (0.0-1.3)    | 0.0 (0.0-1.6)    | 0.0 (0.0-1.0)       | 0.0 (0.0-0.6)      | 0.0 (0.0-0.9)     | 0.0 (0.0-1.0)       |
| July 5-11, 2020                   | 0.1 (0.1-0.4)     | 0.0 (0.0-1.3)    | 0.4 (0.1-2.7)    | 0.5 (0.1-1.9)       | 0.1 (0.0-1.0)      | 0.0 (0.0-0.9)     | 0.0 (0.0-1.0)       |
| July 12-18, 2020                  | 1.6 (1.2-2.2)     | 0.0 (0.0-1.3)    | 0.0 (0.0-1.6)    | 2.8 (1.6-4.9)       | 2.0 (1.2-3.3)      | 2.0 (1.1-3.7)     | 1.9 (0.9-3.8)       |
| July 19-25, 2020                  | 0.9 (0.6-1.3)     | 0.6 (0.1-2.4)    | 0.8 (0.2-3.0)    | 1.4 (0.6-3.1)       | 0.8 (0.4-1.9)      | 1.0 (0.4-2.4)     | 0.7 (0.2-2.2)       |
| July 26-August 1, 2020            | 1.4 (1.0-1.9)     | 0.0 (0.0-1.3)    | 0.0 (0.0-1.6)    | 1.6 (0.8-3.4)       | 3.2 (2.2-4.9)      | 0.4 (0.1-1.6)     | 1.2 (0.5-2.8)       |
| August 2-8, 2020                  | 4.5 (3.7-5.3)     | 2.4 (1.2-4.7)    | 3.8 (2.0-7.1)    | 7.7 (5.5-10.9)      | 7.0 (5.3-9.3)      | 2.2 (1.2-4.0)     | 1.6 (0.8-3.5)       |
| August 9-15, 2020                 | 7.0 (6.0-8.0)     | 5.6 (3.6-8.8)    | 6.5 (4.0-10.4)   | 6.8 (4.7-9.8)       | 10.1 (8.1-12.8)    | 6.6 (4.7-9.3)     | 3.8 (2.3-6.2)       |
| August 16-22, 2020                | 10.2 (9.0-11.5)   | 2.7 (1.4-5.1)    | 11.0 (7.7-15.9)  | 15.4 (12.1-19.6)    | 13.4 (11.0-16.4)   | 10.1 (7.6-13.3)   | 5.4 (3.6-8.2)       |
| August 23-29, 2020                | 6.2 (5.4-7.3)     | 2.1 (1.0-4.3)    | 11.4 (8.0-16.3)  | 8.4 (6.1-11.7)      | 6.8 (5.1-9.0)      | 5.8 (4.1-8.4)     | 4.0 (2.5-6.5)       |
| August 30-September 5, 2020       | 4.2 (3.5-5.0)     | 2.4 (1.2-4.7)    | 4.2 (2.3-7.6)    | 5.4 (3.6-8.1)       | 5.1 (3.7-7.0)      | 3.6 (2.3-5.7)     | 3.8 (2.3-6.2)       |
| September 6-12, 2020              | 4.1 (3.4-5.0)     | 2.7 (1.4-5.1)    | 3.8 (2.0-7.1)    | 5.1 (3.4-7.8)       | 4.7 (3.3-6.5)      | 5.4 (3.7-7.9)     | 2.4 (1.3-4.4)       |
| September 13-19, 2020             | 9.3 (8.2-10.5)    | 4.1 (2.5-7.0)    | 13.3 (9.6-18.5)  | 25.9 (21.5-31.2)    | 5.6 (4.1-7.7)      | 3.8 (2.4-6.0)     | 6.9 (4.8-9.9)       |
| September 20-26, 2020             | 9.3 (8.2-10.5)    | 4.7 (2.9-7.7)    | 8.7 (5.8-13.2)   | 15.7 (12.3-19.9)    | 10.4 (8.3-13.1)    | 7.4 (5.4-10.3)    | 7.1 (5.0-10.2)      |
| September 27-October 3, 2020      | 12.7 (11.5-14.2)  | 8.0 (5.5-11.6)   | 8.0 (5.2-12.2)   | 18.5 (14.8-23.0)    | 14.2 (11.7-17.3)   | 14.7 (11.7-18.5)  | 9.5 (7.0-12.9)      |
| October 4-10, 2020                | 20.3 (18.7-22.1)  | 11.2 (8.2-15.4)  | 15.2 (11.2-20.7) | 25.5 (21.1-30.7)    | 24.2 (20.9-28.1)   | 20.5 (16.9-24.9)  | 19.0 (15.2-23.6)    |
| October 11-17, 2020               | 25.9 (24.1-27.9)  | 14.8 (11.2-19.5) | 23.2 (18.1-29.8) | 33.6 (28.6-39.6)    | 32.0 (28.1-36.4)   | 24.6 (20.6-29.3)  | 20.7 (16.7-25.5)    |
| October 18-24, 2020               | 51.1 (48.5-53.9)  | 25.1 (20.3-31.1) | 51.8 (43.8-61.2) | 56.3 (49.6-63.9)    | 63.9 (58.3-70.1)   | 47.8 (42.1-54.3)  | 50.9 (44.5-58.2)    |
| October 25-31, 2020               | 69.9 (66.8-73.1)  | 31.4 (25.9-37.9) | 79.3 (69.2-90.8) | 101.2 (92.1-111.2)  | 76.8 (70.6-83.5)   | 76.3 (69.0-84.4)  | 46.4 (40.4-53.4)    |
| November 1-7, 2020                | 86.9 (83.4-90.5)  | 47.1 (40.3-55.0) | 83.2 (72.8-95.0) | 113.9 (104.2-124.5) | 92.7 (85.9-100.1)  | 91.5 (83.5-100.4) | 81.1 (72.9-90.2)    |
| November 8-14, 2020               | 93.6 (90.0-97.4)  | 48.3 (41.4-56.3) | 74.1 (64.4-85.3) | 116.1 (106.3-126.8) | 101.5 (94.3-109.2) | 91.5 (83.4-100.3) | 111.5 (101.8-122.0) |
| November 15-21, 2020              | 99.1 (95.4-102.9) | 55.8 (48.3-64.3) | 81.5 (71.2-93.2) | 120.0 (110.0-130.8) | 106.8 (99.4-114.7) | 95.9 (87.7-105.0) | 119.0 (108.9-129.9) |
| November 22-28, 2020              | 85.8 (82.4-89.4)  | 48.7 (41.8-56.7) | 75.1 (65.3-86.3) | 98.3 (89.3-108.1)   | 97.1 (90.1-104.7)  | 78.8 (71.3-87.1)  | 101.7 (92.5-111.9)  |
| November 29-December 5, 2020      | 81.1 (77.7-84.6)  | 56.7 (49.2-65.4) | 75.2 (65.3-86.5) | 97.0 (88.1-106.8)   | 84.9 (78.4-92.0)   | 77.5 (70.1-85.7)  | 88.0 (79.4-97.5)    |
| December 6-12, 2020               | 68.6 (65.5-71.9)  | 49.0 (42.1-57.1) | 61.4 (52.6-71.7) | 85.1 (76.8-94.3)    | 70.9 (64.9-77.4)   | 62.5 (55.9-69.9)  | 77.3 (69.3-86.2)    |
| December 13-19, 2020              | 56.2 (53.4-59.1)  | 38.1 (32.0-45.3) | 49.6 (41.7-58.9) | 68.2 (60.8-76.5)    | 58.4 (53.0-64.4)   | 53.4 (47.3-60.3)  | 63.4 (56.2-71.5)    |
| December 20-26, 2020              | 38.2 (35.9-40.6)  | 25.6 (20.7-31.6) | 43.1 (35.8-51.8) | 51.8 (45.4-59.1)    | 40.1 (35.7-45.1)   | 34.1 (29.3-39.7)  | 34.2 (29.0-40.3)    |
| December 27, 2020-January 2, 2021 | 35.7 (33.5-38.0)  | 20.2 (16.0-25.7) | 36.9 (30.2-45.1) | 41.9 (36.2-48.5)    | 34.7 (30.6-39.3)   | 39.4 (34.2-45.4)  | 39.5 (33.9-46.1)    |
| January 3-9, 2021                 | 45.7 (43.2-48.4)  | 39.9 (33.7-47.3) | 47.8 (40.1-56.9) | 65.0 (57.8-73.1)    | 46.6 (41.8-51.9)   | 39.0 (33.9-45.0)  | 35.7 (30.4-41.9)    |
| January 10-16, 2021               | 43.3 (40.9-45.9)  | 48.9 (41.9-57.0) | 57.8 (49.3-67.9) | 50.4 (44.1-57.6)    | 44.4 (39.8-49.7)   | 35.2 (30.3-40.8)  | 31.1 (26.2-37.0)    |
| January 17-23, 2021               | 39.6 (37.3-42.1)  | 53.7 (46.4-62.1) | 57.1 (48.6-67.1) | 46.9 (40.8-53.9)    | 37.3 (33.1-42.1)   | 34.6 (29.7-40.2)  | 19.0 (15.2-23.7)    |
| January 24-30, 2021               | 27.8 (25.9-29.9)  | 33.7 (28.0-40.5) | 33.2 (26.9-41.0) | 43.1 (37.3-49.8)    | 25.0 (21.6-29.0)   | 21.1 (17.4-25.6)  | 15.3 (12.0-19.6)    |
| January 31-February 6, 2021       | 18.8 (17.2-20.5)  | 22.4 (17.9-28.1) | 17.0 (12.6-22.8) | 26.8 (22.3-32.2)    | 16.7 (14.0-20.1)   | 12.9 (10.1-16.5)  | 18.5 (14.8-23.2)    |
| February 7-13, 2021               | 21.6 (19.9-23.5)  | 29.6 (24.3-36.0) | 29.7 (23.8-37.2) | 27.8 (23.2-33.3)    | 20.6 (17.5-24.3)   | 15.6 (12.4-19.5)  | 13.6 (10.5-17.7)    |
| February 14-20, 2021              | 19.0 (17.4-20.8)  | 27.8 (22.7-34.0) | 18.9 (14.3-25.1) | 24.5 (20.2-29.7)    | 18.2 (15.3-21.6)   | 13.3 (10.4-17.0)  | 14.1 (10.9-18.3)    |
| February 21-27, 2021              | 13.5 (12.2-15.0)  | 17.6 (13.7-22.8) | 18.6 (14.0-24.6) | 17.4 (13.9-21.9)    | 13.7 (11.2-16.8)   | 8.4 (6.2-11.4)    | 8.3 (5.9-11.6)      |
| February 28-March 6, 2021         | 13.9 (12.6-15.4)  | 14.9 (11.3-19.7) | 14.7 (10.7-20.2) | 20.2 (16.4-25.0)    | 13.6 (11.1-16.6)   | 11.1 (8.5-14.4)   | 9.3 (6.7-12.7)      |
| March 7-13, 2021                  | 19.5 (17.9-21.3)  | 32.9 (27.3-39.6) | 24.0 (18.7-30.8) | 22.5 (18.5-27.5)    | 18.3 (15.4-21.8)   | 15.2 (12.1-19.0)  | 9.5 (7.0-13.0)      |

| <b>Week</b>            | <b>Overall</b>      | <b>&lt;10</b>       | <b>10-17</b>        | <b>18-29</b>        | <b>30-49</b>        | <b>50-64</b>     | <b>≥65</b>       |
|------------------------|---------------------|---------------------|---------------------|---------------------|---------------------|------------------|------------------|
| March 14-20, 2021      | 21.1 (19.4-23.0)    | 33.2 (27.6-40.0)    | 26.7 (21.1-33.8)    | 25.8 (21.4-31.1)    | 23.6 (20.3-27.5)    | 14.3 (11.4-18.1) | 6.6 (4.5-9.6)    |
| March 21-27, 2021      | 18.1 (16.6-19.8)    | 20.6 (16.3-26.1)    | 31.7 (25.6-39.4)    | 26.5 (22.0-31.9)    | 16.0 (13.3-19.3)    | 12.1 (9.4-15.6)  | 10.0 (7.4-13.6)  |
| March 28-April 3, 2021 | 19.0 (17.4-20.7)    | 20.3 (16.0-25.8)    | 31.0 (24.9-38.6)    | 24.6 (20.3-29.8)    | 18.5 (15.5-21.9)    | 14.6 (11.5-18.4) | 10.5 (7.8-14.2)  |
| April 4-10, 2021       | 28.7 (26.7-30.8)    | 27.2 (22.2-33.4)    | 44.2 (36.8-53.1)    | 44.8 (38.8-51.6)    | 27.2 (23.6-31.3)    | 23.6 (19.6-28.3) | 13.0 (9.9-17.0)  |
| April 11-17, 2021      | 35.2 (33.0-37.5)    | 39.5 (33.3-46.8)    | 40.3 (33.3-48.9)    | 53.4 (46.9-60.8)    | 36.9 (32.7-41.7)    | 28.3 (24.0-33.5) | 15.2 (11.8-19.5) |
| April 18-24, 2021      | 54.3 (51.6-57.2)    | 72.2 (63.6-81.9)    | 83.4 (73.0-95.3)    | 68.0 (60.6-76.3)    | 59.0 (53.6-65.0)    | 43.5 (38.0-49.8) | 14.7 (11.4-18.9) |
| April 25-May 1, 2021   | 65.0 (62.0-68.1)    | 84.6 (75.3-95.0)    | 86.6 (76.0-98.8)    | 84.2 (76.0-93.4)    | 77.7 (71.4-84.5)    | 43.6 (38.1-49.8) | 20.1 (16.2-24.9) |
| May 2-8, 2021          | 96.9 (93.2-100.7)   | 129.5 (117.8-142.3) | 112.9 (100.6-126.6) | 137.0 (126.3-148.6) | 116.0 (108.3-124.3) | 66.4 (59.6-74.1) | 24.7 (20.4-30.1) |
| May 9-15, 2021         | 109.1 (105.2-113.2) | 104.8 (94.3-116.4)  | 140.4 (126.7-155.7) | 169.7 (157.7-182.5) | 126.4 (118.3-135.0) | 77.4 (70.0-85.7) | 38.7 (33.1-45.3) |
| May 16-22, 2021        | 105.1 (101.3-109.1) | 105.9 (95.4-117.6)  | 122.4 (109.6-136.8) | 162.9 (151.2-175.5) | 117.4 (109.6-125.8) | 81.9 (74.2-90.4) | 41.2 (35.4-47.9) |
| May 23-29, 2021        | 75.3 (72.0-78.7)    | 78.3 (69.3-88.4)    | 94.8 (83.6-107.6)   | 115.4 (105.6-126.1) | 83.0 (76.4-90.0)    | 52.0 (46.0-58.9) | 34.9 (29.6-41.1) |

**Supplementary Table 18 Weekly incidence rates of COVID-19 per 1,000 person-years (95% confidence interval) according to income quintile**

| Week                              | Overall           | Q1 (lowest)         | Q2                 | Q3               | Q4                 | Q5 (highest)     |
|-----------------------------------|-------------------|---------------------|--------------------|------------------|--------------------|------------------|
| March 8-14, 2020                  | 0.6 (0.3-0.9)     | 0.2 (0.0-1.4)       | 0.4 (0.1-1.5)      | 1.0 (0.4-2.3)    | 0.6 (0.2-1.8)      | 0.8 (0.3-2.1)    |
| March 15-21, 2020                 | 1.5 (1.1-2.1)     | 0.8 (0.3-2.1)       | 0.4 (0.1-1.5)      | 1.0 (0.4-2.3)    | 2.7 (1.6-4.6)      | 2.7 (1.6-4.6)    |
| March 22-28, 2020                 | 3.9 (3.2-4.7)     | 1.8 (0.9-3.4)       | 2.1 (1.2-3.8)      | 2.9 (1.8-4.8)    | 5.4 (3.7-7.8)      | 7.7 (5.7-10.5)   |
| March 29-April 4, 2020            | 1.9 (1.5-2.5)     | 1.4 (0.7-2.9)       | 1.2 (0.5-2.6)      | 1.4 (0.6-2.8)    | 2.1 (1.2-3.8)      | 3.5 (2.2-5.5)    |
| April 5-11, 2020                  | 0.8 (0.5-1.2)     | 0.8 (0.3-2.1)       | 0.2 (0.0-1.4)      | 1.7 (0.9-3.4)    | 0.6 (0.2-1.8)      | 0.8 (0.3-2.1)    |
| April 12-18, 2020                 | 0.5 (0.3-0.8)     | 0.6 (0.2-1.8)       | 0.8 (0.3-2.1)      | 0.4 (0.1-1.6)    | 0.6 (0.2-1.8)      | 0.2 (0.0-1.4)    |
| April 19-25, 2020                 | 0.6 (0.3-0.9)     | 1.0 (0.4-2.4)       | 0.2 (0.0-1.4)      | 1.4 (0.6-2.8)    | 0.0 (0.0-0.8)      | 0.4 (0.1-1.5)    |
| April 26-May 2, 2020              | 0.3 (0.2-0.6)     | 0.8 (0.3-2.1)       | 0.2 (0.0-1.4)      | 0.4 (0.1-1.5)    | 0.2 (0.0-1.4)      | 0.0 (0.0-0.8)    |
| May 3-9, 2020                     | 0.2 (0.1-0.5)     | 0.0 (0.0-0.8)       | 0.0 (0.0-0.8)      | 0.8 (0.3-2.1)    | 0.4 (0.1-1.5)      | 0.0 (0.0-0.8)    |
| May 10-16, 2020                   | 0.0 (0.0-0.3)     | 0.0 (0.0-0.8)       | 0.2 (0.0-1.4)      | 0.0 (0.0-0.8)    | 0.0 (0.0-0.8)      | 0.0 (0.0-0.8)    |
| May 17-23, 2020                   | 0.1 (0.0-0.3)     | 0.0 (0.0-0.8)       | 0.4 (0.1-1.5)      | 0.0 (0.0-0.8)    | 0.0 (0.0-0.8)      | 0.0 (0.0-0.8)    |
| May 24-30, 2020                   | 0.2 (0.1-0.5)     | 0.0 (0.0-0.8)       | 0.8 (0.3-2.0)      | 0.4 (0.1-1.5)    | 0.0 (0.0-0.8)      | 0.0 (0.0-0.8)    |
| May 31-June 6, 2020               | 0.1 (0.0-0.3)     | 0.0 (0.0-0.9)       | 0.0 (0.0-0.8)      | 0.2 (0.0-1.4)    | 0.0 (0.0-0.8)      | 0.2 (0.0-1.4)    |
| June 7-13, 2020                   | 0.2 (0.1-0.5)     | 0.0 (0.0-0.8)       | 0.4 (0.1-1.5)      | 0.0 (0.0-0.8)    | 0.2 (0.0-1.4)      | 0.4 (0.1-1.6)    |
| June 14-20, 2020                  | 0.3 (0.1-0.6)     | 0.2 (0.0-1.4)       | 0.0 (0.0-0.8)      | 0.2 (0.0-1.4)    | 0.6 (0.2-1.8)      | 0.4 (0.1-1.6)    |
| June 21-27, 2020                  | 0.3 (0.2-0.6)     | 0.4 (0.1-1.6)       | 0.0 (0.0-0.8)      | 0.6 (0.2-1.8)    | 0.6 (0.2-1.8)      | 0.2 (0.0-1.4)    |
| June 28-July 4, 2020              | 0.0 (0.0-0.2)     | 0.0 (0.0-0.8)       | 0.0 (0.0-0.8)      | 0.0 (0.0-0.8)    | 0.0 (0.0-0.8)      | 0.0 (0.0-0.8)    |
| July 5-11, 2020                   | 0.1 (0.1-0.4)     | 0.0 (0.0-0.8)       | 0.2 (0.0-1.4)      | 0.2 (0.0-1.4)    | 0.2 (0.0-1.4)      | 0.0 (0.0-0.8)    |
| July 12-18, 2020                  | 1.6 (1.2-2.2)     | 0.2 (0.0-1.4)       | 1.7 (0.9-3.3)      | 1.0 (0.4-2.3)    | 0.4 (0.1-1.5)      | 1.0 (0.4-2.3)    |
| July 19-25, 2020                  | 0.9 (0.6-1.3)     | 1.2 (0.5-2.6)       | 1.5 (0.8-3.1)      | 1.0 (0.4-2.3)    | 0.6 (0.2-1.8)      | 0.4 (0.1-1.6)    |
| July 26-August 1, 2020            | 1.4 (1.0-1.9)     | 1.0 (0.4-2.4)       | 3.1 (1.9-5.0)      | 1.0 (0.4-2.3)    | 1.9 (1.0-3.6)      | 0.0 (0.0-0.8)    |
| August 2-8, 2020                  | 4.5 (3.7-5.3)     | 3.9 (2.5-6.1)       | 9.0 (6.8-12.0)     | 2.5 (1.5-4.3)    | 3.1 (1.9-5.0)      | 4.5 (3.0-6.7)    |
| August 9-15, 2020                 | 7.0 (6.0-8.0)     | 7.6 (5.6-10.5)      | 7.7 (5.6-10.5)     | 4.8 (3.3-7.2)    | 5.8 (4.0-8.3)      | 8.7 (6.5-11.7)   |
| August 16-22, 2020                | 10.2 (9.0-11.5)   | 5.9 (4.1-8.4)       | 5.0 (3.4-7.3)      | 11.6 (9.0-15.0)  | 19.7 (16.2-23.9)   | 9.3 (7.0-12.4)   |
| August 23-29, 2020                | 6.2 (5.4-7.3)     | 5.9 (4.1-8.4)       | 5.4 (3.7-7.8)      | 7.4 (5.4-10.1)   | 7.1 (5.2-9.9)      | 5.1 (3.4-7.4)    |
| August 30-September 5, 2020       | 4.2 (3.5-5.0)     | 7.1 (5.1-9.8)       | 2.9 (1.7-4.8)      | 2.5 (1.5-4.3)    | 4.6 (3.1-6.9)      | 4.3 (2.8-6.5)    |
| September 6-12, 2020              | 4.1 (3.4-5.0)     | 6.9 (4.9-9.6)       | 6.3 (4.5-8.9)      | 2.1 (1.2-3.8)    | 4.1 (2.6-6.2)      | 1.6 (0.8-3.1)    |
| September 13-19, 2020             | 9.3 (8.2-10.5)    | 10.8 (8.3-14.0)     | 8.3 (6.1-11.1)     | 5.8 (4.1-8.3)    | 8.1 (6.0-11.0)     | 12.8 (10.1-16.3) |
| September 20-26, 2020             | 9.3 (8.2-10.5)    | 14.3 (11.4-18.0)    | 9.0 (6.8-12.0)     | 7.5 (5.5-10.3)   | 6.4 (4.5-9.0)      | 9.3 (7.0-12.4)   |
| September 27-October 3, 2020      | 12.7 (11.5-14.2)  | 22.7 (18.9-27.3)    | 8.6 (6.5-11.6)     | 8.3 (6.2-11.2)   | 10.4 (8.0-13.6)    | 10.5 (8.0-13.7)  |
| October 4-10, 2020                | 20.3 (18.7-22.1)  | 33.3 (28.7-38.7)    | 17.5 (14.2-21.5)   | 15.7 (12.6-19.5) | 17.2 (13.9-21.1)   | 14.2 (11.3-17.8) |
| October 11-17, 2020               | 25.9 (24.1-27.9)  | 38.4 (33.4-44.2)    | 24.6 (20.7-29.2)   | 18.4 (15.0-22.5) | 23.0 (19.2-27.5)   | 22.5 (18.8-27.0) |
| October 18-24, 2020               | 51.1 (48.5-53.9)  | 71.0 (64.0-78.7)    | 46.1 (40.6-52.3)   | 45.9 (40.4-52.1) | 42.8 (37.6-48.9)   | 39.0 (34.0-44.8) |
| October 25-31, 2020               | 69.9 (66.8-73.1)  | 102.5 (94.1-111.7)  | 55.4 (49.3-62.2)   | 60.3 (53.9-67.3) | 66.4 (59.8-73.8)   | 62.0 (55.6-69.2) |
| November 1-7, 2020                | 86.9 (83.4-90.5)  | 108.3 (99.7-117.8)  | 73.1 (66.1-80.9)   | 79.3 (72.0-87.4) | 90.9 (83.0-99.5)   | 77.2 (70.0-85.2) |
| November 8-14, 2020               | 93.6 (90.0-97.4)  | 103.8 (95.3-113.0)  | 99.2 (91.0-108.2)  | 82.3 (74.8-90.5) | 104.5 (96.1-113.7) | 64.9 (58.3-72.2) |
| November 15-21, 2020              | 99.1 (95.4-102.9) | 130.7 (121.1-141.1) | 103.4 (95.0-112.6) | 83.4 (75.9-91.7) | 99.3 (91.0-108.3)  | 67.1 (60.3-74.5) |
| November 22-28, 2020              | 85.8 (82.4-89.4)  | 127.4 (117.9-137.6) | 84.2 (76.7-92.5)   | 68.9 (62.1-76.4) | 84.5 (76.9-92.8)   | 50.7 (44.9-57.3) |
| November 29-December 5, 2020      | 81.1 (77.7-84.6)  | 146.8 (136.6-157.8) | 82.9 (75.4-91.1)   | 63.1 (56.5-70.3) | 59.9 (53.6-67.0)   | 40.8 (35.6-46.7) |
| December 6-12, 2020               | 68.6 (65.5-71.9)  | 132.5 (122.8-143.0) | 69.8 (62.9-77.4)   | 39.9 (34.8-45.7) | 46.0 (40.5-52.2)   | 40.6 (35.4-46.5) |
| December 13-19, 2020              | 56.2 (53.4-59.1)  | 97.0 (88.7-106.1)   | 63.2 (56.7-70.5)   | 37.0 (32.0-42.6) | 44.4 (39.0-50.6)   | 35.5 (30.7-41.1) |
| December 20-26, 2020              | 38.2 (35.9-40.6)  | 63.6 (57.0-71.0)    | 39.7 (34.6-45.6)   | 30.7 (26.3-35.9) | 29.8 (25.5-34.9)   | 23.9 (20.1-28.6) |
| December 27, 2020-January 2, 2021 | 35.7 (33.5-38.0)  | 54.6 (48.5-61.5)    | 37.6 (32.7-43.3)   | 28.6 (24.3-33.6) | 27.1 (23.0-32.0)   | 24.1 (20.2-28.8) |
| January 3-9, 2021                 | 45.7 (43.2-48.4)  | 72.6 (65.4-80.4)    | 45.2 (39.8-51.4)   | 29.9 (25.6-35.1) | 52.5 (46.6-59.1)   | 25.3 (21.3-30.1) |
| January 10-16, 2021               | 43.3 (40.9-45.9)  | 95.4 (87.2-104.3)   | 48.0 (42.3-54.4)   | 19.2 (15.7-23.4) | 31.6 (27.1-36.9)   | 24.0 (20.1-28.6) |
| January 17-23, 2021               | 39.6 (37.3-42.1)  | 94.3 (86.1-103.2)   | 46.6 (41.1-52.9)   | 18.2 (14.9-22.3) | 18.0 (14.6-22.0)   | 24.2 (20.2-28.8) |
| January 24-30, 2021               | 27.8 (25.9-29.9)  | 69.2 (62.2-76.9)    | 27.9 (23.7-32.9)   | 11.9 (9.3-15.3)  | 15.8 (12.7-19.7)   | 16.3 (13.1-20.2) |
| January 31-February 6, 2021       | 18.8 (17.2-20.5)  | 35.1 (30.3-40.7)    | 18.1 (14.8-22.2)   | 12.3 (9.6-15.8)  | 11.9 (9.3-15.3)    | 18.3 (14.9-22.4) |
| February 7-13, 2021               | 21.6 (19.9-23.5)  | 45.2 (39.6-51.5)    | 18.1 (14.8-22.2)   | 12.9 (10.1-16.4) | 11.7 (9.1-15.1)    | 22.4 (18.6-26.9) |
| February 14-20, 2021              | 19.0 (17.4-20.8)  | 43.6 (38.1-49.8)    | 14.4 (11.5-18.1)   | 11.9 (9.3-15.3)  | 10.3 (7.9-13.5)    | 14.1 (11.2-17.8) |
| February 21-27, 2021              | 13.5 (12.2-15.0)  | 29.5 (25.1-34.7)    | 13.9 (11.0-17.5)   | 7.6 (5.6-10.4)   | 6.6 (4.7-9.3)      | 11.6 (9.0-15.0)  |
| February 28-March 6, 2021         | 13.9 (12.6-15.4)  | 38.8 (33.6-44.6)    | 14.0 (11.1-17.7)   | 6.3 (4.4-8.8)    | 6.2 (4.4-8.8)      | 6.7 (4.8-9.3)    |
| March 7-13, 2021                  | 19.5 (17.9-21.3)  | 52.5 (46.5-59.3)    | 17.0 (13.8-20.9)   | 8.4 (6.2-11.3)   | 14.6 (11.7-18.3)   | 9.0 (6.8-12.1)   |
| March 14-20, 2021                 | 21.1 (19.4-23.0)  | 58.0 (51.6-65.1)    | 10.1 (7.7-13.3)    | 14.3 (11.3-17.9) | 14.8 (11.8-18.5)   | 11.0 (8.5-14.3)  |
| March 21-27, 2021                 | 18.1 (16.6-19.8)  | 39.2 (34.1-45.1)    | 17.0 (13.8-20.9)   | 10.7 (8.3-14.0)  | 13.1 (10.3-16.6)   | 11.6 (9.0-15.0)  |
| March 28-April 3, 2021            | 19.0 (17.4-20.7)  | 40.6 (35.4-46.6)    | 15.8 (12.7-19.6)   | 11.5 (8.9-14.9)  | 17.5 (14.3-21.6)   | 11.4 (8.8-14.7)  |

| <b>Week</b>          | <b>Overall</b>      | <b>Q1 (lowest)</b>  | <b>Q2</b>           | <b>Q3</b>          | <b>Q4</b>        | <b>Q5 (highest)</b> |
|----------------------|---------------------|---------------------|---------------------|--------------------|------------------|---------------------|
| April 4-10, 2021     | 28.7 (26.7-30.8)    | 39.0 (33.9-44.9)    | 31.0 (26.5-36.2)    | 25.2 (21.2-29.9)   | 28.6 (24.4-33.7) | 19.8 (16.3-24.1)    |
| April 11-17, 2021    | 35.2 (33.0-37.5)    | 56.2 (50.0-63.2)    | 31.2 (26.7-36.4)    | 31.2 (26.8-36.5)   | 34.1 (29.4-39.6) | 26.3 (22.2-31.2)    |
| April 18-24, 2021    | 54.3 (51.6-57.2)    | 76.1 (68.8-84.2)    | 51.9 (46.0-58.5)    | 50.8 (45.0-57.4)   | 48.4 (42.7-54.8) | 44.6 (39.1-50.8)    |
| April 25-May 1, 2021 | 65.0 (62.0-68.1)    | 93.8 (85.6-102.8)   | 65.4 (58.8-72.8)    | 64.9 (58.3-72.3)   | 58.1 (51.9-65.1) | 45.2 (39.7-51.4)    |
| May 2-8, 2021        | 96.9 (93.2-100.7)   | 138.9 (128.8-149.7) | 112.8 (104.0-122.4) | 92.0 (84.1-100.7)  | 70.7 (63.8-78.4) | 67.7 (60.9-75.2)    |
| May 9-15, 2021       | 109.1 (105.2-113.2) | 148.4 (138.0-159.5) | 133.4 (123.8-143.8) | 104.9 (96.4-114.2) | 86.7 (79.0-95.1) | 71.3 (64.3-79.0)    |
| May 16-22, 2021      | 105.1 (101.3-109.1) | 171.3 (160.0-183.2) | 122.0 (112.8-132.0) | 94.1 (86.1-102.9)  | 76.4 (69.2-84.4) | 62.5 (56.0-69.8)    |
| May 23-29, 2021      | 75.3 (72.0-78.7)    | 121.2 (111.8-131.3) | 89.4 (81.5-98.0)    | 62.4 (55.9-69.6)   | 62.6 (56.1-69.8) | 41.9 (36.6-47.9)    |

**Supplementary Table 19 Weekly incidence rates of COVID-19 per 1,000 person-years (95% confidence interval) according to region**

| Week                              | Overall           | Interlake-Eastern | Northern            | Southern            | Prairie Mountain | Winnipeg          |
|-----------------------------------|-------------------|-------------------|---------------------|---------------------|------------------|-------------------|
| March 8-14, 2020                  | 0.6 (0.3-0.9)     | 0.4 (0.1-2.8)     | 0.0 (0.0-2.9)       | 0.5 (0.1-2.0)       | 0.0 (0.0-1.3)    | 0.8 (0.5-1.4)     |
| March 15-21, 2020                 | 1.5 (1.1-2.1)     | 0.4 (0.1-2.8)     | 0.0 (0.0-2.9)       | 0.5 (0.1-2.0)       | 1.5 (0.6-3.6)    | 2.2 (1.6-3.1)     |
| March 22-28, 2020                 | 3.9 (3.2-4.7)     | 2.0 (0.8-4.7)     | 1.3 (0.3-5.4)       | 2.7 (1.5-4.9)       | 0.6 (0.2-2.4)    | 5.5 (4.4-6.8)     |
| March 29-April 4, 2020            | 1.9 (1.5-2.5)     | 2.8 (1.3-5.8)     | 0.7 (0.1-4.8)       | 1.2 (0.5-3.0)       | 0.3 (0.0-2.1)    | 2.4 (1.8-3.4)     |
| April 5-11, 2020                  | 0.8 (0.5-1.2)     | 1.6 (0.6-4.2)     | 0.0 (0.0-2.9)       | 0.5 (0.1-2.0)       | 0.3 (0.0-2.1)    | 0.9 (0.5-1.6)     |
| April 12-18, 2020                 | 0.5 (0.3-0.8)     | 0.0 (0.0-1.7)     | 0.0 (0.0-2.9)       | 0.2 (0.0-1.8)       | 0.3 (0.0-2.1)    | 0.7 (0.4-1.3)     |
| April 19-25, 2020                 | 0.6 (0.3-0.9)     | 0.4 (0.1-2.8)     | 0.0 (0.0-2.9)       | 0.5 (0.1-2.0)       | 0.6 (0.2-2.4)    | 0.7 (0.4-1.2)     |
| April 26-May 2, 2020              | 0.3 (0.2-0.6)     | 0.0 (0.0-1.7)     | 0.0 (0.0-2.9)       | 0.0 (0.0-1.1)       | 1.8 (0.8-4.0)    | 0.1 (0.0-0.5)     |
| May 3-9, 2020                     | 0.2 (0.1-0.5)     | 0.0 (0.0-1.7)     | 0.0 (0.0-2.9)       | 0.0 (0.0-1.1)       | 1.5 (0.6-3.6)    | 0.1 (0.0-0.5)     |
| May 10-16, 2020                   | 0.0 (0.0-0.3)     | 0.0 (0.0-1.7)     | 0.0 (0.0-2.9)       | 0.0 (0.0-1.1)       | 0.0 (0.0-1.3)    | 0.1 (0.0-0.5)     |
| May 17-23, 2020                   | 0.1 (0.0-0.3)     | 0.0 (0.0-1.7)     | 0.0 (0.0-2.9)       | 0.0 (0.0-1.1)       | 0.0 (0.0-1.3)    | 0.1 (0.0-0.5)     |
| May 24-30, 2020                   | 0.2 (0.1-0.5)     | 0.0 (0.0-1.7)     | 0.0 (0.0-2.9)       | 1.0 (0.4-2.6)       | 0.0 (0.0-1.3)    | 0.1 (0.0-0.5)     |
| May 31-June 6, 2020               | 0.1 (0.0-0.3)     | 0.0 (0.0-1.7)     | 0.0 (0.0-2.9)       | 0.0 (0.0-1.1)       | 0.0 (0.0-1.3)    | 0.1 (0.0-0.5)     |
| June 7-13, 2020                   | 0.2 (0.1-0.5)     | 0.0 (0.0-1.7)     | 0.0 (0.0-2.9)       | 0.0 (0.0-1.1)       | 0.0 (0.0-1.3)    | 0.4 (0.2-0.9)     |
| June 14-20, 2020                  | 0.3 (0.1-0.6)     | 0.0 (0.0-1.7)     | 0.0 (0.0-2.9)       | 0.5 (0.1-2.0)       | 0.0 (0.0-1.3)    | 0.3 (0.1-0.8)     |
| June 21-27, 2020                  | 0.3 (0.2-0.6)     | 0.0 (0.0-1.7)     | 0.0 (0.0-2.9)       | 0.5 (0.1-2.0)       | 0.0 (0.0-1.3)    | 0.5 (0.2-1.0)     |
| June 28-July 4, 2020              | 0.0 (0.0-0.2)     | 0.0 (0.0-1.7)     | 0.0 (0.0-2.9)       | 0.0 (0.0-1.1)       | 0.0 (0.0-1.3)    | 0.0 (0.0-0.3)     |
| July 5-11, 2020                   | 0.1 (0.1-0.4)     | 0.4 (0.1-2.8)     | 0.0 (0.0-2.9)       | 0.5 (0.1-2.0)       | 0.0 (0.0-1.3)    | 0.1 (0.0-0.5)     |
| July 12-18, 2020                  | 1.6 (1.2-2.2)     | 10.2 (6.9-14.9)   | 0.0 (0.0-2.9)       | 1.7 (0.8-3.6)       | 1.8 (0.8-4.0)    | 0.3 (0.1-0.8)     |
| July 19-25, 2020                  | 0.9 (0.6-1.3)     | 2.7 (1.3-5.7)     | 0.0 (0.0-2.9)       | 2.0 (1.0-3.9)       | 1.5 (0.6-3.6)    | 0.3 (0.1-0.7)     |
| July 26-August 1, 2020            | 1.4 (1.0-1.9)     | 1.6 (0.6-4.2)     | 0.0 (0.0-2.9)       | 2.7 (1.5-4.9)       | 5.1 (3.2-8.2)    | 0.3 (0.1-0.8)     |
| August 2-8, 2020                  | 4.5 (3.7-5.3)     | 0.8 (0.2-3.1)     | 0.0 (0.0-2.9)       | 8.4 (6.0-11.7)      | 20.5 (16.1-26.0) | 1.0 (0.6-1.6)     |
| August 9-15, 2020                 | 7.0 (6.0-8.0)     | 0.4 (0.1-2.8)     | 0.0 (0.0-2.9)       | 12.8 (9.7-16.8)     | 27.1 (22.0-33.3) | 2.8 (2.1-3.8)     |
| August 16-22, 2020                | 10.2 (9.0-11.5)   | 2.7 (1.3-5.7)     | 0.7 (0.1-4.7)       | 19.2 (15.3-23.9)    | 44.3 (37.7-52.0) | 2.5 (1.8-3.4)     |
| August 23-29, 2020                | 6.2 (5.4-7.3)     | 2.3 (1.1-5.2)     | 0.0 (0.0-2.9)       | 6.9 (4.7-10.0)      | 21.7 (17.2-27.3) | 4.0 (3.1-5.2)     |
| August 30-September 5, 2020       | 4.2 (3.5-5.0)     | 3.5 (1.8-6.8)     | 0.0 (0.0-2.9)       | 4.2 (2.6-6.7)       | 6.0 (3.9-9.3)    | 4.3 (3.4-5.5)     |
| September 6-12, 2020              | 4.1 (3.4-5.0)     | 3.9 (2.1-7.3)     | 2.0 (0.6-6.2)       | 4.2 (2.6-6.7)       | 3.0 (1.6-5.6)    | 4.7 (3.7-5.9)     |
| September 13-19, 2020             | 9.3 (8.2-10.5)    | 5.9 (3.5-9.7)     | 1.3 (0.3-5.3)       | 5.4 (3.6-8.2)       | 4.5 (2.7-7.5)    | 12.4 (10.8-14.4)  |
| September 20-26, 2020             | 9.3 (8.2-10.5)    | 9.4 (6.3-14.0)    | 8.0 (4.5-14.1)      | 4.4 (2.8-7.0)       | 3.3 (1.8-6.0)    | 11.8 (10.2-13.6)  |
| September 27-October 3, 2020      | 12.7 (11.5-14.2)  | 20.3 (15.5-26.7)  | 1.3 (0.3-5.3)       | 4.4 (2.8-7.0)       | 1.8 (0.8-4.0)    | 16.7 (14.8-18.9)  |
| October 4-10, 2020                | 20.3 (18.7-22.1)  | 15.6 (11.5-21.3)  | 6.0 (3.1-11.5)      | 14.2 (11.0-18.4)    | 4.5 (2.7-7.5)    | 26.4 (23.9-29.1)  |
| October 11-17, 2020               | 25.9 (24.1-27.9)  | 20.3 (15.5-26.7)  | 26.7 (19.5-36.3)    | 17.4 (13.8-22.0)    | 6.0 (3.9-9.3)    | 32.8 (30.0-35.8)  |
| October 18-24, 2020               | 51.1 (48.5-53.9)  | 50.5 (42.5-60.0)  | 56.7 (45.8-70.1)    | 41.5 (35.7-48.2)    | 9.9 (7.1-14.0)   | 61.4 (57.6-65.5)  |
| October 25-31, 2020               | 69.9 (66.8-73.1)  | 71.3 (61.6-82.4)  | 87.4 (73.6-103.7)   | 66.5 (59.1-74.9)    | 21.7 (17.2-27.3) | 78.9 (74.6-83.5)  |
| November 1-7, 2020                | 86.9 (83.4-90.5)  | 61.5 (52.6-72.0)  | 120.3 (103.9-139.2) | 115.2 (105.2-126.1) | 28.6 (23.4-35.0) | 92.8 (88.0-97.7)  |
| November 8-14, 2020               | 93.6 (90.0-97.4)  | 52.2 (44.0-61.8)  | 136.5 (119.0-156.6) | 156.1 (144.4-168.7) | 28.9 (23.7-35.3) | 92.6 (87.9-97.6)  |
| November 15-21, 2020              | 99.1 (95.4-102.9) | 58.9 (50.2-69.1)  | 142.3 (124.3-162.7) | 157.0 (145.3-169.7) | 39.2 (33.0-46.5) | 98.6 (93.7-103.7) |
| November 22-28, 2020              | 85.8 (82.4-89.4)  | 56.2 (47.7-66.2)  | 159.4 (140.3-181.0) | 102.9 (93.5-113.3)  | 28.7 (23.4-35.0) | 90.3 (85.6-95.2)  |
| November 29-December 5, 2020      | 81.1 (77.7-84.6)  | 63.8 (54.7-74.4)  | 206.6 (184.6-231.1) | 63.7 (56.4-72.0)    | 39.2 (33.0-46.6) | 84.2 (79.7-88.9)  |
| December 6-12, 2020               | 68.6 (65.5-71.9)  | 70.1 (60.5-81.2)  | 188.4 (167.4-211.9) | 52.1 (45.5-59.6)    | 40.1 (33.9-47.6) | 65.7 (61.7-69.9)  |
| December 13-19, 2020              | 56.2 (53.4-59.1)  | 48.6 (40.8-58.0)  | 194.4 (173.1-218.4) | 55.4 (48.6-63.1)    | 28.7 (23.5-35.1) | 49.6 (46.2-53.3)  |
| December 20-26, 2020              | 38.2 (35.9-40.6)  | 35.7 (29.1-43.8)  | 115.6 (99.4-134.4)  | 39.1 (33.4-45.7)    | 15.1 (11.4-19.9) | 35.4 (32.5-38.6)  |
| December 27, 2020-January 2, 2021 | 35.7 (33.5-38.0)  | 25.1 (19.7-32.1)  | 109.6 (93.8-127.9)  | 26.0 (21.4-31.4)    | 15.4 (11.7-20.3) | 36.0 (33.1-39.2)  |
| January 3-9, 2021                 | 45.7 (43.2-48.4)  | 25.5 (20.0-32.5)  | 269.8 (244.4-297.8) | 22.5 (18.3-27.6)    | 45.6 (38.9-53.5) | 32.3 (29.5-35.3)  |
| January 10-16, 2021               | 43.3 (40.9-45.9)  | 27.9 (22.1-35.2)  | 362.4 (332.7-394.8) | 16.3 (12.8-20.8)    | 20.5 (16.2-26.1) | 27.2 (24.7-30.0)  |
| January 17-23, 2021               | 39.6 (37.3-42.1)  | 47.5 (39.8-56.8)  | 327.2 (299.0-358.2) | 13.9 (10.7-18.0)    | 26.6 (21.6-32.8) | 20.0 (17.9-22.4)  |
| January 24-30, 2021               | 27.8 (25.9-29.9)  | 51.5 (43.4-61.1)  | 218.4 (195.5-244.0) | 11.4 (8.5-15.2)     | 16.6 (12.8-21.7) | 12.1 (10.4-13.9)  |
| January 31-February 6, 2021       | 18.8 (17.2-20.5)  | 16.5 (12.2-22.3)  | 130.2 (112.7-150.3) | 11.6 (8.7-15.5)     | 10.9 (7.8-15.1)  | 12.0 (10.4-13.9)  |
| February 7-13, 2021               | 21.6 (19.9-23.5)  | 11.4 (7.9-16.4)   | 194.9 (173.3-219.3) | 13.4 (10.2-17.4)    | 5.7 (3.7-9.0)    | 12.6 (10.9-14.5)  |
| February 14-20, 2021              | 19.0 (17.4-20.8)  | 10.6 (7.3-15.5)   | 161.8 (142.2-184.2) | 5.2 (3.4-8.0)       | 0.9 (0.3-2.8)    | 14.6 (12.8-16.6)  |
| February 21-27, 2021              | 13.5 (12.2-15.0)  | 8.7 (5.7-13.1)    | 114.2 (97.9-133.3)  | 4.4 (2.8-7.1)       | 0.9 (0.3-2.8)    | 10.0 (8.6-11.8)   |
| February 28-March 6, 2021         | 13.9 (12.6-15.4)  | 5.5 (3.3-9.3)     | 146.9 (128.3-168.3) | 5.7 (3.8-8.6)       | 2.7 (1.4-5.2)    | 7.5 (6.2-9.0)     |
| March 7-13, 2021                  | 19.5 (17.9-21.3)  | 5.1 (3.0-8.8)     | 195.5 (173.8-220.0) | 8.4 (6.0-11.8)      | 6.3 (4.1-9.7)    | 11.4 (9.9-13.3)   |
| March 14-20, 2021                 | 21.1 (19.4-23.0)  | 4.7 (2.7-8.3)     | 155.6 (136.3-177.6) | 9.6 (7.0-13.2)      | 12.4 (9.1-16.8)  | 16.3 (14.4-18.5)  |
| March 21-27, 2021                 | 18.1 (16.6-19.8)  | 4.3 (2.4-7.8)     | 135.3 (117.4-156.0) | 7.4 (5.2-10.6)      | 6.3 (4.1-9.7)    | 15.1 (13.2-17.2)  |
| March 28-April 3, 2021            | 19.0 (17.4-20.7)  | 2.4 (1.1-5.2)     | 155.6 (136.2-177.6) | 4.2 (2.6-6.8)       | 14.5 (10.9-19.2) | 13.9 (12.1-15.9)  |



| <b>Week</b>          | <b>Overall</b>      | <b>Interlake-Eastern</b> | <b>Northern</b>     | <b>Southern</b>  | <b>Prairie Mountain</b> | <b>Winnipeg</b>     |
|----------------------|---------------------|--------------------------|---------------------|------------------|-------------------------|---------------------|
| April 4-10, 2021     | 28.7 (26.7-30.8)    | 7.5 (4.8-11.7)           | 167.4 (147.3-190.3) | 10.9 (8.1-14.6)  | 16.3 (12.5-21.3)        | 26.9 (24.4-29.7)    |
| April 11-17, 2021    | 35.2 (33.0-37.5)    | 27.5 (21.8-34.8)         | 124.1 (106.9-144.0) | 18.0 (14.3-22.7) | 25.6 (20.7-31.7)        | 35.2 (32.3-38.3)    |
| April 18-24, 2021    | 54.3 (51.6-57.2)    | 34.2 (27.7-42.2)         | 82.7 (68.9-99.2)    | 30.9 (25.9-36.8) | 45.6 (38.8-53.4)        | 63.7 (59.8-67.8)    |
| April 25-May 1, 2021 | 65.0 (62.0-68.1)    | 39.7 (32.7-48.3)         | 56.1 (45.0-70.1)    | 32.1 (27.0-38.1) | 60.4 (52.6-69.4)        | 80.0 (75.6-84.6)    |
| May 2-8, 2021        | 96.9 (93.2-100.7)   | 54.3 (46.0-64.2)         | 76.4 (63.1-92.4)    | 54.1 (47.4-61.8) | 60.2 (52.4-69.1)        | 124.9 (119.4-130.7) |
| May 9-15, 2021       | 109.1 (105.2-113.2) | 93.4 (82.2-106.1)        | 97.4 (82.3-115.3)   | 86.3 (77.7-95.9) | 55.4 (47.9-64.0)        | 130.1 (124.4-136.0) |
| May 16-22, 2021      | 105.1 (101.3-109.1) | 67.5 (58.1-78.4)         | 106.3 (90.4-124.9)  | 86.2 (77.6-95.8) | 59.4 (51.6-68.3)        | 126.0 (120.4-131.8) |
| May 23-29, 2021      | 75.3 (72.0-78.7)    | 53.7 (45.4-63.6)         | 70.3 (57.6-85.7)    | 66.3 (58.8-74.7) | 47.6 (40.7-55.7)        | 87.6 (83.0-92.5)    |

**Supplementary Table 20 Weekly test positivity (%) for COVID-19 (95% confidence interval) according to gender**

| <b>Week</b>                       | <b>Overall</b>   | <b>Male</b>      | <b>Female</b>    |
|-----------------------------------|------------------|------------------|------------------|
| March 8-14, 2020                  | 0.4 (0.2-0.8)    | 0.6 (0.3-1.3)    | 0.3 (0.1-0.8)    |
| March 15-21, 2020                 | 1.0 (0.7-1.4)    | 1.3 (0.8-2.0)    | 0.8 (0.5-1.3)    |
| March 22-28, 2020                 | 3.2 (2.6-4.0)    | 3.4 (2.5-4.7)    | 3.1 (2.4-4.1)    |
| March 29-April 4, 2020            | 1.2 (0.9-1.6)    | 2.3 (1.6-3.4)    | 0.8 (0.5-1.2)    |
| April 5-11, 2020                  | 0.7 (0.5-1.1)    | 1.4 (0.8-2.4)    | 0.4 (0.2-0.9)    |
| April 12-18, 2020                 | 0.6 (0.3-1.0)    | 0.5 (0.2-1.2)    | 0.7 (0.3-1.3)    |
| April 19-25, 2020                 | 0.5 (0.3-0.9)    | 0.5 (0.2-1.1)    | 0.5 (0.3-1.0)    |
| April 26-May 2, 2020              | 0.2 (0.1-0.4)    | 0.3 (0.1-0.7)    | 0.1 (0.0-0.4)    |
| May 3-9, 2020                     | 0.2 (0.1-0.4)    | 0.2 (0.1-0.7)    | 0.2 (0.1-0.5)    |
| May 10-16, 2020                   | 0.0 (0.0-0.2)    | 0.1 (0.0-0.5)    | 0.0 (0.0-0.2)    |
| May 17-23, 2020                   | 0.1 (0.0-0.2)    | 0.1 (0.0-0.4)    | 0.0 (0.0-0.3)    |
| May 24-30, 2020                   | 0.1 (0.1-0.3)    | 0.3 (0.1-0.6)    | 0.0 (0.0-0.1)    |
| May 31-June 6, 2020               | 0.0 (0.0-0.2)    | 0.1 (0.0-0.4)    | 0.0 (0.0-0.2)    |
| June 7-13, 2020                   | 0.1 (0.1-0.3)    | 0.3 (0.1-0.7)    | 0.0 (0.0-0.2)    |
| June 14-20, 2020                  | 0.2 (0.1-0.4)    | 0.3 (0.1-0.7)    | 0.2 (0.1-0.5)    |
| June 21-27, 2020                  | 0.2 (0.1-0.4)    | 0.3 (0.2-0.7)    | 0.1 (0.0-0.4)    |
| June 28-July 4, 2020              | 0.0 (0.0-0.1)    | 0.0 (0.0-0.3)    | 0.0 (0.0-0.2)    |
| July 5-11, 2020                   | 0.1 (0.0-0.3)    | 0.1 (0.0-0.4)    | 0.1 (0.0-0.4)    |
| July 12-18, 2020                  | 0.8 (0.6-1.1)    | 0.6 (0.3-1.0)    | 1.0 (0.7-1.4)    |
| July 19-25, 2020                  | 0.3 (0.2-0.5)    | 0.4 (0.2-0.7)    | 0.2 (0.1-0.4)    |
| July 26-August 1, 2020            | 0.4 (0.3-0.6)    | 0.5 (0.3-0.8)    | 0.4 (0.3-0.7)    |
| August 2-8, 2020                  | 1.2 (1.0-1.4)    | 1.6 (1.3-2.0)    | 0.9 (0.7-1.2)    |
| August 9-15, 2020                 | 1.8 (1.5-2.0)    | 2.2 (1.8-2.6)    | 1.4 (1.2-1.8)    |
| August 16-22, 2020                | 2.7 (2.4-3.0)    | 3.0 (2.5-3.6)    | 2.5 (2.1-2.9)    |
| August 23-29, 2020                | 1.8 (1.5-2.1)    | 1.8 (1.4-2.3)    | 1.8 (1.5-2.2)    |
| August 30-September 5, 2020       | 1.2 (1.0-1.4)    | 1.3 (1.0-1.8)    | 1.0 (0.8-1.3)    |
| September 6-12, 2020              | 1.3 (1.1-1.6)    | 1.3 (1.0-1.8)    | 1.3 (1.0-1.7)    |
| September 13-19, 2020             | 2.2 (1.9-2.5)    | 2.3 (1.8-2.7)    | 2.1 (1.8-2.5)    |
| September 20-26, 2020             | 1.9 (1.7-2.2)    | 2.2 (1.8-2.6)    | 1.7 (1.4-2.0)    |
| September 27-October 3, 2020      | 2.3 (2.0-2.5)    | 2.3 (1.9-2.7)    | 2.2 (1.9-2.6)    |
| October 4-10, 2020                | 3.5 (3.2-3.9)    | 3.8 (3.3-4.3)    | 3.3 (2.9-3.8)    |
| October 11-17, 2020               | 4.6 (4.3-5.0)    | 5.6 (5.1-6.3)    | 3.8 (3.4-4.3)    |
| October 18-24, 2020               | 7.8 (7.3-8.2)    | 8.3 (7.6-9.0)    | 7.3 (6.8-7.9)    |
| October 25-31, 2020               | 8.4 (8.0-8.9)    | 9.4 (8.7-10.0)   | 7.7 (7.2-8.2)    |
| November 1-7, 2020                | 9.3 (8.9-9.8)    | 10.3 (9.7-11.0)  | 8.5 (7.9-9.0)    |
| November 8-14, 2020               | 12.7 (12.1-13.2) | 13.9 (13.1-14.8) | 11.6 (10.9-12.3) |
| November 15-21, 2020              | 12.9 (12.4-13.4) | 13.4 (12.6-14.2) | 12.5 (11.8-13.2) |
| November 22-28, 2020              | 12.6 (12.1-13.2) | 13.0 (12.2-13.9) | 12.3 (11.6-13.0) |
| November 29-December 5, 2020      | 13.5 (12.9-14.1) | 14.2 (13.3-15.2) | 12.8 (12.1-13.7) |
| December 6-12, 2020               | 12.1 (11.6-12.7) | 13.8 (12.9-14.8) | 10.8 (10.0-11.5) |
| December 13-19, 2020              | 11.0 (10.4-11.6) | 12.2 (11.3-13.1) | 10.0 (9.3-10.8)  |
| December 20-26, 2020              | 10.5 (9.9-11.2)  | 11.8 (10.8-13.0) | 9.4 (8.5-10.3)   |
| December 27, 2020-January 2, 2021 | 10.1 (9.5-10.8)  | 10.4 (9.4-11.5)  | 9.9 (9.0-10.8)   |
| January 3-9, 2021                 | 10.2 (9.6-10.8)  | 10.6 (9.7-11.6)  | 9.9 (9.1-10.7)   |
| January 10-16, 2021               | 9.8 (9.2-10.4)   | 10.7 (9.8-11.6)  | 9.1 (8.3-9.9)    |
| January 17-23, 2021               | 9.5 (8.9-10.1)   | 10.1 (9.3-11.1)  | 8.9 (8.1-9.7)    |
| January 24-30, 2021               | 6.9 (6.4-7.5)    | 7.7 (6.9-8.5)    | 6.3 (5.7-7.0)    |
| January 31-February 6, 2021       | 4.9 (4.5-5.4)    | 5.0 (4.3-5.7)    | 4.9 (4.3-5.5)    |
| February 7-13, 2021               | 5.4 (4.9-5.9)    | 5.8 (5.1-6.6)    | 5.0 (4.4-5.6)    |
| February 14-20, 2021              | 4.8 (4.4-5.3)    | 4.9 (4.3-5.6)    | 4.8 (4.2-5.4)    |
| February 21-27, 2021              | 3.4 (3.1-3.8)    | 3.7 (3.2-4.3)    | 3.2 (2.7-3.7)    |
| February 28-March 6, 2021         | 3.3 (2.9-3.7)    | 3.3 (2.8-3.9)    | 3.2 (2.7-3.7)    |
| March 7-13, 2021                  | 4.6 (4.2-5.0)    | 4.9 (4.3-5.6)    | 4.3 (3.8-4.9)    |
| March 14-20, 2021                 | 4.6 (4.2-5.1)    | 5.2 (4.6-5.9)    | 4.1 (3.6-4.7)    |
| March 21-27, 2021                 | 3.7 (3.4-4.1)    | 4.1 (3.6-4.7)    | 3.4 (2.9-3.9)    |
| March 28-April 3, 2021            | 4.5 (4.1-5.0)    | 5.0 (4.4-5.7)    | 4.2 (3.6-4.8)    |

| <b>Week</b>          | <b>Overall</b>   | <b>Male</b>      | <b>Female</b>    |
|----------------------|------------------|------------------|------------------|
| April 4-10, 2021     | 5.3 (4.9-5.8)    | 5.7 (5.1-6.4)    | 5.0 (4.5-5.6)    |
| April 11-17, 2021    | 5.4 (5.0-5.8)    | 5.5 (5.0-6.1)    | 5.2 (4.8-5.8)    |
| April 18-24, 2021    | 7.0 (6.6-7.4)    | 7.8 (7.3-8.5)    | 6.3 (5.8-6.8)    |
| April 25-May 1, 2021 | 7.4 (7.0-7.7)    | 8.2 (7.6-8.8)    | 6.7 (6.2-7.2)    |
| May 2-8, 2021        | 10.8 (10.4-11.3) | 12.0 (11.3-12.7) | 9.9 (9.3-10.5)   |
| May 9-15, 2021       | 12.1 (11.7-12.6) | 12.5 (11.9-13.3) | 11.8 (11.1-12.4) |
| May 16-22, 2021      | 13.2 (12.7-13.7) | 14.0 (13.2-14.8) | 12.5 (11.8-13.2) |
| May 23-29, 2021      | 11.6 (11.0-12.1) | 12.8 (11.9-13.6) | 10.6 (9.9-11.3)  |

**Supplementary Table 21 Weekly test positivity (%) for COVID-19 (95% confidence interval) according to age**

| Week                              | Overall          | <10              | 10-17            | 18-29            | 30-49            | 50-64            | ≥65              |
|-----------------------------------|------------------|------------------|------------------|------------------|------------------|------------------|------------------|
| March 8-14, 2020                  | 0.4 (0.2-0.8)    | 0.0 (0.0-1.6)    | 0.0 (0.0-3.8)    | 0.0 (0.0-1.0)    | 0.4 (0.1-1.1)    | 0.2 (0.0-1.2)    | 1.8 (0.9-3.8)    |
| March 15-21, 2020                 | 1.0 (0.7-1.4)    | 0.0 (0.0-1.6)    | 0.0 (0.0-4.4)    | 2.9 (1.7-4.7)    | 1.2 (0.7-2.0)    | 0.3 (0.1-1.0)    | 0.6 (0.2-1.8)    |
| March 22-28, 2020                 | 3.2 (2.6-4.0)    | 2.9 (0.9-9.0)    | 0.0 (0.0-10.0)   | 4.0 (2.5-6.4)    | 2.2 (1.5-3.3)    | 4.6 (3.3-6.4)    | 2.9 (1.7-4.9)    |
| March 29-April 4, 2020            | 1.2 (0.9-1.6)    | 1.1 (0.1-7.6)    | 0.0 (0.0-9.2)    | 1.4 (0.7-2.7)    | 0.9 (0.5-1.5)    | 1.5 (0.9-2.6)    | 1.7 (0.9-3.2)    |
| April 5-11, 2020                  | 0.7 (0.5-1.1)    | 0.0 (0.0-4.3)    | 2.9 (0.4-20.9)   | 1.0 (0.4-2.5)    | 0.5 (0.2-1.1)    | 0.7 (0.3-1.7)    | 1.2 (0.5-2.8)    |
| April 12-18, 2020                 | 0.6 (0.3-1.0)    | 0.0 (0.0-4.4)    | 0.0 (0.0-9.0)    | 1.4 (0.6-3.3)    | 0.5 (0.2-1.3)    | 0.2 (0.0-1.3)    | 0.8 (0.2-2.3)    |
| April 19-25, 2020                 | 0.5 (0.3-0.9)    | 0.0 (0.0-3.3)    | 0.0 (0.0-4.1)    | 0.4 (0.1-1.6)    | 0.9 (0.4-1.7)    | 0.0 (0.0-0.6)    | 1.0 (0.4-2.6)    |
| April 26-May 2, 2020              | 0.2 (0.1-0.4)    | 0.0 (0.0-2.5)    | 0.0 (0.0-3.1)    | 0.2 (0.0-1.2)    | 0.3 (0.1-0.8)    | 0.0 (0.0-0.4)    | 0.3 (0.1-1.1)    |
| May 3-9, 2020                     | 0.2 (0.1-0.4)    | 0.6 (0.1-4.6)    | 0.0 (0.0-3.7)    | 0.4 (0.1-1.7)    | 0.3 (0.1-0.9)    | 0.0 (0.0-0.5)    | 0.0 (0.0-0.6)    |
| May 10-16, 2020                   | 0.0 (0.0-0.2)    | 0.0 (0.0-1.9)    | 0.0 (0.0-3.1)    | 0.0 (0.0-0.7)    | 0.1 (0.0-0.6)    | 0.0 (0.0-0.4)    | 0.0 (0.0-0.4)    |
| May 17-23, 2020                   | 0.1 (0.0-0.2)    | 0.5 (0.1-3.5)    | 0.0 (0.0-2.9)    | 0.0 (0.0-0.6)    | 0.1 (0.0-0.7)    | 0.0 (0.0-0.4)    | 0.0 (0.0-0.4)    |
| May 24-30, 2020                   | 0.1 (0.1-0.3)    | 0.0 (0.0-1.6)    | 0.0 (0.0-2.8)    | 0.3 (0.1-1.2)    | 0.2 (0.0-0.6)    | 0.2 (0.0-0.7)    | 0.0 (0.0-0.3)    |
| May 31-June 6, 2020               | 0.0 (0.0-0.2)    | 0.0 (0.0-1.5)    | 0.0 (0.0-2.4)    | 0.2 (0.0-1.1)    | 0.1 (0.0-0.6)    | 0.0 (0.0-0.4)    | 0.0 (0.0-0.3)    |
| June 7-13, 2020                   | 0.1 (0.1-0.3)    | 0.0 (0.0-1.8)    | 0.7 (0.1-5.2)    | 0.1 (0.0-1.0)    | 0.3 (0.1-0.9)    | 0.0 (0.0-0.4)    | 0.0 (0.0-0.4)    |
| June 14-20, 2020                  | 0.2 (0.1-0.4)    | 0.0 (0.0-2.1)    | 0.0 (0.0-3.2)    | 0.2 (0.0-1.2)    | 0.4 (0.2-1.1)    | 0.3 (0.1-1.1)    | 0.0 (0.0-0.4)    |
| June 21-27, 2020                  | 0.2 (0.1-0.4)    | 0.0 (0.0-1.6)    | 0.0 (0.0-2.4)    | 0.3 (0.1-1.2)    | 0.5 (0.2-1.1)    | 0.1 (0.0-0.9)    | 0.0 (0.0-0.4)    |
| June 28-July 4, 2020              | 0.0 (0.0-0.1)    | 0.0 (0.0-1.8)    | 0.0 (0.0-3.0)    | 0.0 (0.0-0.6)    | 0.0 (0.0-0.4)    | 0.0 (0.0-0.6)    | 0.0 (0.0-0.5)    |
| July 5-11, 2020                   | 0.1 (0.0-0.3)    | 0.0 (0.0-1.1)    | 0.5 (0.1-3.7)    | 0.3 (0.1-1.1)    | 0.1 (0.0-0.6)    | 0.0 (0.0-0.5)    | 0.0 (0.0-0.5)    |
| July 12-18, 2020                  | 0.8 (0.6-1.1)    | 0.0 (0.0-0.7)    | 0.0 (0.0-1.4)    | 1.2 (0.7-2.0)    | 0.7 (0.4-1.3)    | 1.0 (0.5-2.0)    | 1.0 (0.5-1.9)    |
| July 19-25, 2020                  | 0.3 (0.2-0.5)    | 0.3 (0.1-1.1)    | 0.5 (0.1-2.0)    | 0.4 (0.2-0.9)    | 0.2 (0.1-0.5)    | 0.3 (0.1-0.9)    | 0.3 (0.1-0.9)    |
| July 26-August 1, 2020            | 0.4 (0.3-0.6)    | 0.0 (0.0-0.5)    | 0.0 (0.0-0.7)    | 0.4 (0.2-0.8)    | 0.8 (0.6-1.3)    | 0.1 (0.0-0.6)    | 0.4 (0.2-1.0)    |
| August 2-8, 2020                  | 1.2 (1.0-1.4)    | 0.9 (0.5-1.9)    | 1.7 (0.9-3.2)    | 1.4 (1.0-2.0)    | 1.5 (1.1-2.0)    | 0.7 (0.3-1.3)    | 0.5 (0.2-1.1)    |
| August 9-15, 2020                 | 1.8 (1.5-2.0)    | 2.3 (1.4-3.6)    | 2.4 (1.4-3.9)    | 1.3 (0.9-1.8)    | 2.0 (1.6-2.5)    | 1.9 (1.3-2.7)    | 1.2 (0.8-2.0)    |
| August 16-22, 2020                | 2.7 (2.4-3.0)    | 1.3 (0.7-2.6)    | 4.4 (3.0-6.5)    | 2.7 (2.1-3.4)    | 2.8 (2.3-3.5)    | 3.1 (2.3-4.1)    | 1.8 (1.2-2.7)    |
| August 23-29, 2020                | 1.8 (1.5-2.1)    | 1.1 (0.5-2.3)    | 4.8 (3.3-6.9)    | 1.7 (1.2-2.4)    | 1.6 (1.2-2.2)    | 1.8 (1.3-2.7)    | 1.3 (0.8-2.2)    |
| August 30-September 5, 2020       | 1.2 (1.0-1.4)    | 1.2 (0.6-2.4)    | 2.1 (1.1-3.9)    | 1.1 (0.7-1.7)    | 1.2 (0.8-1.7)    | 0.9 (0.6-1.6)    | 1.1 (0.7-1.8)    |
| September 6-12, 2020              | 1.3 (1.1-1.6)    | 1.3 (0.7-2.6)    | 2.0 (1.1-3.8)    | 1.3 (0.8-2.0)    | 1.3 (0.9-1.8)    | 1.5 (1.0-2.3)    | 0.8 (0.4-1.6)    |
| September 13-19, 2020             | 2.2 (1.9-2.5)    | 1.1 (0.7-1.9)    | 3.4 (2.4-4.7)    | 5.0 (4.1-6.1)    | 1.1 (0.8-1.6)    | 0.9 (0.5-1.6)    | 2.3 (1.6-3.4)    |
| September 20-26, 2020             | 1.9 (1.7-2.2)    | 0.8 (0.5-1.4)    | 1.6 (1.0-2.6)    | 2.8 (2.2-3.6)    | 1.8 (1.4-2.3)    | 2.0 (1.4-2.9)    | 2.3 (1.6-3.3)    |
| September 27-October 3, 2020      | 2.3 (2.0-2.5)    | 1.1 (0.8-1.7)    | 1.5 (1.0-2.3)    | 3.1 (2.5-3.9)    | 2.0 (1.6-2.5)    | 3.6 (2.8-4.6)    | 2.6 (1.9-3.7)    |
| October 4-10, 2020                | 3.5 (3.2-3.9)    | 1.6 (1.1-2.3)    | 2.9 (2.1-4.0)    | 4.0 (3.2-4.9)    | 3.4 (2.9-4.0)    | 4.5 (3.6-5.5)    | 4.9 (3.9-6.2)    |
| October 11-17, 2020               | 4.6 (4.3-5.0)    | 2.8 (2.1-3.7)    | 4.5 (3.4-5.8)    | 4.9 (4.1-5.9)    | 4.8 (4.2-5.5)    | 5.2 (4.3-6.3)    | 4.9 (3.9-6.2)    |
| October 18-24, 2020               | 7.8 (7.3-8.2)    | 4.8 (3.8-6.0)    | 8.4 (7.0-10.0)   | 6.8 (5.9-7.7)    | 8.0 (7.3-8.8)    | 8.3 (7.2-9.5)    | 10.1 (8.7-11.6)  |
| October 25-31, 2020               | 8.4 (8.0-8.9)    | 5.6 (4.5-6.8)    | 10.0 (8.6-11.7)  | 10.2 (9.3-11.3)  | 7.4 (6.8-8.1)    | 9.5 (8.6-10.6)   | 7.5 (6.5-8.8)    |
| November 1-7, 2020                | 9.3 (8.9-9.8)    | 5.8 (4.9-6.9)    | 8.4 (7.3-9.8)    | 10.3 (9.4-11.3)  | 8.4 (7.8-9.2)    | 10.9 (9.8-12.0)  | 11.9 (10.6-13.4) |
| November 8-14, 2020               | 12.7 (12.1-13.2) | 8.9 (7.6-10.4)   | 10.7 (9.2-12.4)  | 12.6 (11.5-13.8) | 11.8 (10.9-12.8) | 13.3 (12.0-14.6) | 18.3 (16.6-20.2) |
| November 15-21, 2020              | 12.9 (12.4-13.4) | 10.4 (9.0-12.1)  | 13.0 (11.3-14.9) | 13.2 (12.1-14.5) | 11.7 (10.8-12.6) | 13.2 (12.0-14.6) | 16.4 (14.9-18.0) |
| November 22-28, 2020              | 12.6 (12.1-13.2) | 9.7 (8.2-11.5)   | 14.1 (12.2-16.3) | 12.1 (10.9-13.3) | 12.0 (11.1-13.0) | 12.8 (11.5-14.2) | 15.2 (13.7-16.8) |
| November 29-December 5, 2020      | 13.5 (12.9-14.1) | 11.7 (10.0-13.7) | 15.5 (13.3-17.9) | 13.5 (12.2-15.0) | 11.9 (11.0-13.0) | 14.6 (13.2-16.2) | 15.4 (13.8-17.1) |
| December 6-12, 2020               | 12.1 (11.6-12.7) | 12.2 (10.4-14.3) | 13.4 (11.4-15.8) | 13.4 (12.1-14.9) | 10.9 (9.9-12.0)  | 11.5 (10.2-12.9) | 12.9 (11.5-14.6) |
| December 13-19, 2020              | 11.0 (10.4-11.6) | 12.2 (10.2-14.6) | 14.0 (11.6-16.7) | 10.4 (9.2-11.7)  | 10.1 (9.1-11.1)  | 10.8 (9.6-12.3)  | 11.7 (10.3-13.2) |
| December 20-26, 2020              | 10.5 (9.9-11.2)  | 12.8 (10.2-16.0) | 19.7 (16.2-24.0) | 11.3 (9.8-13.0)  | 9.4 (8.3-10.7)   | 9.8 (8.4-11.6)   | 8.1 (6.8-9.6)    |
| December 27, 2020-January 2, 2021 | 10.1 (9.5-10.8)  | 10.8 (8.3-14.1)  | 16.3 (13.1-20.3) | 9.1 (7.8-10.7)   | 9.2 (8.0-10.5)   | 11.3 (9.8-13.2)  | 9.3 (7.9-11.0)   |
| January 3-9, 2021                 | 10.2 (9.6-10.8)  | 14.1 (11.8-17.0) | 17.8 (14.8-21.5) | 11.0 (9.6-12.5)  | 9.4 (8.4-10.6)   | 9.3 (8.0-10.8)   | 7.3 (6.1-8.6)    |
| January 10-16, 2021               | 9.8 (9.2-10.4)   | 14.5 (12.3-17.1) | 19.4 (16.4-23.0) | 9.0 (7.8-10.5)   | 9.3 (8.2-10.4)   | 8.5 (7.3-10.0)   | 6.5 (5.4-7.8)    |
| January 17-23, 2021               | 9.5 (8.9-10.1)   | 15.4 (13.2-17.9) | 17.7 (14.9-20.9) | 9.5 (8.2-10.9)   | 8.1 (7.1-9.2)    | 8.2 (6.9-9.6)    | 4.9 (3.9-6.1)    |
| January 24-30, 2021               | 6.9 (6.4-7.5)    | 10.0 (8.3-12.1)  | 10.8 (8.7-13.5)  | 9.3 (8.0-10.9)   | 5.6 (4.8-6.5)    | 5.9 (4.9-7.2)    | 3.6 (2.8-4.6)    |
| January 31-February 6, 2021       | 4.9 (4.5-5.4)    | 6.6 (5.3-8.4)    | 7.2 (5.3-9.6)    | 6.1 (5.0-7.4)    | 4.1 (3.4-4.9)    | 3.8 (2.9-4.9)    | 3.9 (3.1-5.0)    |
| February 7-13, 2021               | 5.4 (4.9-5.9)    | 8.2 (6.7-10.1)   | 10.6 (8.3-13.6)  | 6.1 (5.0-7.4)    | 4.7 (4.0-5.6)    | 4.5 (3.6-5.7)    | 2.6 (1.9-3.6)    |
| February 14-20, 2021              | 4.8 (4.4-5.3)    | 7.1 (5.7-8.8)    | 7.1 (5.3-9.4)    | 5.8 (4.8-7.1)    | 4.2 (3.5-5.1)    | 4.0 (3.1-5.2)    | 3.0 (2.3-4.0)    |
| February 21-27, 2021              | 3.4 (3.1-3.8)    | 4.5 (3.4-5.8)    | 7.1 (5.3-9.5)    | 4.2 (3.3-5.4)    | 3.1 (2.5-3.8)    | 2.4 (1.7-3.3)    | 1.9 (1.3-2.7)    |
| February 28-March 6, 2021         | 3.3 (2.9-3.7)    | 2.9 (2.2-3.9)    | 4.9 (3.4-6.9)    | 4.8 (3.8-6.0)    | 2.8 (2.3-3.6)    | 3.0 (2.2-4.0)    | 2.2 (1.6-3.1)    |
| March 7-13, 2021                  | 4.6 (4.2-5.0)    | 5.6 (4.5-6.9)    | 7.7 (5.9-10.1)   | 5.4 (4.4-6.7)    | 4.3 (3.6-5.1)    | 4.2 (3.3-5.4)    | 2.3 (1.6-3.1)    |
| March 14-20, 2021                 | 4.6 (4.2-5.1)    | 5.8 (4.7-7.1)    | 7.3 (5.7-9.4)    | 5.4 (4.4-6.7)    | 4.7 (4.0-5.6)    | 4.1 (3.2-5.2)    | 1.4 (1.0-2.2)    |
| March 21-27, 2021                 | 3.7 (3.4-4.1)    | 3.6 (2.8-4.7)    | 7.0 (5.5-8.9)    | 5.0 (4.1-6.2)    | 2.9 (2.4-3.6)    | 3.1 (2.4-4.1)    | 2.4 (1.7-3.2)    |
| March 28-April 3, 2021            | 4.5 (4.1-5.0)    | 5.7 (4.4-7.3)    | 10.3 (8.0-13.2)  | 5.0 (4.1-6.2)    | 4.0 (3.3-4.8)    | 4.0 (3.1-5.1)    | 2.3 (1.6-3.2)    |
| April 4-10, 2021                  | 5.3 (4.9-5.8)    | 4.6 (3.6-5.8)    | 8.4 (6.8-10.3)   | 7.4 (6.4-8.6)    | 4.7 (4.0-5.5)    | 5.1 (4.2-6.3)    | 3.0 (2.2-3.9)    |

| <b>Week</b>          | <b>Overall</b>   | <b>&lt;10</b>    | <b>10-17</b>     | <b>18-29</b>     | <b>30-49</b>     | <b>50-64</b>     | <b>≥65</b>    |
|----------------------|------------------|------------------|------------------|------------------|------------------|------------------|---------------|
| April 11-17, 2021    | 5.4 (5.0-5.8)    | 5.4 (4.5-6.5)    | 6.4 (5.2-7.8)    | 7.2 (6.3-8.3)    | 5.1 (4.5-5.8)    | 4.7 (3.9-5.7)    | 3.4 (2.6-4.4) |
| April 18-24, 2021    | 7.0 (6.6-7.4)    | 7.4 (6.5-8.5)    | 9.9 (8.6-11.4)   | 8.1 (7.2-9.2)    | 6.6 (5.9-7.3)    | 6.9 (6.0-7.9)    | 3.1 (2.4-4.1) |
| April 25-May 1, 2021 | 7.4 (7.0-7.7)    | 7.2 (6.3-8.1)    | 8.6 (7.5-9.8)    | 9.0 (8.1-10.1)   | 7.4 (6.7-8.1)    | 6.9 (6.0-7.9)    | 3.7 (2.9-4.6) |
| May 2-8, 2021        | 10.8 (10.4-11.3) | 10.8 (9.8-11.9)  | 11.2 (9.9-12.7)  | 13.7 (12.6-15.0) | 11.1 (10.3-12.0) | 10.6 (9.4-11.9)  | 4.6 (3.8-5.7) |
| May 9-15, 2021       | 12.1 (11.7-12.6) | 9.6 (8.6-10.8)   | 14.6 (13.1-16.3) | 15.6 (14.4-16.8) | 12.4 (11.5-13.3) | 11.4 (10.2-12.7) | 6.2 (5.2-7.4) |
| May 16-22, 2021      | 13.2 (12.7-13.7) | 11.7 (10.5-13.1) | 16.2 (14.4-18.2) | 15.8 (14.6-17.0) | 13.5 (12.6-14.5) | 12.3 (11.1-13.7) | 7.7 (6.6-9.0) |
| May 23-29, 2021      | 11.6 (11.0-12.1) | 12.1 (10.6-13.7) | 15.4 (13.5-17.6) | 13.7 (12.5-15.1) | 11.7 (10.8-12.8) | 9.3 (8.2-10.6)   | 6.9 (5.8-8.2) |

**Supplementary Table 22 Weekly test positivity (%) for COVID-19 (95% confidence interval) according to income quintile**

| <b>Week</b>                       | <b>Overall</b>   | <b>Q1 (lowest)</b> | <b>Q2</b>        | <b>Q3</b>        | <b>Q4</b>        | <b>Q5 (highest)</b> |
|-----------------------------------|------------------|--------------------|------------------|------------------|------------------|---------------------|
| March 8-14, 2020                  | 0.4 (0.2-0.8)    | 0.3 (0.0-2.0)      | 0.5 (0.1-2.1)    | 0.4 (0.1-1.6)    | 0.6 (0.2-1.7)    | 0.5 (0.1-1.4)       |
| March 15-21, 2020                 | 1.0 (0.7-1.4)    | 0.6 (0.2-1.9)      | 0.3 (0.1-1.4)    | 0.8 (0.3-1.9)    | 1.3 (0.7-2.5)    | 1.5 (0.9-2.5)       |
| March 22-28, 2020                 | 3.2 (2.6-4.0)    | 1.8 (0.8-3.7)      | 1.8 (0.9-3.4)    | 2.8 (1.7-4.7)    | 4.2 (2.8-6.2)    | 5.1 (3.7-7.1)       |
| March 29-April 4, 2020            | 1.2 (0.9-1.6)    | 1.0 (0.5-2.0)      | 0.8 (0.4-1.8)    | 0.9 (0.4-1.9)    | 1.3 (0.7-2.4)    | 2.3 (1.4-3.7)       |
| April 5-11, 2020                  | 0.7 (0.5-1.1)    | 0.7 (0.3-1.9)      | 0.2 (0.0-1.3)    | 1.7 (0.9-3.3)    | 0.6 (0.2-2.0)    | 0.6 (0.2-1.9)       |
| April 12-18, 2020                 | 0.6 (0.3-1.0)    | 0.7 (0.2-2.1)      | 0.9 (0.3-2.3)    | 0.5 (0.1-2.0)    | 0.7 (0.2-2.2)    | 0.3 (0.0-1.8)       |
| April 19-25, 2020                 | 0.5 (0.3-0.9)    | 0.7 (0.3-1.9)      | 0.2 (0.0-1.2)    | 1.4 (0.7-3.0)    | 0.0 (0.0-0.8)    | 0.4 (0.1-1.8)       |
| April 26-May 2, 2020              | 0.2 (0.1-0.4)    | 0.6 (0.2-1.5)      | 0.1 (0.0-1.1)    | 0.1 (0.0-1.0)    | 0.0 (0.0-0.6)    | 0.0 (0.0-0.5)       |
| May 3-9, 2020                     | 0.2 (0.1-0.4)    | 0.0 (0.0-0.5)      | 0.0 (0.0-0.6)    | 0.7 (0.2-1.8)    | 0.3 (0.1-1.4)    | 0.0 (0.0-0.7)       |
| May 10-16, 2020                   | 0.0 (0.0-0.2)    | 0.0 (0.0-0.5)      | 0.1 (0.0-1.0)    | 0.0 (0.0-0.5)    | 0.0 (0.0-0.5)    | 0.0 (0.0-0.6)       |
| May 17-23, 2020                   | 0.1 (0.0-0.2)    | 0.0 (0.0-0.5)      | 0.3 (0.1-1.1)    | 0.0 (0.0-0.5)    | 0.0 (0.0-0.5)    | 0.0 (0.0-0.5)       |
| May 24-30, 2020                   | 0.1 (0.1-0.3)    | 0.0 (0.0-0.4)      | 0.4 (0.2-1.1)    | 0.2 (0.1-0.9)    | 0.0 (0.0-0.4)    | 0.0 (0.0-0.4)       |
| May 31-June 6, 2020               | 0.0 (0.0-0.2)    | 0.0 (0.0-0.4)      | 0.0 (0.0-0.4)    | 0.1 (0.0-0.8)    | 0.0 (0.0-0.5)    | 0.1 (0.0-0.9)       |
| June 7-13, 2020                   | 0.1 (0.1-0.3)    | 0.0 (0.0-0.5)      | 0.3 (0.1-1.0)    | 0.0 (0.0-0.5)    | 0.0 (0.0-0.5)    | 0.3 (0.1-1.2)       |
| June 14-20, 2020                  | 0.2 (0.1-0.4)    | 0.1 (0.0-0.9)      | 0.0 (0.0-0.6)    | 0.2 (0.0-1.1)    | 0.5 (0.2-1.5)    | 0.4 (0.1-1.5)       |
| June 21-27, 2020                  | 0.2 (0.1-0.4)    | 0.2 (0.1-1.0)      | 0.0 (0.0-0.5)    | 0.4 (0.1-1.2)    | 0.4 (0.1-1.2)    | 0.1 (0.0-1.0)       |
| June 28-July 4, 2020              | 0.0 (0.0-0.1)    | 0.0 (0.0-0.5)      | 0.0 (0.0-0.6)    | 0.0 (0.0-0.6)    | 0.0 (0.0-0.6)    | 0.0 (0.0-0.7)       |
| July 5-11, 2020                   | 0.1 (0.0-0.3)    | 0.0 (0.0-0.5)      | 0.1 (0.0-0.9)    | 0.1 (0.0-0.9)    | 0.1 (0.0-0.9)    | 0.0 (0.0-0.6)       |
| July 12-18, 2020                  | 0.8 (0.6-1.1)    | 0.1 (0.0-0.8)      | 0.7 (0.3-1.5)    | 0.4 (0.1-1.0)    | 0.2 (0.0-0.8)    | 0.5 (0.2-1.2)       |
| July 19-25, 2020                  | 0.3 (0.2-0.5)    | 0.5 (0.2-1.0)      | 0.4 (0.2-0.9)    | 0.3 (0.1-0.8)    | 0.2 (0.1-0.7)    | 0.1 (0.0-0.6)       |
| July 26-August 1, 2020            | 0.4 (0.3-0.6)    | 0.4 (0.2-0.9)      | 0.9 (0.5-1.5)    | 0.3 (0.1-0.7)    | 0.6 (0.3-1.2)    | 0.0 (0.0-0.2)       |
| August 2-8, 2020                  | 1.2 (1.0-1.4)    | 1.1 (0.7-1.8)      | 2.3 (1.7-3.2)    | 0.7 (0.4-1.2)    | 0.8 (0.5-1.4)    | 1.2 (0.8-1.9)       |
| August 9-15, 2020                 | 1.8 (1.5-2.0)    | 2.2 (1.6-3.0)      | 1.9 (1.4-2.6)    | 1.2 (0.8-1.8)    | 1.4 (0.9-2.0)    | 2.2 (1.7-3.0)       |
| August 16-22, 2020                | 2.7 (2.4-3.0)    | 1.7 (1.2-2.5)      | 1.6 (1.1-2.3)    | 2.9 (2.3-3.8)    | 4.9 (4.0-5.9)    | 2.2 (1.6-3.0)       |
| August 23-29, 2020                | 1.8 (1.5-2.1)    | 1.9 (1.3-2.7)      | 1.5 (1.0-2.2)    | 2.1 (1.5-2.9)    | 2.0 (1.4-2.7)    | 1.5 (1.0-2.2)       |
| August 30-September 5, 2020       | 1.2 (1.0-1.4)    | 2.0 (1.5-2.9)      | 0.8 (0.5-1.4)    | 0.6 (0.3-1.1)    | 1.2 (0.8-1.9)    | 1.3 (0.8-1.9)       |
| September 6-12, 2020              | 1.3 (1.1-1.6)    | 2.1 (1.4-3.0)      | 2.2 (1.5-3.0)    | 0.7 (0.4-1.3)    | 1.2 (0.7-1.9)    | 0.5 (0.3-1.1)       |
| September 13-19, 2020             | 2.2 (1.9-2.5)    | 2.6 (2.0-3.4)      | 2.1 (1.6-2.9)    | 1.3 (0.9-2.0)    | 2.0 (1.5-2.8)    | 2.6 (2.0-3.4)       |
| September 20-26, 2020             | 1.9 (1.7-2.2)    | 3.3 (2.5-4.2)      | 1.9 (1.4-2.5)    | 1.6 (1.2-2.2)    | 1.2 (0.9-1.8)    | 1.7 (1.3-2.3)       |
| September 27-October 3, 2020      | 2.3 (2.0-2.5)    | 4.6 (3.8-5.5)      | 1.6 (1.2-2.2)    | 1.5 (1.1-2.0)    | 1.6 (1.2-2.2)    | 1.8 (1.4-2.4)       |
| October 4-10, 2020                | 3.5 (3.2-3.9)    | 5.5 (4.6-6.5)      | 3.3 (2.6-4.1)    | 2.7 (2.1-3.4)    | 3.1 (2.5-3.9)    | 2.5 (1.9-3.2)       |
| October 11-17, 2020               | 4.6 (4.3-5.0)    | 6.7 (5.8-7.8)      | 4.5 (3.7-5.4)    | 3.3 (2.6-4.1)    | 4.3 (3.5-5.2)    | 3.9 (3.2-4.7)       |
| October 18-24, 2020               | 7.8 (7.3-8.2)    | 11.0 (9.9-12.2)    | 7.4 (6.5-8.5)    | 6.4 (5.6-7.4)    | 6.8 (5.9-7.8)    | 6.1 (5.2-7.0)       |
| October 25-31, 2020               | 8.4 (8.0-8.9)    | 12.4 (11.3-13.5)   | 6.6 (5.9-7.5)    | 7.2 (6.4-8.1)    | 8.4 (7.5-9.4)    | 7.6 (6.7-8.5)       |
| November 1-7, 2020                | 9.3 (8.9-9.8)    | 11.6 (10.6-12.7)   | 8.2 (7.3-9.1)    | 8.2 (7.4-9.2)    | 9.8 (8.9-10.8)   | 8.2 (7.4-9.1)       |
| November 8-14, 2020               | 12.7 (12.1-13.2) | 14.8 (13.5-16.2)   | 13.1 (12.0-14.4) | 11.0 (10.0-12.2) | 13.9 (12.7-15.2) | 9.4 (8.4-10.5)      |
| November 15-21, 2020              | 12.9 (12.4-13.4) | 17.0 (15.7-18.4)   | 13.1 (12.0-14.3) | 11.3 (10.2-12.5) | 12.7 (11.6-14.0) | 9.9 (8.8-11.1)      |
| November 22-28, 2020              | 12.6 (12.1-13.2) | 16.0 (14.7-17.3)   | 12.3 (11.1-13.5) | 10.8 (9.7-12.0)  | 12.7 (11.5-14.0) | 9.2 (8.1-10.4)      |
| November 29-December 5, 2020      | 13.5 (12.9-14.1) | 19.0 (17.6-20.6)   | 13.6 (12.3-15.0) | 11.5 (10.2-12.9) | 10.9 (9.6-12.2)  | 8.7 (7.5-10.0)      |
| December 6-12, 2020               | 12.1 (11.6-12.7) | 17.4 (16.1-18.9)   | 12.0 (10.8-13.4) | 8.0 (6.9-9.2)    | 9.6 (8.4-10.9)   | 8.9 (7.8-10.3)      |
| December 13-19, 2020              | 11.0 (10.4-11.6) | 14.3 (13.0-15.7)   | 11.6 (10.4-13.0) | 9.2 (7.9-10.6)   | 10.2 (8.9-11.6)  | 7.6 (6.5-8.8)       |
| December 20-26, 2020              | 10.5 (9.9-11.2)  | 13.3 (11.9-15.0)   | 10.3 (8.9-12.0)  | 10.2 (8.7-12.1)  | 9.2 (7.8-11.0)   | 7.7 (6.4-9.3)       |
| December 27, 2020-January 2, 2021 | 10.1 (9.5-10.8)  | 12.2 (10.7-13.8)   | 10.9 (9.4-12.6)  | 7.9 (6.6-9.4)    | 9.0 (7.6-10.7)   | 8.9 (7.4-10.7)      |
| January 3-9, 2021                 | 10.2 (9.6-10.8)  | 11.1 (9.9-12.5)    | 10.6 (9.2-12.1)  | 8.7 (7.4-10.2)   | 12.0 (10.5-13.6) | 7.6 (6.3-9.0)       |
| January 10-16, 2021               | 9.8 (9.2-10.4)   | 15.2 (13.8-16.8)   | 10.0 (8.8-11.4)  | 5.4 (4.3-6.6)    | 8.9 (7.6-10.4)   | 6.2 (5.1-7.5)       |
| January 17-23, 2021               | 9.5 (8.9-10.1)   | 15.0 (13.6-16.5)   | 10.8 (9.5-12.3)  | 5.4 (4.4-6.7)    | 5.1 (4.1-6.4)    | 6.6 (5.5-8.0)       |
| January 24-30, 2021               | 6.9 (6.4-7.5)    | 12.4 (11.1-13.9)   | 6.5 (5.5-7.8)    | 3.5 (2.7-4.5)    | 4.8 (3.9-6.0)    | 4.6 (3.6-5.7)       |
| January 31-February 6, 2021       | 4.9 (4.5-5.4)    | 7.8 (6.7-9.1)      | 4.4 (3.5-5.4)    | 3.3 (2.6-4.4)    | 3.6 (2.8-4.7)    | 5.2 (4.2-6.4)       |
| February 7-13, 2021               | 5.4 (4.9-5.9)    | 7.6 (6.5-8.8)      | 5.3 (4.3-6.6)    | 3.7 (2.8-4.8)    | 3.6 (2.8-4.7)    | 6.3 (5.2-7.6)       |
| February 14-20, 2021              | 4.8 (4.4-5.3)    | 8.5 (7.4-9.7)      | 4.0 (3.2-5.1)    | 3.1 (2.4-4.1)    | 2.9 (2.2-3.9)    | 4.0 (3.2-5.1)       |
| February 21-27, 2021              | 3.4 (3.1-3.8)    | 6.0 (5.0-7.1)      | 3.5 (2.8-4.5)    | 2.1 (1.5-3.0)    | 1.9 (1.3-2.7)    | 3.1 (2.4-4.0)       |
| February 28-March 6, 2021         | 3.3 (2.9-3.7)    | 6.8 (5.8-7.9)      | 3.4 (2.7-4.4)    | 1.6 (1.1-2.4)    | 1.9 (1.3-2.7)    | 1.8 (1.2-2.5)       |
| March 7-13, 2021                  | 4.6 (4.2-5.0)    | 8.5 (7.5-9.8)      | 4.2 (3.3-5.2)    | 2.4 (1.8-3.3)    | 4.1 (3.2-5.2)    | 2.6 (1.9-3.5)       |
| March 14-20, 2021                 | 4.6 (4.2-5.1)    | 9.3 (8.2-10.5)     | 2.4 (1.8-3.2)    | 3.3 (2.6-4.2)    | 3.5 (2.7-4.4)    | 2.7 (2.1-3.6)       |
| March 21-27, 2021                 | 3.7 (3.4-4.1)    | 6.6 (5.7-7.7)      | 3.6 (2.8-4.4)    | 2.7 (2.1-3.6)    | 2.6 (1.9-3.4)    | 2.3 (1.7-3.1)       |
| March 28-April 3, 2021            | 4.5 (4.1-5.0)    | 7.4 (6.4-8.6)      | 4.1 (3.2-5.1)    | 3.2 (2.5-4.2)    | 4.0 (3.2-5.1)    | 3.4 (2.6-4.5)       |

| <b>Week</b>          | <b>Overall</b>   | <b>Q1 (lowest)</b> | <b>Q2</b>        | <b>Q3</b>        | <b>Q4</b>       | <b>Q5 (highest)</b> |
|----------------------|------------------|--------------------|------------------|------------------|-----------------|---------------------|
| April 4-10, 2021     | 5.3 (4.9-5.8)    | 6.1 (5.2-7.2)      | 5.2 (4.4-6.2)    | 5.3 (4.4-6.4)    | 5.6 (4.7-6.6)   | 4.4 (3.6-5.4)       |
| April 11-17, 2021    | 5.4 (5.0-5.8)    | 7.3 (6.5-8.3)      | 4.6 (3.9-5.5)    | 5.2 (4.4-6.1)    | 5.8 (5.0-6.9)   | 4.1 (3.4-4.9)       |
| April 18-24, 2021    | 7.0 (6.6-7.4)    | 9.3 (8.3-10.3)     | 6.2 (5.5-7.1)    | 7.1 (6.3-8.1)    | 6.5 (5.7-7.5)   | 5.5 (4.8-6.4)       |
| April 25-May 1, 2021 | 7.4 (7.0-7.7)    | 10.0 (9.0-11.0)    | 7.2 (6.5-8.1)    | 8.1 (7.2-9.0)    | 6.6 (5.8-7.5)   | 5.0 (4.3-5.7)       |
| May 2-8, 2021        | 10.8 (10.4-11.3) | 13.7 (12.6-14.8)   | 10.8 (9.8-11.8)  | 10.9 (9.9-12.0)  | 8.9 (7.9-9.9)   | 8.7 (7.8-9.7)       |
| May 9-15, 2021       | 12.1 (11.7-12.6) | 14.8 (13.7-16.0)   | 13.4 (12.3-14.5) | 12.3 (11.2-13.4) | 10.6 (9.6-11.7) | 8.8 (7.9-9.9)       |
| May 16-22, 2021      | 13.2 (12.7-13.7) | 17.5 (16.3-18.8)   | 14.3 (13.2-15.6) | 12.7 (11.6-13.9) | 10.2 (9.2-11.4) | 9.4 (8.4-10.6)      |
| May 23-29, 2021      | 11.6 (11.0-12.1) | 15.3 (14.1-16.7)   | 13.3 (12.1-14.6) | 10.0 (8.9-11.2)  | 10.1 (9.0-11.4) | 7.6 (6.6-8.8)       |

**Supplementary Table 23 Weekly test positivity (%) for COVID-19 (95% confidence interval) according to region**

| <b>Week</b>                       | <b>Overall</b>   | <b>Interlake-Eastern</b> | <b>Northern</b>  | <b>Southern</b>  | <b>Prairie Mountain</b> | <b>Winnipeg</b>  |
|-----------------------------------|------------------|--------------------------|------------------|------------------|-------------------------|------------------|
| March 8-14, 2020                  | 0.4 (0.2-0.8)    | 0.5 (0.1-3.2)            | 0.0 (0.0-2.9)    | 0.6 (0.2-2.6)    | 0.0 (0.0-1.6)           | 0.5 (0.3-1.0)    |
| March 15-21, 2020                 | 1.0 (0.7-1.4)    | 0.3 (0.0-2.0)            | 0.0 (0.0-2.4)    | 0.4 (0.1-1.6)    | 1.3 (0.5-3.1)           | 1.3 (0.9-2.0)    |
| March 22-28, 2020                 | 3.2 (2.6-4.0)    | 1.3 (0.5-3.4)            | 1.4 (0.3-5.4)    | 2.7 (1.4-4.9)    | 0.8 (0.2-3.3)           | 4.2 (3.4-5.3)    |
| March 29-April 4, 2020            | 1.2 (0.9-1.6)    | 1.2 (0.5-2.7)            | 0.3 (0.0-2.3)    | 1.1 (0.5-2.7)    | 0.2 (0.0-1.6)           | 1.6 (1.2-2.2)    |
| April 5-11, 2020                  | 0.7 (0.5-1.1)    | 1.5 (0.5-3.9)            | 0.0 (0.0-1.4)    | 0.6 (0.2-2.5)    | 0.3 (0.0-2.5)           | 0.8 (0.5-1.4)    |
| April 12-18, 2020                 | 0.6 (0.3-1.0)    | 0.0 (0.0-1.8)            | 0.0 (0.0-1.6)    | 0.3 (0.0-2.2)    | 0.5 (0.1-3.3)           | 0.9 (0.5-1.6)    |
| April 19-25, 2020                 | 0.5 (0.3-0.9)    | 0.4 (0.1-2.6)            | 0.0 (0.0-1.4)    | 0.5 (0.1-2.1)    | 0.6 (0.1-2.3)           | 0.6 (0.3-1.2)    |
| April 26-May 2, 2020              | 0.2 (0.1-0.4)    | 0.0 (0.0-1.1)            | 0.0 (0.0-1.3)    | 0.0 (0.0-0.9)    | 1.1 (0.4-3.0)           | 0.1 (0.0-0.4)    |
| May 3-9, 2020                     | 0.2 (0.1-0.4)    | 0.0 (0.0-1.3)            | 0.0 (0.0-1.4)    | 0.0 (0.0-1.0)    | 1.3 (0.5-3.0)           | 0.1 (0.0-0.4)    |
| May 10-16, 2020                   | 0.0 (0.0-0.2)    | 0.0 (0.0-1.1)            | 0.0 (0.0-1.4)    | 0.0 (0.0-0.8)    | 0.0 (0.0-0.8)           | 0.0 (0.0-0.3)    |
| May 17-23, 2020                   | 0.1 (0.0-0.2)    | 0.0 (0.0-1.1)            | 0.0 (0.0-1.3)    | 0.0 (0.0-0.9)    | 0.0 (0.0-0.9)           | 0.1 (0.0-0.4)    |
| May 24-30, 2020                   | 0.1 (0.1-0.3)    | 0.0 (0.0-0.9)            | 0.0 (0.0-0.9)    | 0.7 (0.2-1.7)    | 0.0 (0.0-0.6)           | 0.1 (0.0-0.3)    |
| May 31-June 6, 2020               | 0.0 (0.0-0.2)    | 0.0 (0.0-0.9)            | 0.0 (0.0-1.0)    | 0.0 (0.0-0.6)    | 0.0 (0.0-0.7)           | 0.1 (0.0-0.3)    |
| June 7-13, 2020                   | 0.1 (0.1-0.3)    | 0.0 (0.0-0.9)            | 0.0 (0.0-1.0)    | 0.0 (0.0-0.8)    | 0.0 (0.0-0.8)           | 0.2 (0.1-0.6)    |
| June 14-20, 2020                  | 0.2 (0.1-0.4)    | 0.0 (0.0-1.1)            | 0.0 (0.0-1.1)    | 0.4 (0.1-1.6)    | 0.0 (0.0-1.0)           | 0.3 (0.1-0.6)    |
| June 21-27, 2020                  | 0.2 (0.1-0.4)    | 0.0 (0.0-0.9)            | 0.0 (0.0-1.2)    | 0.3 (0.1-1.3)    | 0.0 (0.0-0.8)           | 0.3 (0.2-0.7)    |
| June 28-July 4, 2020              | 0.0 (0.0-0.1)    | 0.0 (0.0-1.2)            | 0.0 (0.0-1.4)    | 0.0 (0.0-0.7)    | 0.0 (0.0-1.0)           | 0.0 (0.0-0.2)    |
| July 5-11, 2020                   | 0.1 (0.0-0.3)    | 0.2 (0.0-1.7)            | 0.0 (0.0-1.4)    | 0.3 (0.1-1.2)    | 0.0 (0.0-0.8)           | 0.0 (0.0-0.3)    |
| July 12-18, 2020                  | 0.8 (0.6-1.1)    | 3.6 (2.4-5.3)            | 0.0 (0.0-1.2)    | 0.7 (0.3-1.6)    | 0.9 (0.4-2.1)           | 0.2 (0.1-0.4)    |
| July 19-25, 2020                  | 0.3 (0.2-0.5)    | 0.6 (0.3-1.5)            | 0.0 (0.0-1.1)    | 0.7 (0.4-1.4)    | 0.5 (0.2-1.1)           | 0.1 (0.0-0.3)    |
| July 26-August 1, 2020            | 0.4 (0.3-0.6)    | 0.5 (0.2-1.2)            | 0.0 (0.0-1.0)    | 0.8 (0.5-1.5)    | 1.2 (0.7-1.9)           | 0.1 (0.0-0.3)    |
| August 2-8, 2020                  | 1.2 (1.0-1.4)    | 0.2 (0.1-0.9)            | 0.0 (0.0-1.0)    | 1.9 (1.4-2.7)    | 3.7 (2.9-4.7)           | 0.2 (0.1-0.4)    |
| August 9-15, 2020                 | 1.8 (1.5-2.0)    | 0.1 (0.0-0.7)            | 0.0 (0.0-0.7)    | 3.2 (2.5-4.3)    | 4.0 (3.2-4.9)           | 0.8 (0.6-1.1)    |
| August 16-22, 2020                | 2.7 (2.4-3.0)    | 0.9 (0.4-1.9)            | 0.2 (0.0-1.5)    | 4.5 (3.6-5.6)    | 8.3 (7.0-9.8)           | 0.7 (0.5-0.9)    |
| August 23-29, 2020                | 1.8 (1.5-2.1)    | 0.9 (0.4-2.0)            | 0.0 (0.0-0.7)    | 2.2 (1.5-3.1)    | 4.5 (3.6-5.7)           | 1.2 (0.9-1.5)    |
| August 30-September 5, 2020       | 1.2 (1.0-1.4)    | 1.2 (0.6-2.4)            | 0.0 (0.0-0.9)    | 1.5 (0.9-2.4)    | 1.1 (0.7-1.8)           | 1.2 (0.9-1.5)    |
| September 6-12, 2020              | 1.3 (1.1-1.6)    | 1.5 (0.8-2.8)            | 0.6 (0.2-2.0)    | 1.8 (1.1-3.0)    | 1.0 (0.5-1.9)           | 1.3 (1.0-1.7)    |
| September 13-19, 2020             | 2.2 (1.9-2.5)    | 1.3 (0.8-2.2)            | 0.4 (0.1-1.7)    | 1.6 (1.0-2.4)    | 1.3 (0.7-2.2)           | 2.7 (2.3-3.1)    |
| September 20-26, 2020             | 1.9 (1.7-2.2)    | 2.3 (1.5-3.5)            | 2.5 (1.4-4.5)    | 1.2 (0.8-2.0)    | 0.6 (0.3-1.3)           | 2.1 (1.8-2.4)    |
| September 27-October 3, 2020      | 2.3 (2.0-2.5)    | 3.3 (2.5-4.4)            | 0.3 (0.1-1.1)    | 1.0 (0.6-1.6)    | 0.4 (0.2-1.0)           | 2.7 (2.4-3.1)    |
| October 4-10, 2020                | 3.5 (3.2-3.9)    | 2.1 (1.5-3.0)            | 1.2 (0.6-2.4)    | 3.5 (2.6-4.6)    | 0.8 (0.4-1.5)           | 4.3 (3.9-4.8)    |
| October 11-17, 2020               | 4.6 (4.3-5.0)    | 4.1 (3.1-5.4)            | 4.8 (3.5-6.5)    | 3.2 (2.5-4.2)    | 1.6 (1.1-2.5)           | 5.3 (4.9-5.9)    |
| October 18-24, 2020               | 7.8 (7.3-8.2)    | 7.8 (6.5-9.4)            | 6.2 (5.0-7.8)    | 7.5 (6.4-8.8)    | 2.4 (1.6-3.4)           | 8.6 (8.0-9.2)    |
| October 25-31, 2020               | 8.4 (8.0-8.9)    | 9.0 (7.7-10.5)           | 5.9 (4.9-7.2)    | 9.9 (8.7-11.2)   | 3.7 (2.9-4.8)           | 9.1 (8.6-9.7)    |
| November 1-7, 2020                | 9.3 (8.9-9.8)    | 6.2 (5.2-7.3)            | 13.5 (11.6-15.8) | 14.1 (12.8-15.6) | 4.0 (3.3-5.0)           | 9.4 (8.8-9.9)    |
| November 8-14, 2020               | 12.7 (12.1-13.2) | 7.6 (6.3-9.1)            | 15.2 (13.1-17.6) | 22.3 (20.5-24.2) | 5.7 (4.6-7.0)           | 11.9 (11.2-12.6) |
| November 15-21, 2020              | 12.9 (12.4-13.4) | 7.9 (6.7-9.3)            | 15.8 (13.7-18.2) | 19.9 (18.3-21.5) | 6.4 (5.4-7.7)           | 12.6 (12.0-13.3) |
| November 22-28, 2020              | 12.6 (12.1-13.2) | 9.4 (7.9-11.1)           | 15.7 (13.6-18.0) | 17.1 (15.5-18.9) | 5.0 (4.1-6.3)           | 12.8 (12.1-13.5) |
| November 29-December 5, 2020      | 13.5 (12.9-14.1) | 11.0 (9.3-12.8)          | 19.1 (16.9-21.5) | 14.2 (12.5-16.2) | 8.1 (6.7-9.7)           | 13.6 (12.9-14.4) |
| December 6-12, 2020               | 12.1 (11.6-12.7) | 11.3 (9.7-13.2)          | 20.3 (17.9-23.0) | 12.7 (11.0-14.6) | 8.7 (7.3-10.5)          | 11.3 (10.6-12.1) |
| December 13-19, 2020              | 11.0 (10.4-11.6) | 9.9 (8.2-11.8)           | 17.2 (15.3-19.5) | 13.4 (11.8-15.4) | 6.9 (5.5-8.5)           | 9.9 (9.1-10.6)   |
| December 20-26, 2020              | 10.5 (9.9-11.2)  | 11.9 (9.6-14.6)          | 16.3 (14.0-19.1) | 12.7 (10.8-15.0) | 6.3 (4.8-8.4)           | 9.3 (8.5-10.2)   |
| December 27, 2020-January 2, 2021 | 10.1 (9.5-10.8)  | 7.2 (5.6-9.4)            | 16.6 (14.1-19.6) | 9.5 (7.8-11.7)   | 5.2 (3.8-7.0)           | 10.2 (9.4-11.2)  |
| January 3-9, 2021                 | 10.2 (9.6-10.8)  | 6.1 (4.8-7.9)            | 21.1 (18.9-23.6) | 6.8 (5.5-8.5)    | 12.2 (10.3-14.5)        | 8.2 (7.4-8.9)    |
| January 10-16, 2021               | 9.8 (9.2-10.4)   | 7.7 (6.1-9.8)            | 25.7 (23.4-28.2) | 5.4 (4.2-6.9)    | 5.5 (4.3-7.1)           | 6.9 (6.2-7.6)    |
| January 17-23, 2021               | 9.5 (8.9-10.1)   | 10.5 (8.8-12.7)          | 23.4 (21.3-25.7) | 5.4 (4.1-7.1)    | 7.7 (6.2-9.6)           | 5.3 (4.7-6.0)    |
| January 24-30, 2021               | 6.9 (6.4-7.5)    | 11.0 (9.2-13.1)          | 19.8 (17.7-22.3) | 4.1 (3.0-5.6)    | 4.6 (3.5-6.0)           | 3.3 (2.8-3.8)    |
| January 31-February 6, 2021       | 4.9 (4.5-5.4)    | 4.4 (3.2-5.9)            | 13.4 (11.5-15.5) | 3.9 (2.9-5.3)    | 3.2 (2.3-4.4)           | 3.3 (2.8-3.9)    |
| February 7-13, 2021               | 5.4 (4.9-5.9)    | 2.3 (1.5-3.6)            | 16.3 (14.3-18.5) | 4.9 (3.7-6.4)    | 2.1 (1.3-3.3)           | 3.3 (2.8-3.9)    |
| February 14-20, 2021              | 4.8 (4.4-5.3)    | 2.8 (1.9-4.1)            | 14.8 (12.9-16.9) | 1.5 (0.9-2.4)    | 0.2 (0.1-1.0)           | 3.8 (3.3-4.4)    |
| February 21-27, 2021              | 3.4 (3.1-3.8)    | 2.1 (1.4-3.3)            | 12.7 (10.9-14.9) | 1.4 (0.9-2.4)    | 0.1 (0.0-0.7)           | 2.6 (2.2-3.0)    |
| February 28-March 6, 2021         | 3.3 (2.9-3.7)    | 1.2 (0.7-2.2)            | 13.5 (11.7-15.7) | 1.8 (1.1-2.8)    | 0.6 (0.3-1.4)           | 1.8 (1.5-2.2)    |
| March 7-13, 2021                  | 4.6 (4.2-5.0)    | 1.3 (0.7-2.3)            | 15.4 (13.6-17.5) | 3.0 (2.1-4.2)    | 1.9 (1.2-2.9)           | 2.9 (2.5-3.4)    |
| March 14-20, 2021                 | 4.6 (4.2-5.1)    | 1.5 (0.8-2.6)            | 14.0 (12.2-16.1) | 2.9 (2.1-4.1)    | 3.1 (2.3-4.3)           | 3.5 (3.0-4.0)    |
| March 21-27, 2021                 | 3.7 (3.4-4.1)    | 1.0 (0.5-1.9)            | 13.2 (11.3-15.3) | 2.0 (1.3-3.0)    | 1.6 (1.0-2.4)           | 2.9 (2.5-3.4)    |
| March 28-April 3, 2021            | 4.5 (4.1-5.0)    | 0.8 (0.4-1.8)            | 14.9 (12.9-17.2) | 1.4 (0.8-2.4)    | 4.4 (3.3-5.9)           | 3.3 (2.8-3.8)    |



| <b>Week</b>          | <b>Overall</b>   | <b>Interlake-Eastern</b> | <b>Northern</b>  | <b>Southern</b>  | <b>Prairie Mountain</b> | <b>Winnipeg</b>  |
|----------------------|------------------|--------------------------|------------------|------------------|-------------------------|------------------|
| April 4-10, 2021     | 5.3 (4.9-5.8)    | 1.6 (1.0-2.7)            | 11.8 (10.2-13.7) | 3.0 (2.3-4.1)    | 3.8 (2.9-5.0)           | 5.2 (4.7-5.8)    |
| April 11-17, 2021    | 5.4 (5.0-5.8)    | 5.2 (4.0-6.6)            | 8.7 (7.4-10.2)   | 3.6 (2.8-4.8)    | 4.7 (3.8-5.9)           | 5.2 (4.8-5.7)    |
| April 18-24, 2021    | 7.0 (6.6-7.4)    | 4.9 (4.0-6.1)            | 6.2 (5.2-7.5)    | 6.2 (5.2-7.5)    | 7.0 (5.9-8.3)           | 7.6 (7.1-8.1)    |
| April 25-May 1, 2021 | 7.4 (7.0-7.7)    | 5.6 (4.5-6.8)            | 4.5 (3.6-5.7)    | 5.7 (4.7-6.8)    | 8.0 (6.9-9.2)           | 8.1 (7.6-8.6)    |
| May 2-8, 2021        | 10.8 (10.4-11.3) | 7.0 (5.8-8.3)            | 6.7 (5.5-8.3)    | 8.4 (7.3-9.7)    | 8.3 (7.1-9.6)           | 12.6 (12.0-13.2) |
| May 9-15, 2021       | 12.1 (11.7-12.6) | 10.1 (8.8-11.5)          | 9.8 (8.1-11.8)   | 11.5 (10.3-12.8) | 7.6 (6.5-8.8)           | 13.6 (13.0-14.2) |
| May 16-22, 2021      | 13.2 (12.7-13.7) | 8.0 (6.9-9.4)            | 10.8 (9.1-12.7)  | 12.2 (10.9-13.6) | 10.1 (8.7-11.6)         | 15.1 (14.4-15.8) |
| May 23-29, 2021      | 11.6 (11.0-12.1) | 8.5 (7.1-10.1)           | 8.1 (6.7-10.0)   | 11.0 (9.6-12.5)  | 9.2 (7.9-10.8)          | 13.1 (12.4-13.9) |

**Supplementary Table 24 Adjusted<sup>a</sup> associations between certain socio-economic and clinical characteristics and COVID-19 testing and incidence during the second<sup>b</sup> and third<sup>c</sup> waves**

|                                               | Testing (rate ratio) | Incidence (hazard ratio) |
|-----------------------------------------------|----------------------|--------------------------|
| <b>Age</b>                                    |                      |                          |
| <10                                           | 0.92 (0.91-0.93)     | 0.85 (0.82-0.88)         |
| 10-17                                         | 0.89 (0.88-0.90)     | 1.14 (1.10-1.18)         |
| 18-29                                         | 1.13 (1.12-1.14)     | 1.26 (1.23-1.30)         |
| 30-49                                         | Ref.                 | Ref.                     |
| 50-64                                         | 0.65 (0.64-0.66)     | 0.75 (0.72-0.77)         |
| ≥65                                           | 0.51 (0.51-0.52)     | 0.50 (0.48-0.52)         |
| Female                                        | 1.09 (1.08-1.09)     | 0.96 (0.94-0.98)         |
| <b>Income quintile</b>                        |                      |                          |
| Q1 (lowest)                                   | Ref.                 | Ref.                     |
| Q2                                            | 0.87 (0.86-0.87)     | 0.64 (0.63-0.66)         |
| Q3                                            | 0.86 (0.85-0.86)     | 0.59 (0.57-0.60)         |
| Q4                                            | 0.84 (0.83-0.85)     | 0.57 (0.56-0.59)         |
| Q5 (highest)                                  | 0.81 (0.81-0.82)     | 0.44 (0.43-0.45)         |
| Unknown                                       | 0.91 (0.89-0.92)     | 0.63 (0.60-0.67)         |
| <b>Regional health authority of residence</b> |                      |                          |
| Interlake-Eastern                             | 0.96 (0.95-0.97)     | 0.75 (0.73-0.78)         |
| Northern                                      | 1.82 (1.80-1.84)     | 2.55 (2.48-2.62)         |
| Southern                                      | 0.79 (0.78-0.79)     | 0.89 (0.86-0.91)         |
| Prairie Mountain                              | 0.75 (0.74-0.76)     | 0.47 (0.45-0.49)         |
| Winnipeg                                      | Ref.                 | Ref.                     |
| Public Trustee / In CFS care                  | 1.27 (1.22-1.32)     | 1.62 (1.46-1.80)         |
| In long-term care-second wave                 | 4.22 (4.10-4.35)     | 5.37 (4.98-5.79)         |
| In long-term care-third wave                  | 1.66 (1.57-1.76)     | 0.50 (0.31-0.80)         |
| Any chronic disease                           | 1.20 (1.19-1.21)     | 1.26 (1.22-1.29)         |
| Immunosuppressed                              | 1.15 (1.13-1.16)     | 0.92 (0.88-0.97)         |
| Use of ARBs/ACEIs <sup>d</sup>                | 0.99 (0.98-1.00)     | 1.10 (1.07-1.14)         |
| Use of proton-pump inhibitors                 | 1.46 (1.45-1.48)     | 1.27 (1.24-1.31)         |
| <b>No. of physician visits in 2019</b>        |                      |                          |
| 0                                             | Ref.                 | Ref.                     |
| 1-3                                           | 1.44 (1.43-1.46)     | 1.15 (1.12-1.18)         |
| 4-8                                           | 1.69 (1.67-1.71)     | 1.19 (1.15-1.22)         |
| ≥9                                            | 2.07 (2.05-2.09)     | 1.26 (1.22-1.30)         |
| <b>No. of hospitalizations in 2019</b>        |                      |                          |
| 0                                             | Ref.                 | Ref.                     |
| 1                                             | 1.12 (1.10-1.13)     | 1.09 (1.05-1.13)         |
| ≥2                                            | 1.50 (1.47-1.53)     | 1.28 (1.20-1.37)         |

<sup>a</sup> Adjusted for age, gender, income quintile, regional health authority of residence, long-term care status, chronic disease, ARB/ACEI use, proton-pump inhibitor use, immunosuppression, and number of physician visits and hospitalizations in 2019. <sup>b</sup> The second wave is from October 1, 2020 to Feb 28, 2021. <sup>c</sup> The third wave is from March 1, 2021 to June 1, 2021. <sup>d</sup> ARBs/ACEIs: Angiotensin receptor blockers and angiotensin converting enzyme inhibitors.

**Supplementary Table 25 Adjusted<sup>a</sup> associations between certain socio-economic and clinical characteristics and COVID-19 testing and incidence by pandemic stage**

|                                               | Testing (rate ratio)     |                         | Incidence (hazard ratio) |                         |
|-----------------------------------------------|--------------------------|-------------------------|--------------------------|-------------------------|
|                                               | Second wave <sup>b</sup> | Third wave <sup>c</sup> | Second wave <sup>b</sup> | Third wave <sup>c</sup> |
| <b>Age</b>                                    |                          |                         |                          |                         |
| <10                                           | 0.74 (0.73-0.75)         | 1.14 (1.13-1.16)        | 0.64 (0.61-0.67)         | 1.11 (1.06-1.17)        |
| 10-17                                         | 0.79 (0.78-0.81)         | 1.00 (0.98-1.02)        | 0.98 (0.93-1.03)         | 1.34 (1.27-1.42)        |
| 18-29                                         | 1.13 (1.12-1.14)         | 1.12 (1.10-1.13)        | 1.17 (1.13-1.22)         | 1.35 (1.29-1.41)        |
| 30-49                                         | Ref.                     | Ref.                    | Ref.                     | Ref.                    |
| 50-64                                         | 0.68 (0.67-0.69)         | 0.63 (0.62-0.64)        | 0.88 (0.84-0.91)         | 0.63 (0.59-0.66)        |
| ≥65                                           | 0.54 (0.53-0.54)         | 0.50 (0.49-0.51)        | 0.71 (0.68-0.75)         | 0.30 (0.27-0.32)        |
| Female                                        | 1.09 (1.08-1.10)         | 1.09 (1.08-1.10)        | 0.95 (0.93-0.97)         | 0.96 (0.93-0.99)        |
| <b>Income quintile</b>                        |                          |                         |                          |                         |
| Q1 (lowest)                                   | Ref.                     | Ref.                    | Ref.                     | Ref.                    |
| Q2                                            | 0.85 (0.84-0.86)         | 0.89 (0.88-0.90)        | 0.63 (0.61-0.65)         | 0.68 (0.65-0.71)        |
| Q3                                            | 0.85 (0.84-0.86)         | 0.86 (0.84-0.87)        | 0.57 (0.54-0.59)         | 0.63 (0.60-0.65)        |
| Q4                                            | 0.84 (0.83-0.85)         | 0.84 (0.82-0.85)        | 0.59 (0.57-0.61)         | 0.56 (0.53-0.58)        |
| Q5 (highest)                                  | 0.81 (0.80-0.82)         | 0.81 (0.80-0.82)        | 0.45 (0.43-0.47)         | 0.42 (0.40-0.45)        |
| Unknown                                       | 0.90 (0.88-0.92)         | 0.91 (0.89-0.94)        | 0.62 (0.58-0.66)         | 0.65 (0.60-0.71)        |
| <b>Regional health authority of residence</b> |                          |                         |                          |                         |
| Interlake-Eastern                             | 1.01 (1.00-1.02)         | 0.89 (0.88-0.90)        | 0.89 (0.85-0.93)         | 0.58 (0.54-0.62)        |
| Northern                                      | 1.93 (1.91-1.96)         | 1.71 (1.68-1.74)        | 3.20 (3.09-3.32)         | 1.75 (1.67-1.84)        |
| Southern                                      | 0.84 (0.83-0.85)         | 0.72 (0.71-0.73)        | 1.12 (1.08-1.16)         | 0.60 (0.57-0.63)        |
| Prairie Mountain                              | 0.74 (0.73-0.75)         | 0.77 (0.76-0.78)        | 0.43 (0.40-0.45)         | 0.54 (0.51-0.57)        |
| Winnipeg                                      | Ref.                     | Ref.                    | Ref.                     | Ref.                    |
| Public Trustee / In CFS care                  | 1.35 (1.29-1.42)         | 1.14 (1.08-1.22)        | 1.86 (1.65-2.10)         | 1.28 (1.03-1.58)        |
| In long-term care                             | 4.22 (4.10-4.35)         | 1.66 (1.57-1.76)        | 5.37 (4.98-5.79)         | 0.50 (0.31-0.80)        |
| Any chronic disease                           | 1.22 (1.21-1.24)         | 1.21 (1.19-1.22)        | 1.31 (1.26-1.35)         | 1.18 (1.12-1.24)        |
| Immunosuppressed                              | 1.15 (1.14-1.17)         | 1.15 (1.13-1.17)        | 0.90 (0.85-0.95)         | 0.98 (0.91-1.06)        |
| Use of ARBs/ACEIs <sup>d</sup>                | 0.96 (0.95-0.97)         | 0.95 (0.93-0.96)        | 1.13 (1.08-1.17)         | 1.01 (0.95-1.07)        |
| Use of proton-pump inhibitors                 | 1.36 (1.34-1.37)         | 1.37 (1.35-1.38)        | 1.18 (1.14-1.23)         | 1.21 (1.14-1.28)        |
| <b>No. of physician visits in 2019</b>        |                          |                         |                          |                         |
| 0                                             | Ref.                     | Ref.                    | Ref.                     | Ref.                    |
| 1-3                                           | 1.48 (1.46-1.50)         | 1.41 (1.39-1.43)        | 1.22 (1.17-1.26)         | 1.08 (1.03-1.12)        |
| 4-8                                           | 1.76 (1.73-1.78)         | 1.65 (1.62-1.67)        | 1.26 (1.21-1.31)         | 1.12 (1.07-1.17)        |
| ≥9                                            | 2.19 (2.16-2.22)         | 2.03 (2.00-2.06)        | 1.37 (1.31-1.43)         | 1.17 (1.11-1.24)        |
| <b>No. of hospitalizations in 2019</b>        |                          |                         |                          |                         |
| 0                                             | Ref.                     | Ref.                    | Ref.                     | Ref.                    |
| 1                                             | 1.11 (1.09-1.13)         | 1.12 (1.10-1.14)        | 1.08 (1.03-1.14)         | 1.07 (1.00-1.15)        |
| ≥2                                            | 1.51 (1.48-1.55)         | 1.47 (1.43-1.52)        | 1.35 (1.25-1.45)         | 1.02 (0.88-1.17)        |

<sup>a</sup> Adjusted for age, gender, income quintile, regional health authority of residence, long-term care status, chronic disease, ARB/ACEI use, proton-pump inhibitor use, immunosuppression, and number of physician visits and hospitalizations in 2019. <sup>b</sup> The second wave is from October 1, 2020 to Feb 28, 2021. <sup>c</sup> The third wave is from March 1, 2021 to June 1, 2021. <sup>d</sup> ARBs/ACEIs: Angiotensin receptor blockers and angiotensin converting enzyme inhibitors.

**Supplementary Table 26 Crude rate ratios (95% confidence interval) of the association between SARS-CoV-2 testing and certain socio-economic and clinical characteristics by pandemic stage**

|                                        | Second wave <sup>a</sup> | Third wave <sup>b</sup> |
|----------------------------------------|--------------------------|-------------------------|
| Age                                    |                          |                         |
| <10                                    | 0.74 (0.73-0.75)         | 1.14 (1.13-1.16)        |
| 10-17                                  | 0.79 (0.78-0.81)         | 1.00 (0.98-1.02)        |
| 18-29                                  | 1.13 (1.12-1.14)         | 1.12 (1.10-1.13)        |
| 30-49                                  | Ref.                     | Ref.                    |
| 50-64                                  | 0.68 (0.67-0.69)         | 0.63 (0.62-0.64)        |
| ≥65                                    | 0.54 (0.53-0.54)         | 0.50 (0.49-0.51)        |
| Female                                 | 1.09 (1.08-1.10)         | 1.09 (1.08-1.10)        |
| Income quintile                        |                          |                         |
| Q1 (lowest)                            | Ref.                     | Ref.                    |
| Q2                                     | 0.85 (0.84-0.86)         | 0.89 (0.88-0.90)        |
| Q3                                     | 0.85 (0.84-0.86)         | 0.86 (0.84-0.87)        |
| Q4                                     | 0.84 (0.83-0.85)         | 0.84 (0.82-0.85)        |
| Q5 (highest)                           | 0.81 (0.80-0.82)         | 0.81 (0.80-0.82)        |
| Unknown                                | 0.90 (0.88-0.92)         | 0.91 (0.89-0.94)        |
| Regional health authority of residence |                          |                         |
| Interlake-Eastern                      | 1.01 (1.00-1.02)         | 0.89 (0.88-0.90)        |
| Northern                               | 1.93 (1.91-1.96)         | 1.71 (1.68-1.74)        |
| Southern                               | 0.84 (0.83-0.85)         | 0.72 (0.71-0.73)        |
| Prairie Mountain                       | 0.74 (0.73-0.75)         | 0.77 (0.76-0.78)        |
| Winnipeg                               | Ref.                     | Ref.                    |
| Public Trustee / In CFS care           | 1.35 (1.29-1.42)         | 1.14 (1.08-1.22)        |
| In long-term care                      | 4.22 (4.10-4.35)         | 1.66 (1.57-1.76)        |
| Any chronic disease                    | 1.22 (1.21-1.24)         | 1.21 (1.19-1.22)        |
| Immunosuppressed                       | 1.15 (1.14-1.17)         | 1.15 (1.13-1.17)        |
| Use of ARBs/ACEIs <sup>c</sup>         | 0.96 (0.95-0.97)         | 0.95 (0.93-0.96)        |
| Use of proton-pump inhibitors          | 1.36 (1.34-1.37)         | 1.37 (1.35-1.38)        |
| No. of physician visits in 2019        |                          |                         |
| 0                                      | Ref.                     | Ref.                    |
| 1-3                                    | 1.48 (1.46-1.50)         | 1.41 (1.39-1.43)        |
| 4-8                                    | 1.76 (1.73-1.78)         | 1.65 (1.62-1.67)        |
| ≥9                                     | 2.19 (2.16-2.22)         | 2.03 (2.00-2.06)        |
| No. of hospitalizations in 2019        |                          |                         |
| 0                                      | Ref.                     | Ref.                    |
| 1                                      | 1.11 (1.09-1.13)         | 1.12 (1.10-1.14)        |
| ≥2                                     | 1.51 (1.48-1.55)         | 1.47 (1.43-1.52)        |

<sup>a</sup> The second wave is from October 1, 2020 to Feb 28, 2021. <sup>b</sup> The third wave is from March 1, 2021 to June 1, 2021. <sup>c</sup> ARBs/ACEIs: Angiotensin receptor blockers and angiotensin converting enzyme inhibitors.

**Supplementary Table 27 Crude hazard ratios (95% confidence interval) of the association between COVID-19 incidence and certain socio-economic and clinical characteristics by pandemic stage**

|                                               | Second wave <sup>a</sup> | Third wave <sup>b</sup> |
|-----------------------------------------------|--------------------------|-------------------------|
| <b>Age</b>                                    |                          |                         |
| <10                                           | 0.64 (0.61-0.67)         | 1.11 (1.06-1.17)        |
| 10-17                                         | 0.98 (0.93-1.03)         | 1.34 (1.27-1.42)        |
| 18-29                                         | 1.17 (1.13-1.22)         | 1.35 (1.29-1.41)        |
| 30-49                                         | Ref.                     | Ref.                    |
| 50-64                                         | 0.88 (0.84-0.91)         | 0.63 (0.59-0.66)        |
| ≥65                                           | 0.71 (0.68-0.75)         | 0.30 (0.27-0.32)        |
| Female                                        | 0.95 (0.93-0.97)         | 0.96 (0.93-0.99)        |
| <b>Income quintile</b>                        |                          |                         |
| Q1 (lowest)                                   | Ref.                     | Ref.                    |
| Q2                                            | 0.63 (0.61-0.65)         | 0.68 (0.65-0.71)        |
| Q3                                            | 0.57 (0.54-0.59)         | 0.63 (0.60-0.65)        |
| Q4                                            | 0.59 (0.57-0.61)         | 0.56 (0.53-0.58)        |
| Q5 (highest)                                  | 0.45 (0.43-0.47)         | 0.42 (0.40-0.45)        |
| Unknown                                       | 0.62 (0.58-0.66)         | 0.65 (0.60-0.71)        |
| <b>Regional health authority of residence</b> |                          |                         |
| Interlake-Eastern                             | 0.89 (0.85-0.93)         | 0.58 (0.54-0.62)        |
| Northern                                      | 3.20 (3.09-3.32)         | 1.75 (1.67-1.84)        |
| Southern                                      | 1.12 (1.08-1.16)         | 0.60 (0.57-0.63)        |
| Prairie Mountain                              | 0.43 (0.40-0.45)         | 0.54 (0.51-0.57)        |
| Winnipeg                                      | Ref.                     | Ref.                    |
| Public Trustee / In CFS care                  | 1.86 (1.65-2.10)         | 1.28 (1.03-1.58)        |
| In long-term care                             | 5.37 (4.98-5.79)         | 0.50 (0.31-0.80)        |
| Any chronic disease                           | 1.31 (1.26-1.35)         | 1.18 (1.12-1.24)        |
| Immunosuppressed                              | 0.90 (0.85-0.95)         | 0.98 (0.91-1.06)        |
| Use of ARBs/ACEIs <sup>c</sup>                | 1.13 (1.08-1.17)         | 1.01 (0.95-1.07)        |
| Use of proton-pump inhibitors                 | 1.18 (1.14-1.23)         | 1.21 (1.14-1.28)        |
| <b>No. of physician visits in 2019</b>        |                          |                         |
| 0                                             | Ref.                     | Ref.                    |
| 1-3                                           | 1.22 (1.17-1.26)         | 1.08 (1.03-1.12)        |
| 4-8                                           | 1.26 (1.21-1.31)         | 1.12 (1.07-1.17)        |
| ≥9                                            | 1.37 (1.31-1.43)         | 1.17 (1.11-1.24)        |
| <b>No. of hospitalizations in 2019</b>        |                          |                         |
| 0                                             | Ref.                     | Ref.                    |
| 1                                             | 1.08 (1.03-1.14)         | 1.07 (1.00-1.15)        |
| ≥2                                            | 1.35 (1.25-1.45)         | 1.02 (0.88-1.17)        |

<sup>a</sup> The second wave is from October 1, 2020 to Feb 28, 2021. <sup>b</sup> The third wave is from March 1, 2021 to June 1, 2021. <sup>c</sup> ARBs/ACEIs: Angiotensin receptor blockers and angiotensin converting enzyme inhibitors.

**Supplementary Table 28 Crude associations between certain socio-economic and clinical characteristics and COVID-19 testing and incidence during the second<sup>a</sup> and third<sup>b</sup> waves**

|                                               | Testing (rate ratio) | Incidence (hazard ratio) |
|-----------------------------------------------|----------------------|--------------------------|
| <b>Age</b>                                    |                      |                          |
| <10                                           | 0.83 (0.82-0.84)     | 0.84 (0.81-0.87)         |
| 10-17                                         | 0.77 (0.76-0.78)     | 1.10 (1.06-1.14)         |
| 18-29                                         | 1.02 (1.01-1.03)     | 1.24 (1.20-1.27)         |
| 30-49                                         | Ref.                 | Ref.                     |
| 50-64                                         | 0.76 (0.75-0.77)     | 0.82 (0.80-0.85)         |
| ≥65                                           | 0.76 (0.75-0.77)     | 0.70 (0.68-0.72)         |
| Female                                        | 1.18 (1.18-1.19)     | 0.99 (0.97-1.00)         |
| <b>Income quintile</b>                        |                      |                          |
| Q1 (lowest)                                   | Ref.                 | Ref.                     |
| Q2                                            | 0.86 (0.86-0.87)     | 0.64 (0.62-0.66)         |
| Q3                                            | 0.79 (0.78-0.80)     | 0.50 (0.49-0.52)         |
| Q4                                            | 0.79 (0.78-0.80)     | 0.53 (0.52-0.55)         |
| Q5 (highest)                                  | 0.79 (0.78-0.79)     | 0.43 (0.41-0.44)         |
| Unknown                                       | 1.00 (0.99-1.02)     | 0.73 (0.69-0.76)         |
| <b>Regional health authority of residence</b> |                      |                          |
| Interlake-Eastern                             | 0.93 (0.92-0.94)     | 0.73 (0.70-0.76)         |
| Northern                                      | 1.74 (1.72-1.75)     | 2.76 (2.68-2.83)         |
| Southern                                      | 0.76 (0.75-0.77)     | 0.85 (0.83-0.88)         |
| Prairie Mountain                              | 0.77 (0.77-0.78)     | 0.51 (0.49-0.53)         |
| Winnipeg                                      | Ref.                 | Ref.                     |
| Public Trustee / In CFS care                  | 1.67 (1.62-1.73)     | 2.29 (2.08-2.51)         |
| In long-term care - second wave               | 4.62 (4.51-4.73)     | 5.30 (4.98-5.64)         |
| In long-term care - third wave                | 1.58 (1.50-1.66)     | 0.22 (0.14-0.35)         |
| Any chronic disease                           | 1.34 (1.33-1.35)     | 1.28 (1.25-1.31)         |
| Immunosuppressed                              | 1.34 (1.32-1.35)     | 0.92 (0.88-0.96)         |
| Use of ARBs/ACEIs <sup>c</sup>                | 1.05 (1.05-1.06)     | 1.06 (1.03-1.09)         |
| Use of proton-pump inhibitors                 | 1.61 (1.59-1.62)     | 1.28 (1.24-1.31)         |
| <b>No. of physician visits in 2019</b>        |                      |                          |
| 0                                             | Ref.                 | Ref.                     |
| 1-3                                           | 1.40 (1.39-1.42)     | 1.09 (1.06-1.12)         |
| 4-8                                           | 1.56 (1.55-1.58)     | 1.02 (0.99-1.05)         |
| ≥9                                            | 2.01 (1.99-2.02)     | 1.13 (1.10-1.16)         |
| <b>No. of hospitalizations in 2019</b>        |                      |                          |
| 0                                             | Ref.                 | Ref.                     |
| 1                                             | 1.52 (1.50-1.54)     | 1.30 (1.25-1.35)         |
| ≥2                                            | 2.38 (2.34-2.42)     | 1.87 (1.75-1.99)         |

<sup>a</sup> The second wave is from October 1, 2020 to Feb 28, 2021. <sup>b</sup> The third wave is from March 1, 2021 to June 1, 2021. <sup>c</sup> ARBs/ACEIs: Angiotensin receptor blockers and angiotensin converting enzyme inhibitors.

**Supplementary Table 29 Prevalence ratios (95% confidence interval) of the association between severe COVID-19 outcomes and certain socio-economic and clinical characteristics during the second wave<sup>a</sup>**

|                                               | Unadjusted       |                   |                     | Adjusted <sup>b</sup> |                  |                     |
|-----------------------------------------------|------------------|-------------------|---------------------|-----------------------|------------------|---------------------|
|                                               | Hospitalization  | ICU admission     | Death               | Hospitalization       | ICU admission    | Death               |
| <b>Age</b>                                    |                  |                   |                     |                       |                  |                     |
| <10                                           | 0.08 (0.04-0.16) | No cases          | 0.08 (0.01-0.58)    | 0.10 (0.05-0.20)      | No cases         | 0.10 (0.01-0.72)    |
| 10-17                                         | 0.20 (0.14-0.31) | 0.04 (0.01-0.30)  | No cases            | 0.29 (0.19-0.43)      | 0.07 (0.01-0.48) | No cases            |
| 18-29                                         | 0.68 (0.56-0.82) | 0.30 (0.17-0.53)  | 0.07 (0.02-0.30)    | 0.81 (0.67-0.98)      | 0.41 (0.23-0.72) | 0.08 (0.02-0.34)    |
| 30-49                                         | Ref.             | Ref.              | Ref.                | Ref.                  | Ref.             | Ref.                |
| 50-64                                         | 2.15 (1.86-2.48) | 3.27 (2.45-4.37)  | 3.55 (2.43-5.19)    | 1.65 (1.43-1.92)      | 2.17 (1.59-2.95) | 2.97 (2.02-4.36)    |
| ≥65                                           | 7.07 (6.26-7.99) | 4.66 (3.52-6.16)  | 38.60 (27.97-53.27) | 5.12 (4.42-5.92)      | 2.74 (1.94-3.86) | 19.68 (13.66-28.34) |
| Female                                        | 1.01 (0.93-1.10) | 0.76 (0.62-0.93)  | 1.06 (0.93-1.21)    | 0.89 (0.81-0.97)      | 0.71 (0.58-0.87) | 0.75 (0.66-0.86)    |
| <b>Income quintile</b>                        |                  |                   |                     |                       |                  |                     |
| Q1 (lowest)                                   | Ref.             | Ref.              | Ref.                | Ref.                  | Ref.             | Ref.                |
| Q2                                            | 0.81 (0.71-0.91) | 0.68 (0.52-0.90)  | 0.89 (0.71-1.13)    | 0.83 (0.73-0.94)      | 0.77 (0.58-1.02) | 0.79 (0.63-1.00)    |
| Q3                                            | 0.77 (0.67-0.88) | 0.69 (0.50-0.94)  | 1.10 (0.87-1.40)    | 0.71 (0.62-0.82)      | 0.72 (0.52-0.98) | 0.80 (0.63-1.02)    |
| Q4                                            | 0.83 (0.73-0.94) | 0.57 (0.42-0.78)  | 1.48 (1.20-1.83)    | 0.73 (0.64-0.83)      | 0.58 (0.42-0.80) | 0.95 (0.77-1.18)    |
| Q5 (highest)                                  | 0.64 (0.55-0.75) | 0.49 (0.34-0.71)  | 0.88 (0.67-1.15)    | 0.68 (0.58-0.79)      | 0.56 (0.39-0.81) | 0.78 (0.59-1.02)    |
| Unknown                                       | 0.88 (0.73-1.06) | 0.65 (0.41-1.03)  | 6.88 (5.69-8.32)    | 0.45 (0.35-0.57)      | 0.48 (0.26-0.90) | 1.04 (0.81-1.34)    |
| <b>Regional health authority of residence</b> |                  |                   |                     |                       |                  |                     |
| Interlake-Eastern                             | 0.81 (0.68-0.96) | 1.35 (0.97-1.86)  | 0.57 (0.42-0.77)    | 0.83 (0.69-0.99)      | 1.25 (0.89-1.74) | 0.84 (0.62-1.15)    |
| Northern                                      | 0.80 (0.70-0.91) | 0.81 (0.61-1.08)  | 0.25 (0.18-0.34)    | 1.04 (0.90-1.18)      | 0.96 (0.71-1.30) | 0.70 (0.51-0.96)    |
| Southern                                      | 1.10 (0.98-1.24) | 0.77 (0.56-1.05)  | 0.81 (0.66-0.98)    | 0.98 (0.87-1.11)      | 0.73 (0.54-1.01) | 0.86 (0.71-1.06)    |
| Prairie Mountain                              | 0.80 (0.64-0.99) | 0.56 (0.31-0.99)  | 0.79 (0.58-1.08)    | 0.76 (0.61-0.94)      | 0.51 (0.28-0.92) | 0.71 (0.52-0.96)    |
| Winnipeg                                      | Ref.             | Ref.              | Ref.                | Ref.                  | Ref.             | Ref.                |
| Public Trustee / In CFS care                  | 1.72 (1.28-2.32) | 1.56 (0.77-3.16)  | 3.57 (2.63-4.85)    | 1.56 (1.06-2.31)      | 1.60 (0.64-4.01) | 0.94 (0.67-1.32)    |
| In long-term care                             | 1.09 (0.88-1.35) | 0.64 (0.34-1.19)  | 15.82 (13.78-18.17) | 0.23 (0.18-0.29)      | 0.20 (0.10-0.40) | 1.88 (1.55-2.28)    |
| Any chronic disease                           | 6.13 (5.59-6.71) | 8.73 (6.94-10.98) | 10.93 (9.29-12.87)  | 2.04 (1.82-2.28)      | 2.99 (2.27-3.94) | 1.91 (1.58-2.31)    |
| Immunosuppressed                              | 3.37 (2.98-3.81) | 3.45 (2.62-4.54)  | 3.61 (3.00-4.34)    | 1.23 (1.08-1.40)      | 1.32 (0.99-1.76) | 1.27 (1.05-1.53)    |
| Use of ARBs/ACEIs <sup>c</sup>                | 3.55 (3.25-3.88) | 4.79 (3.93-5.84)  | 2.83 (2.45-3.26)    | 1.00 (0.90-1.10)      | 1.27 (1.01-1.59) | 0.74 (0.63-0.85)    |
| Use of proton-pump inhibitors                 | 3.85 (3.52-4.22) | 3.86 (3.14-4.75)  | 4.85 (4.24-5.56)    | 1.27 (1.15-1.41)      | 1.26 (1.01-1.59) | 1.29 (1.11-1.49)    |
| <b>No. of physician visits in 2019</b>        |                  |                   |                     |                       |                  |                     |
| 0                                             | Ref.             | Ref.              | Ref.                | Ref.                  | Ref.             | Ref.                |
| 1-3                                           | 1.26 (0.99-1.59) | 1.46 (0.83-2.56)  | 1.42 (0.84-2.39)    | 1.13 (0.89-1.44)      | 1.07 (0.60-1.90) | 0.91 (0.54-1.54)    |
| 4-8                                           | 2.55 (2.05-3.17) | 2.49 (1.46-4.24)  | 3.52 (2.19-5.66)    | 1.30 (1.03-1.64)      | 0.92 (0.52-1.63) | 0.88 (0.54-1.43)    |
| ≥9                                            | 6.80 (5.56-8.31) | 7.54 (4.62-12.31) | 16.81 (10.78-26.22) | 1.50 (1.18-1.90)      | 1.27 (0.73-2.22) | 1.09 (0.68-1.76)    |
| <b>No. of hospitalizations in 2019</b>        |                  |                   |                     |                       |                  |                     |
| 0                                             | Ref.             | Ref.              | Ref.                | Ref.                  | Ref.             | Ref.                |
| 1                                             | 2.96 (2.63-3.33) | 2.62 (1.98-3.47)  | 3.29 (2.75-3.93)    | 1.74 (1.53-1.97)      | 1.52 (1.12-2.04) | 1.26 (1.05-1.52)    |
| ≥2                                            | 6.28 (5.50-7.17) | 4.70 (3.39-6.52)  | 6.44 (5.27-7.89)    | 2.55 (2.20-2.96)      | 1.78 (1.25-2.55) | 1.35 (1.09-1.69)    |

<sup>a</sup> The second wave is from October 1, 2020 to Feb 28, 2021. <sup>b</sup> Adjusted for age, gender, income quintile, regional health authority of residence, long-term care status, chronic disease, ARB/ACEI use, proton-pump inhibitor use, immunosuppression, and number of physician visits and hospitalizations in 2019. <sup>c</sup> ARBs/ACEIs: Angiotensin receptor blockers and angiotensin converting enzyme inhibitors.

**Supplementary Table 30 Prevalence ratios (95% confidence interval) of the association between severe COVID-19 outcomes and certain socio-economic and clinical characteristics during the third wave<sup>a</sup>**

|                                               | Unadjusted        |                   |                     | Adjusted <sup>b</sup> |                  |                   |
|-----------------------------------------------|-------------------|-------------------|---------------------|-----------------------|------------------|-------------------|
|                                               | Hospitalization   | ICU admission     | Death               | Hospitalization       | ICU admission    | Death             |
| <b>Age</b>                                    |                   |                   |                     |                       |                  |                   |
| <10                                           | 0.07 (0.04-0.14)  | No cases          | No cases            | 0.09 (0.05-0.16)      | No cases         | No cases          |
| 10-17                                         | 0.14 (0.09-0.23)  | 0.07 (0.02-0.22)  | No cases            | 0.18 (0.11-0.29)      | 0.10 (0.03-0.32) | No cases          |
| 18-29                                         | 0.63 (0.52-0.77)  | 0.30 (0.19-0.46)  | 0.54 (0.21-1.40)    | 0.74 (0.61-0.91)      | 0.38 (0.24-0.59) | 0.68 (0.26-1.79)  |
| 30-49                                         | Ref.              | Ref.              | Ref.                | Ref.                  | Ref.             | Ref.              |
| 50-64                                         | 2.25 (1.91-2.65)  | 2.27 (1.73-2.98)  | 5.43 (2.92-10.09)   | 1.62 (1.37-1.92)      | 1.39 (1.04-1.86) | 3.25 (1.71-6.17)  |
| ≥65                                           | 6.14 (5.23-7.20)  | 3.08 (2.24-4.23)  | 24.67 (13.87-43.89) | 3.10 (2.56-3.75)      | 1.30 (0.90-1.88) | 9.49 (4.94-18.24) |
| Female                                        | 1.05 (0.93-1.19)  | 0.84 (0.67-1.05)  | 0.61 (0.42-0.87)    | 0.93 (0.82-1.05)      | 0.71 (0.57-0.90) | 0.50 (0.35-0.74)  |
| <b>Income quintile</b>                        |                   |                   |                     |                       |                  |                   |
| Q1 (lowest)                                   | Ref.              | Ref.              | Ref.                | Ref.                  | Ref.             | Ref.              |
| Q2                                            | 0.62 (0.52-0.73)  | 0.68 (0.49-0.93)  | 0.47 (0.27-0.79)    | 0.67 (0.56-0.79)      | 0.73 (0.54-1.00) | 0.60 (0.35-1.03)  |
| Q3                                            | 0.69 (0.58-0.83)  | 0.73 (0.53-1.02)  | 0.54 (0.32-0.94)    | 0.72 (0.60-0.86)      | 0.73 (0.52-1.03) | 0.67 (0.39-1.14)  |
| Q4                                            | 0.74 (0.62-0.89)  | 0.60 (0.42-0.87)  | 0.48 (0.27-0.87)    | 0.72 (0.60-0.86)      | 0.60 (0.41-0.86) | 0.50 (0.27-0.93)  |
| Q5 (highest)                                  | 0.46 (0.36-0.58)  | 0.34 (0.20-0.56)  | 0.30 (0.14-0.66)    | 0.47 (0.37-0.60)      | 0.35 (0.21-0.58) | 0.37 (0.16-0.81)  |
| Unknown                                       | 0.60 (0.43-0.86)  | 0.64 (0.33-1.21)  | 1.39 (0.71-2.73)    | 0.41 (0.25-0.68)      | 0.59 (0.26-1.34) | 1.00 (0.33-3.04)  |
| <b>Regional health authority of residence</b> |                   |                   |                     |                       |                  |                   |
| Interlake-Eastern                             | 1.67 (1.33-2.09)  | 1.73 (1.16-2.60)  | 0.79 (0.29-2.19)    | 1.55 (1.24-1.94)      | 1.61 (1.08-2.42) | 0.62 (0.22-1.74)  |
| Northern                                      | 1.15 (0.95-1.39)  | 1.07 (0.74-1.53)  | 1.66 (0.97-2.82)    | 1.26 (1.03-1.55)      | 1.17 (0.80-1.72) | 1.87 (1.04-3.34)  |
| Southern                                      | 1.64 (1.36-1.97)  | 0.99 (0.66-1.50)  | 2.50 (1.51-4.14)    | 1.43 (1.19-1.72)      | 0.95 (0.63-1.44) | 1.82 (1.08-3.08)  |
| Prairie Mountain                              | 1.64 (1.34-2.00)  | 1.43 (0.97-2.11)  | 2.67 (1.57-4.55)    | 1.24 (1.01-1.54)      | 1.03 (0.68-1.54) | 1.77 (1.04-3.01)  |
| Winnipeg                                      | Ref.              | Ref.              | Ref.                | Ref.                  | Ref.             | Ref.              |
| Public Trustee / In CFS care                  | 3.36 (2.08-5.44)  | 2.56 (0.95-6.89)  | 12.11 (5.21-28.10)  | 4.08 (1.98-8.43)      | 2.49 (0.67-9.34) | 4.09 (0.96-17.41) |
| In long-term care                             | 5.97 (2.71-13.16) | No cases          | 34.76 (12.92-93.48) | 1.01 (0.41-2.49)      | No cases         | 2.58 (0.62-10.74) |
| Any chronic disease                           | 6.13 (5.43-6.91)  | 7.15 (5.68-9.02)  | 14.51 (9.70-21.72)  | 2.02 (1.74-2.36)      | 2.24 (1.69-2.97) | 2.56 (1.55-4.23)  |
| Immunosuppressed                              | 4.10 (3.45-4.88)  | 4.44 (3.23-6.10)  | 6.59 (4.27-10.17)   | 1.59 (1.32-1.91)      | 1.66 (1.20-2.31) | 2.01 (1.28-3.16)  |
| Use of ARBs/ACEIs <sup>c</sup>                | 5.04 (4.43-5.73)  | 5.91 (4.66-7.49)  | 9.70 (6.80-13.83)   | 1.24 (1.06-1.44)      | 1.47 (1.11-1.94) | 1.46 (0.98-2.19)  |
| Use of proton-pump inhibitors                 | 4.16 (3.64-4.76)  | 4.47 (3.48-5.74)  | 6.84 (4.75-9.83)    | 1.17 (1.01-1.37)      | 1.23 (0.92-1.64) | 1.28 (0.85-1.94)  |
| <b>No. of physician visits in 2019</b>        |                   |                   |                     |                       |                  |                   |
| 0                                             | Ref.              | Ref.              | Ref.                | Ref.                  | Ref.             | Ref.              |
| 1-3                                           | 1.01 (0.79-1.29)  | 0.97 (0.58-1.62)  | 1.09 (0.42-2.80)    | 0.94 (0.73-1.21)      | 0.88 (0.53-1.46) | 0.82 (0.32-2.09)  |
| 4-8                                           | 1.70 (1.35-2.14)  | 1.84 (1.15-2.94)  | 2.52 (1.08-5.87)    | 1.00 (0.78-1.28)      | 1.02 (0.63-1.65) | 0.94 (0.40-2.21)  |
| ≥9                                            | 4.55 (3.70-5.60)  | 5.59 (3.67-8.50)  | 9.22 (4.26-19.95)   | 1.24 (0.97-1.59)      | 1.54 (0.96-2.47) | 1.07 (0.46-2.49)  |
| <b>No. of hospitalizations in 2019</b>        |                   |                   |                     |                       |                  |                   |
| 0                                             | Ref.              | Ref.              | Ref.                | Ref.                  | Ref.             | Ref.              |
| 1                                             | 2.30 (1.91-2.78)  | 1.55 (1.02-2.35)  | 2.21 (1.24-3.95)    | 1.38 (1.13-1.68)      | 0.86 (0.56-1.33) | 0.93 (0.51-1.71)  |
| ≥2                                            | 6.19 (4.78-8.02)  | 6.33 (3.97-10.08) | 12.22 (6.98-21.41)  | 1.88 (1.41-2.50)      | 2.01 (1.22-3.31) | 2.22 (1.10-4.45)  |

<sup>a</sup> The third wave is from March 1, 2021 to June 1, 2021. <sup>b</sup> Adjusted for age, gender, income quintile, regional health authority of residence, long-term care status, chronic disease, ARB/ACEI use, proton-pump inhibitor use, immunosuppression, and number of physician visits and hospitalizations in 2019. <sup>c</sup> ARBs/ACEIs: Angiotensin receptor blockers and angiotensin converting enzyme inhibitors.
